# Supplementary material for: Synthesis and evaluation of isothiazolo[4,5-b]pyridines as cyclin G-associated kinase (GAK) inhibitors
Source: Royal Society of Chemistry journal article supplement (doi:10.1039/d4ob00908h), 2024-01-01
Supplement: d4ob00908h1.pdf [file d4ob00908h1.pdf]

## Supporting information

### Synthesis and evaluation of isothiazolo[4,5-*b*]pyridines as cyclin G-associated kinase (GAK) inhibitors

Yulia Ivanova,<sup>a</sup> Sander Spittaels,<sup>a</sup> Ling-Jie Gao,<sup>b</sup> Dominique Schols,<sup>c</sup> Luc Van Meervelt,<sup>d</sup>  
Mathy Froeyen,<sup>b</sup> Wim Dehaen,<sup>a</sup> Steven De Jonghe<sup>c\*</sup>

<sup>a</sup> KU Leuven, Department of Chemistry, Sustainable Chemistry for Metals and Molecules,  
Celestijnenlaan 200F, B-3001 Leuven, Belgium.

<sup>b</sup> KU Leuven, Department of Pharmaceutical and Pharmacological Sciences, Rega Institute  
for Medical Research, Laboratory of Medicinal Chemistry, Herestraat 49, box 1030, 3000  
Leuven, Belgium

<sup>c</sup> KU Leuven, Department of Microbiology, Immunology and Transplantation, Rega Institute  
for Medical Research, Laboratory of Virology and Chemotherapy, Herestraat 49, box 1043,  
3000 Leuven, Belgium

<sup>d</sup> KU Leuven, Department of Chemistry, Biomolecular Architecture, Celestijnenlaan 200F, B-  
3001 Leuven, Belgium

\*Corresponding author:

Email: [steven.dejonghe@kuleuven.be](mailto:steven.dejonghe@kuleuven.be) (S. De Jonghe)

## Table of Contents

|                                                                 |    |
|-----------------------------------------------------------------|----|
| 1. 2D NMR discussion of compounds <b>9</b> and <b>18c</b> ..... | S3 |
| 2. HPLC purity of compounds <b>18c-f</b> and <b>23a-b</b> ..... | S4 |
| 3. Crystal structure determination of <b>16</b> .....           | S6 |
| 4. NMR spectra .....                                            | S7 |

## 1. 2D NMR discussion of compounds 9 and 18c

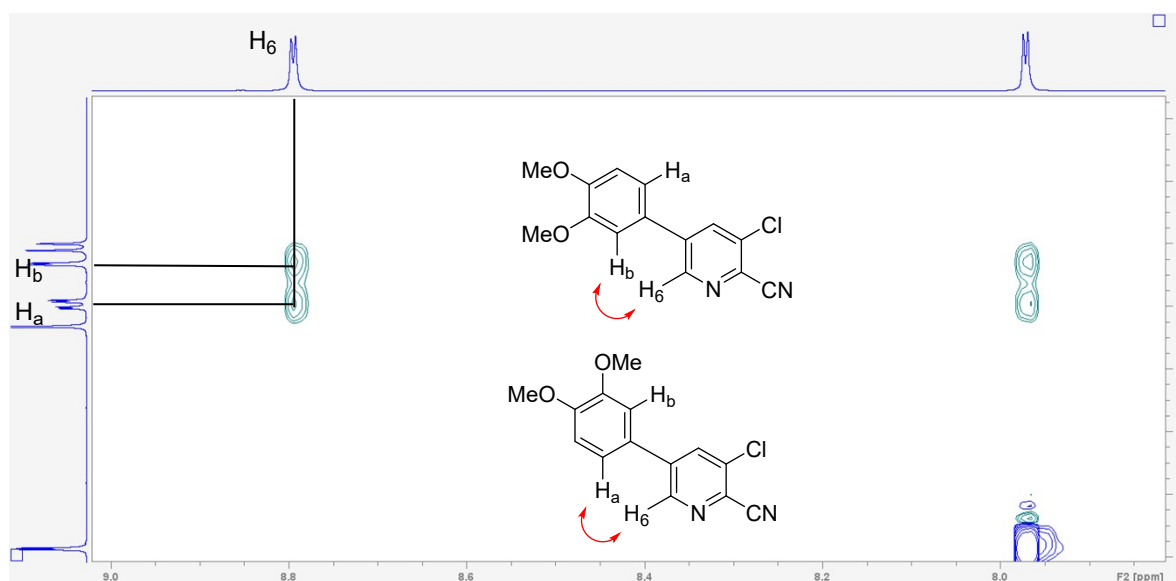

**Fig. S1.** NOESY spectrum of compound **9**. Red arrows represent the spatial interaction between protons of the rotational isomers.

The regioselectivity of the Suzuki reaction leading to the compound **9** was elucidated by a 2D NMR NOESY experiment (Fig.S1). The clear NOE correlations between H<sub>6</sub> and H<sub>a</sub>/H<sub>b</sub> confirmed that the 3,4-dimethoxyphenyl moiety is attached to position 5 of the pyridine scaffold. No NOE correlation would be observed in case coupling occurred at position 3.

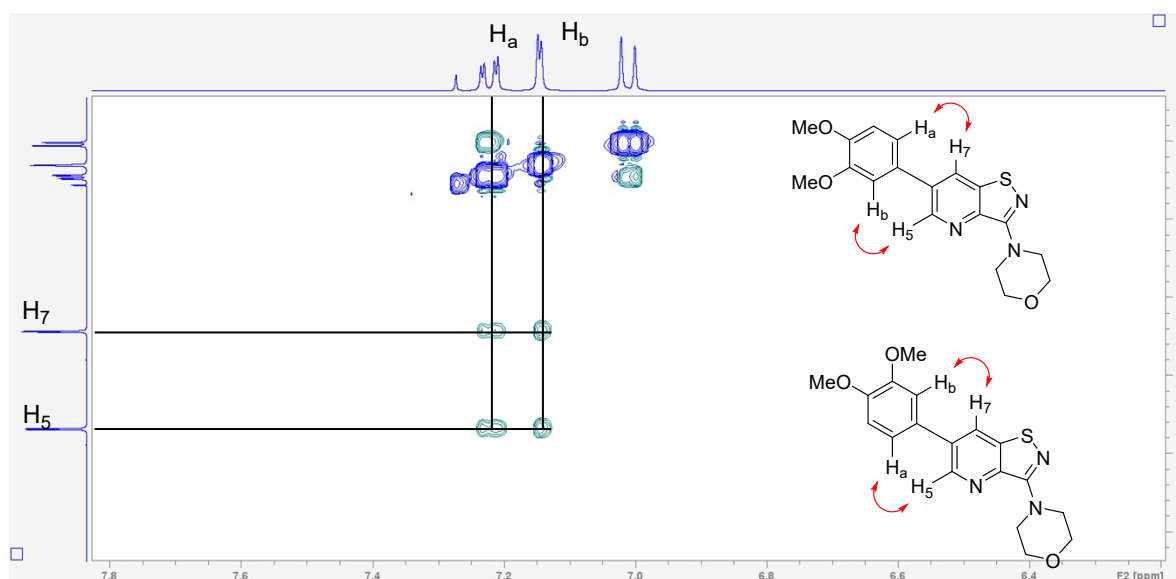

**Fig. S2.** NOESY spectrum of compound **18c**. Red arrows represent the spatial interaction between protons of the rotational isomers.

Similarly, the regioselectivity of nucleophilic substitution followed by Suzuki coupling leading to the library of 3,6- and 3,5-substituted isothiazolo[4,5-*b*]pyridine analogues was elucidated by a 2D NMR NOESY experiment (Fig.S2). For this purpose compound **18c** was chosen as an example of the prepared series. The clear NOE correlations between H<sub>a</sub> and H<sub>5</sub>/H<sub>7</sub> and H<sub>b</sub> and H<sub>5</sub>/H<sub>7</sub> proved that nucleophilic substitution occurs at position 3, while 3,4-dimethoxyphenyl ring is attached to position 6 of isothiazolo[4,5-*b*]pyridine scaffold.

## 2. HPLC purity of compounds 18c-f and 23a-b

**Table S1.** HPLC purity

| <b>Compound</b> | <b>Retention time (min)</b> | <b>% Purity Area</b> |
|-----------------|-----------------------------|----------------------|
| <b>18c</b>      | <b>12.22</b>                | <b>95.5</b>          |
| <b>18d</b>      | <b>13.18</b>                | <b>97.6</b>          |
| <b>18e</b>      | <b>12.45</b>                | <b>95.3</b>          |
| <b>18f</b>      | <b>12.43</b>                | <b>97.4</b>          |
| <b>23a</b>      | <b>12.34</b>                | <b>96.2</b>          |
| <b>23b</b>      | <b>13.37</b>                | <b>95.5</b>          |

UV detection wavelength 254 nm, Shimadzu Prominence-i LC-2030C 3D Plus instrument, Shim-pack GISS-HP column, 3 $\mu$ m C18, 2.1x100mm; method: 0 (0% D/ 100% A)→ 100% D (100% D/ 0% A) within 12 min, 100% D for 6 min (A: water + 0.1% formic acid, D: MeOH + 0.1% formic acid). The intensity of the ions (arbitrary units) is shown on the y-axis, and the retention time (in min) of the ions is shown on the x-axis.

**4-(6-(3,4-Dimethoxyphenyl)isothiazolo[4,5-*b*]pyridin-3-yl)morpholine (18c)**

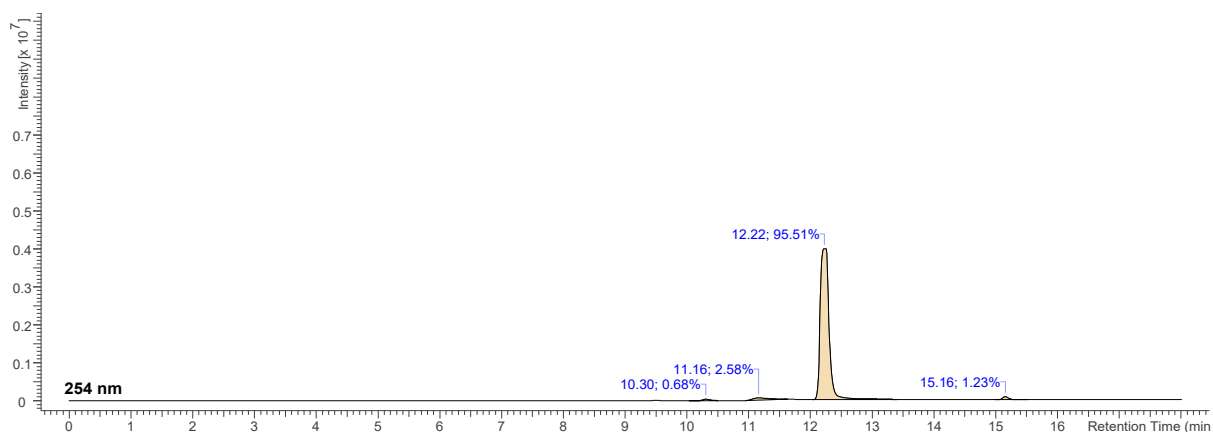

**(2S,6R)-4-(6-(3,4-Dimethoxyphenyl)isothiazolo[4,5-*b*]pyridin-3-yl)-2,6-dimethylmorpholine (18d)**

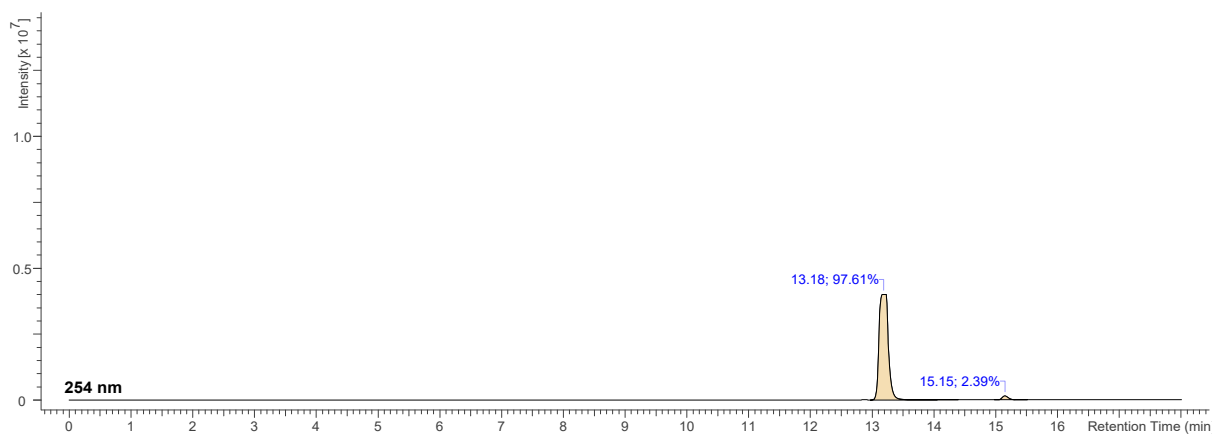

**N-((1-(6-(3,4-dimethoxyphenyl)isothiazolo[4,5-*b*]pyridin-3-yl)piperidin-3-yl)methyl)cyclopropanecarboxamide (18e)**

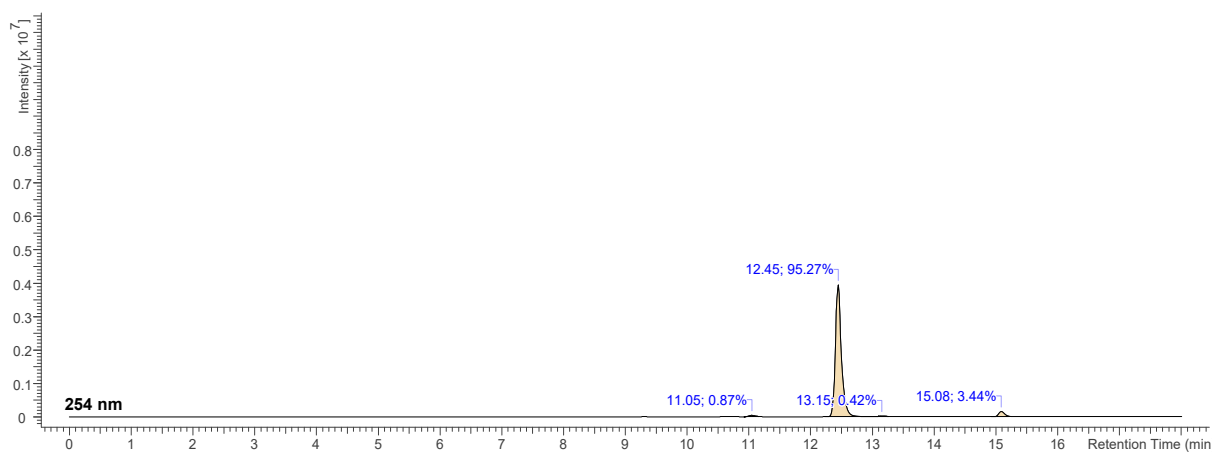

### 6-(3,4-Dimethoxyphenyl)-3-isopropoxyisothiazolo[4,5-*b*]pyridine (18f)

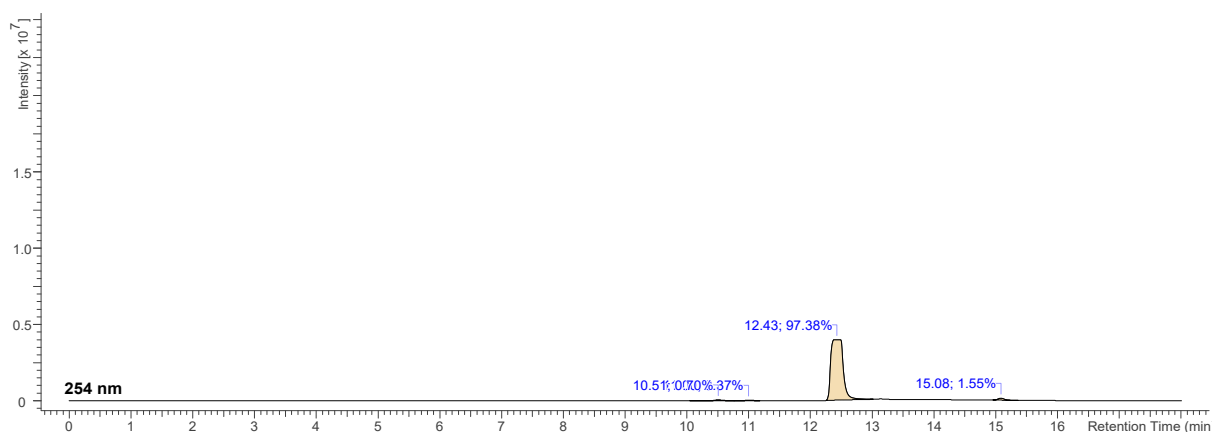

### 4-(5-(3,4-Dimethoxyphenyl)isothiazolo[4,5-*b*]pyridin-3-yl)morpholine (23a)

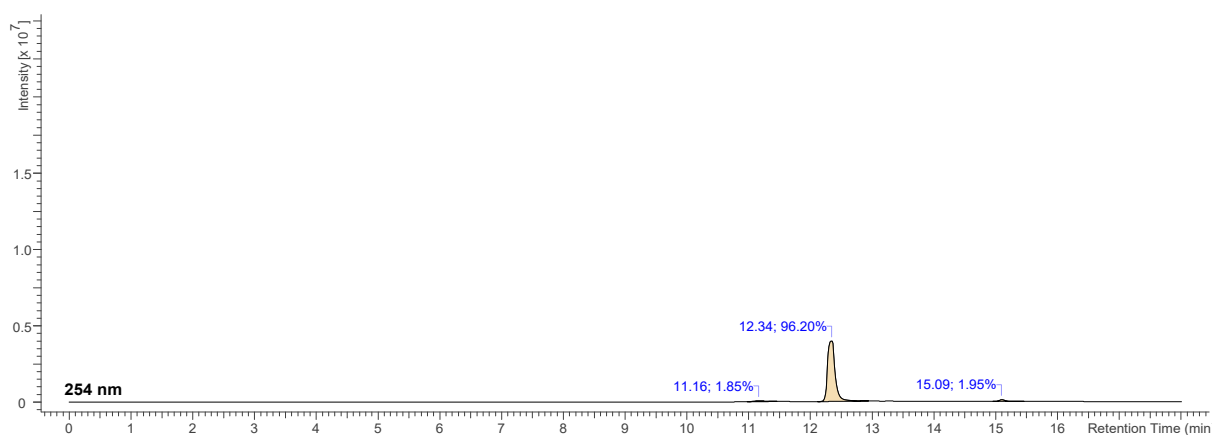

### (2*S*,6*R*)-4-(5-(3,4-Dimethoxyphenyl)isothiazolo[4,5-*b*]pyridin-3-yl)-2,6-dimethylmorpholine (23b)

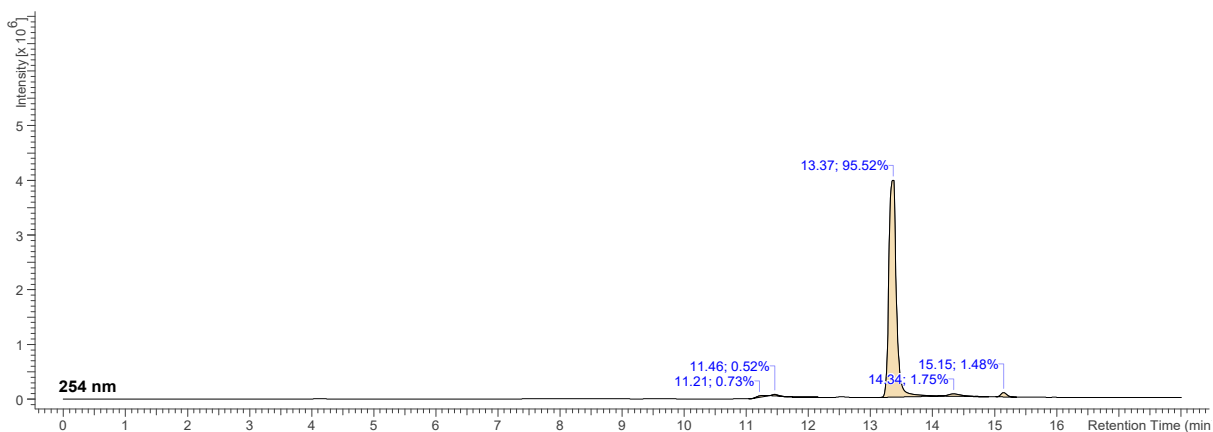

### 3. Crystal structure determination of 16

**Table S2.** Crystal data, data collection and structure refinement details for **16**.

| Compound                                      | <b>16</b>                                                      |
|-----------------------------------------------|----------------------------------------------------------------|
| Molecular formula                             | C <sub>6</sub> H <sub>2</sub> Br <sub>2</sub> N <sub>2</sub> S |
| M (g.mol <sup>-1</sup> )                      | 293.98                                                         |
| Crystal system                                | monoclinic                                                     |
| Space group                                   | P2 <sub>1</sub> /n                                             |
| a (Å)                                         | 4.0454(3)                                                      |
| b (Å)                                         | 10.5096(8)                                                     |
| c (Å)                                         | 19.0866(16)                                                    |
| α (°)                                         | 90                                                             |
| β (°)                                         | 93.419(7)                                                      |
| γ (°)                                         | 90                                                             |
| Volume (Å <sup>3</sup> )                      | 810.03(11)                                                     |
| Z                                             | 4                                                              |
| ρ <sub>calc</sub> (g.cm <sup>-3</sup> )       | 2.411                                                          |
| μ (mm <sup>-1</sup> )                         | 10.193                                                         |
| F(000)                                        | 552.0                                                          |
| Crystal size (mm <sup>3</sup> )               | 0.3 × 0.25 × 0.15                                              |
| Reflections collected                         | 8601                                                           |
| Independent reflections                       | 1638 [R <sub>int</sub> = 0.0322, R <sub>sigma</sub> = 0.0260]  |
| Data/restraints/parameters                    | 1638/0/100                                                     |
| Final R indexes [I ≥ 2σ(I)]                   | 1.082                                                          |
| Final R indexes [all data]                    | R <sub>1</sub> = 0.0316, wR <sub>2</sub> = 0.0582              |
| Goodness-of-fit on F <sup>2</sup>             | R <sub>1</sub> = 0.0499, wR <sub>2</sub> = 0.0645              |
| Largest diff. peak/hole (e. Å <sup>-3</sup> ) | 0.52/-0.47                                                     |

## 4. NMR spectra

### 3-Chloro-5-(3,4-dimethoxyphenyl)pyridine-2-carbonitrile (9)

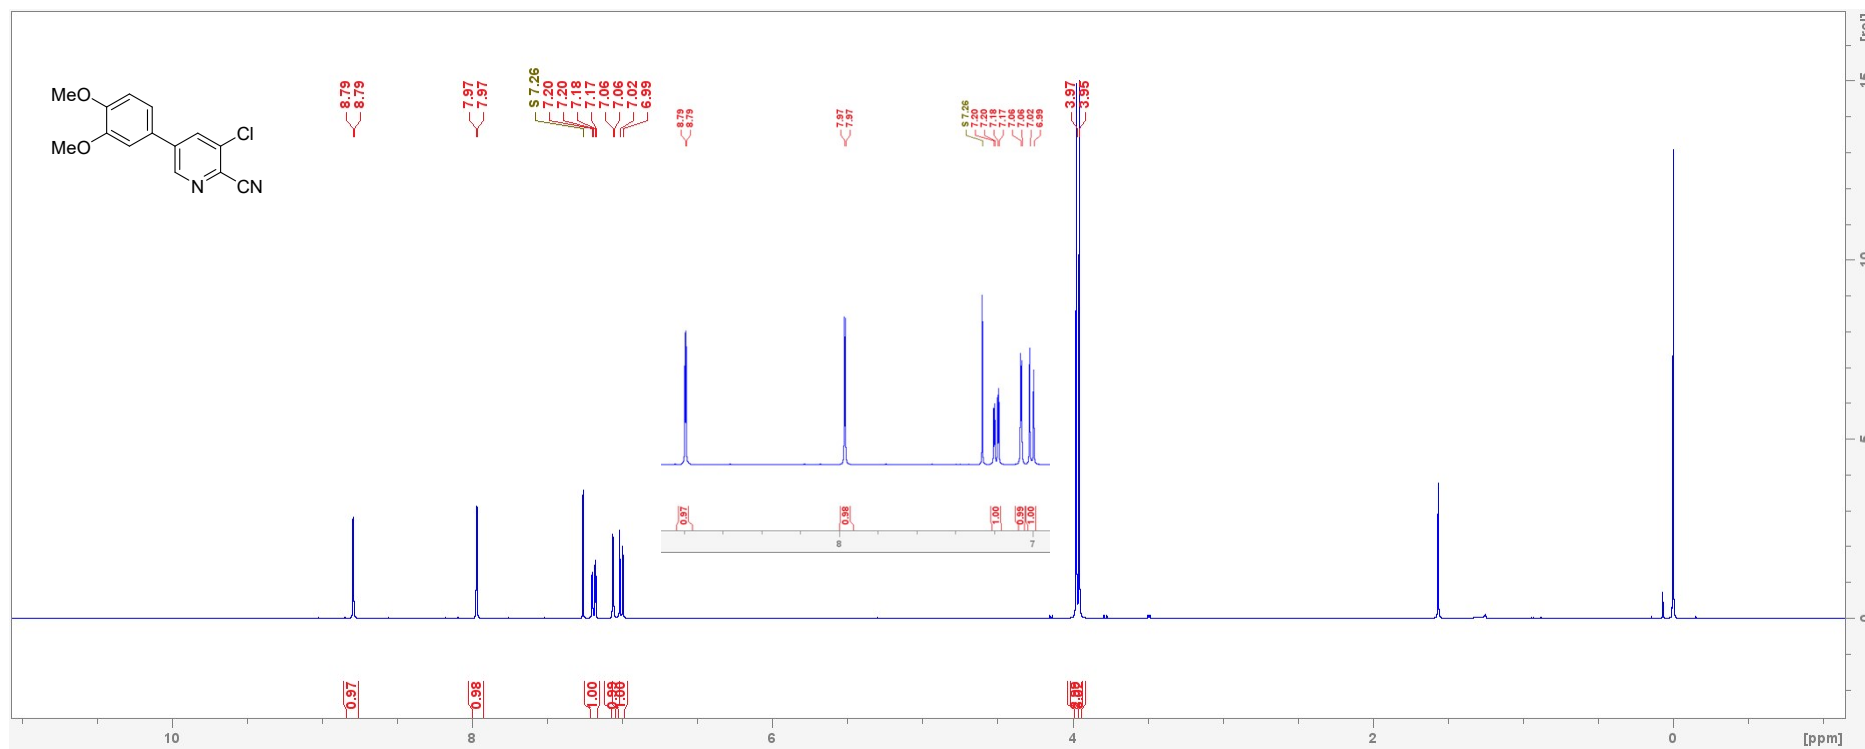

<sup>1</sup>H NMR spectrum (400 MHz, CDCl<sub>3</sub>) of 9

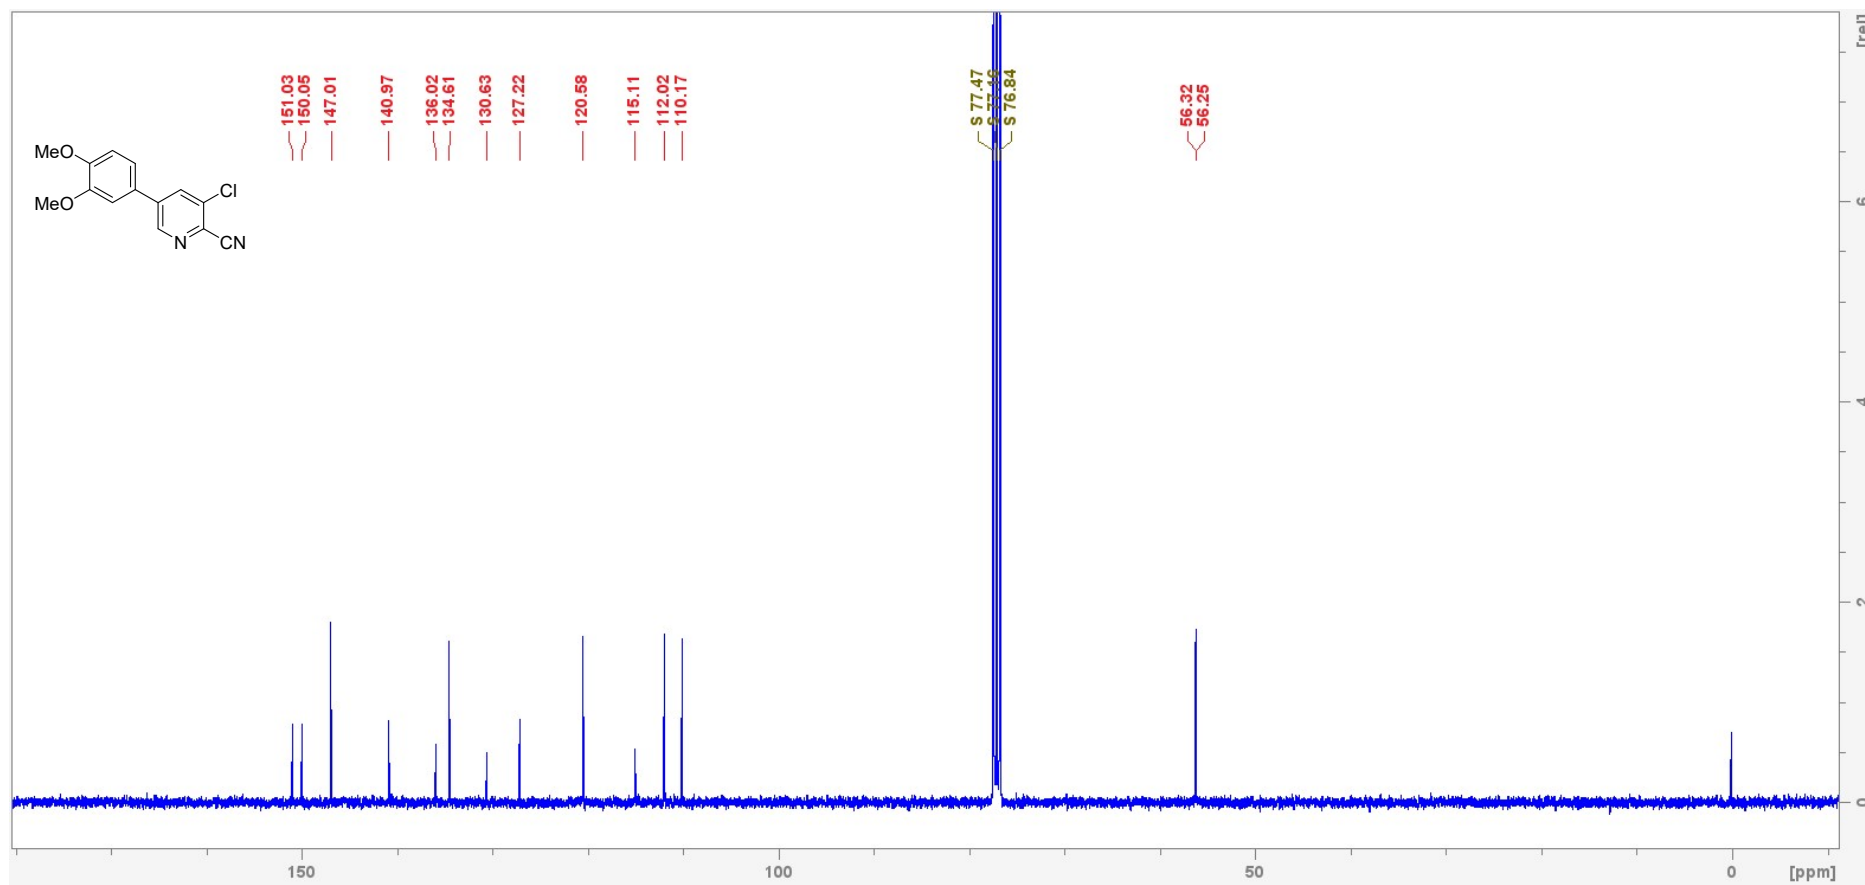

<sup>13</sup>C NMR spectrum (151 MHz, CDCl<sub>3</sub>) of **9**



5-(3,4-Dimethoxyphenyl)-3-((4-methoxybenzyl)thio)picolinonitrile (**11**)

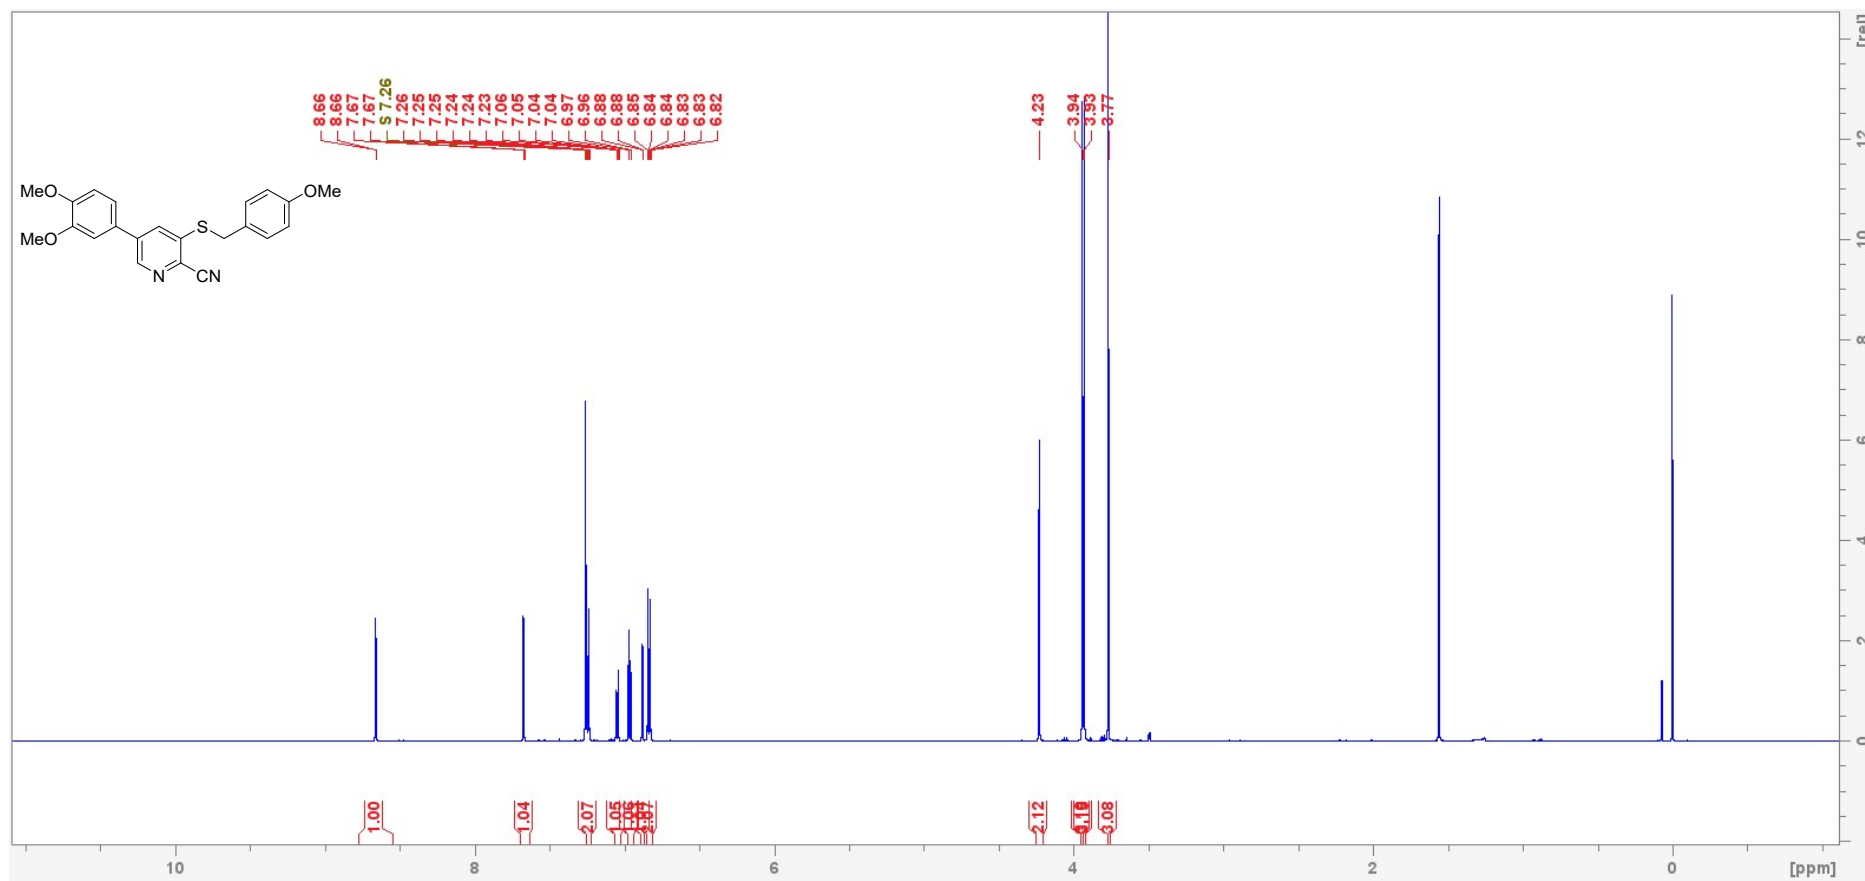

<sup>1</sup>H NMR spectrum (600 MHz, CDCl<sub>3</sub>) of **11**

Zoom-in on the aromatic area:

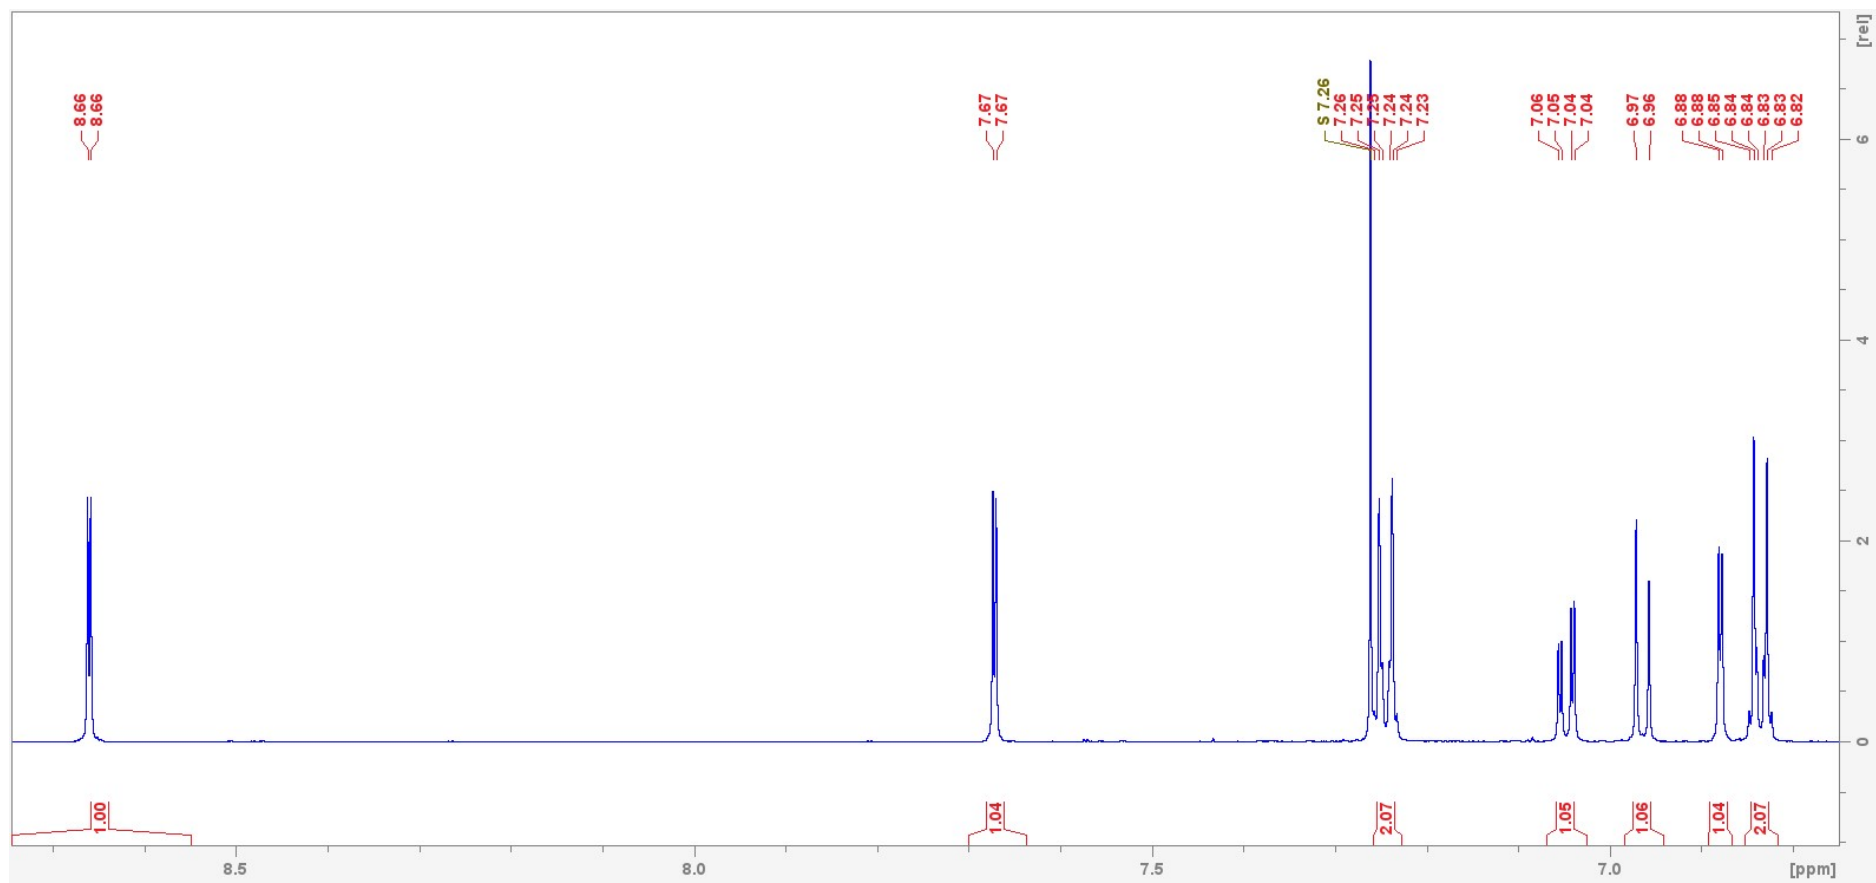

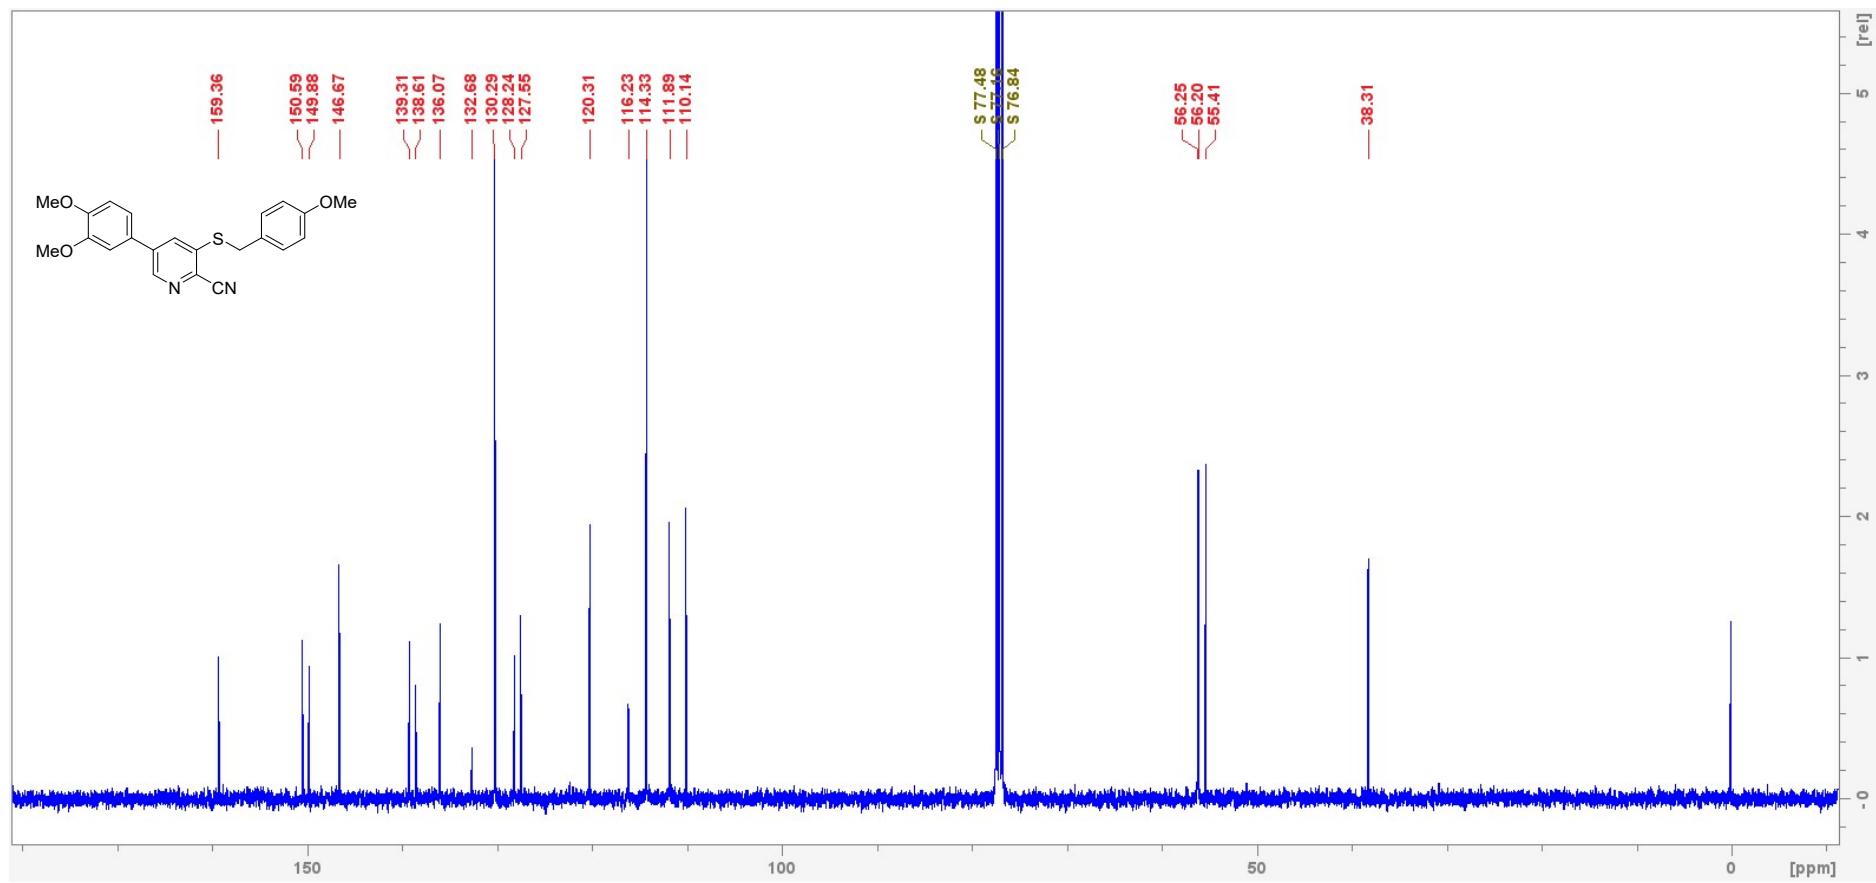

<sup>13</sup>C NMR spectrum (101 MHz, CDCl<sub>3</sub>) of **11**

**5-Bromo-3-((4-methoxybenzyl)thio)picolinonitrile (15)**

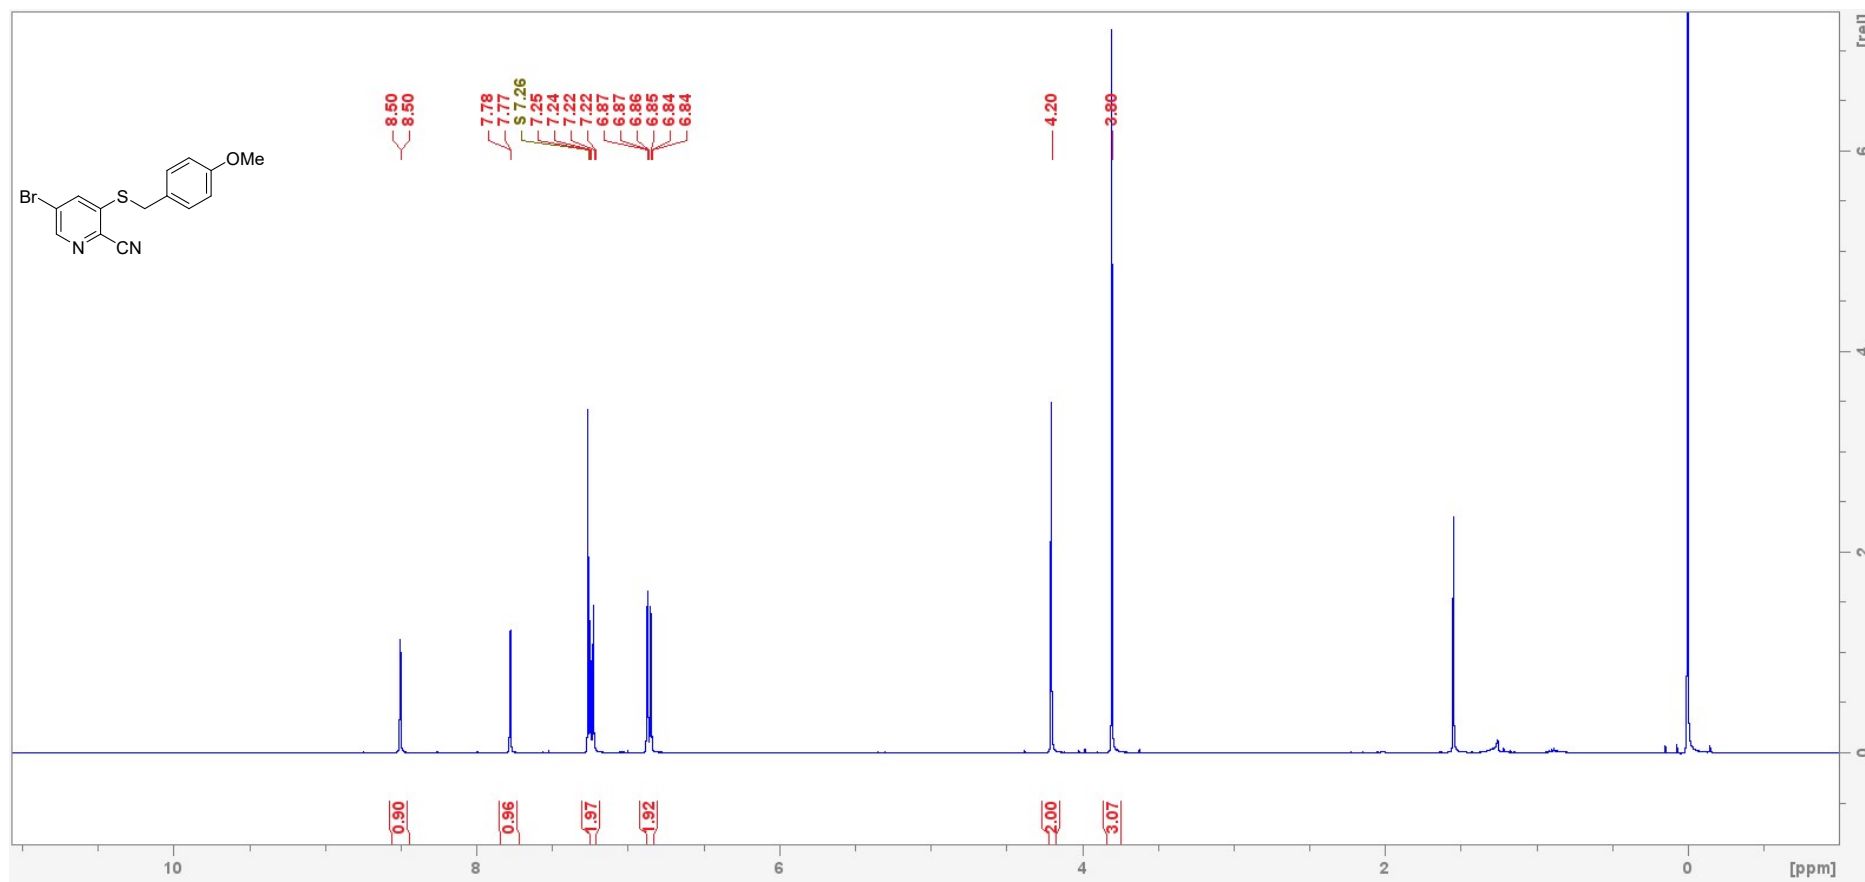

<sup>1</sup>H NMR spectrum (400 MHz, CDCl<sub>3</sub>) of **15**

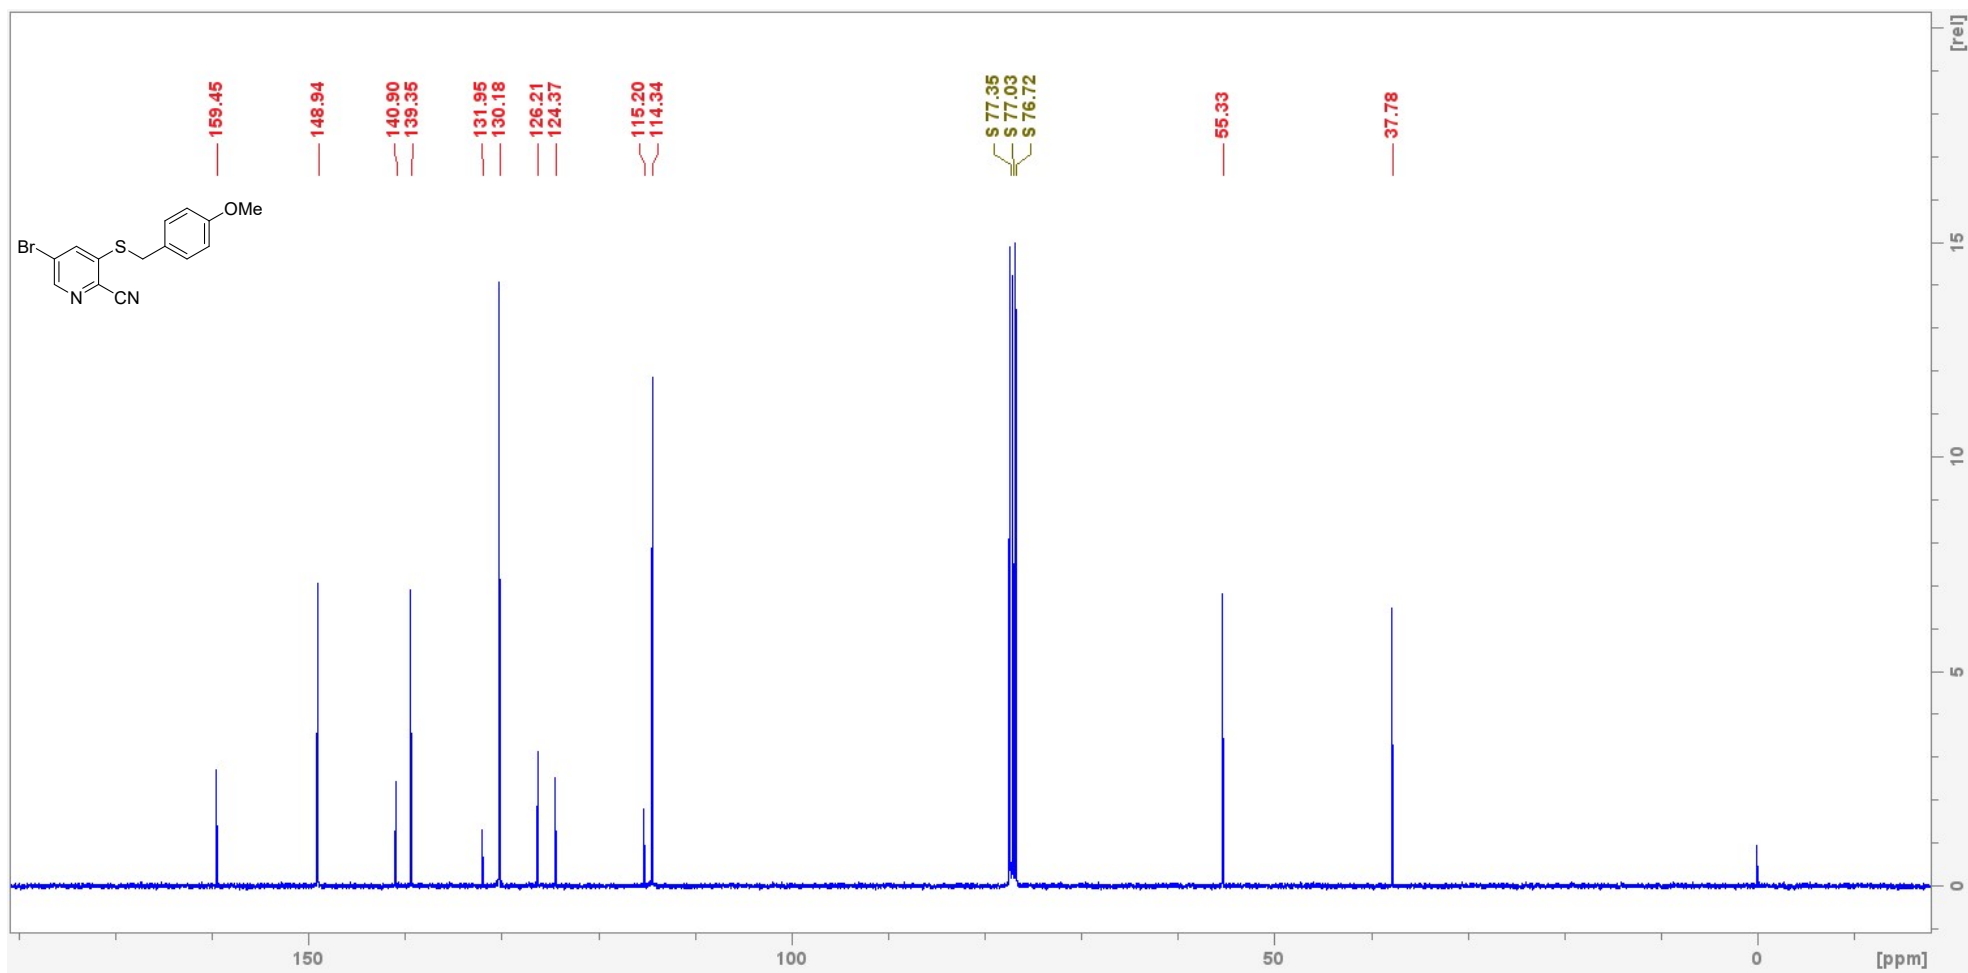

<sup>13</sup>C NMR spectrum (101 MHz, CDCl<sub>3</sub>) of **15**

### 3,6-Dibromoisothiazolo[4,5-*b*]pyridine (16)

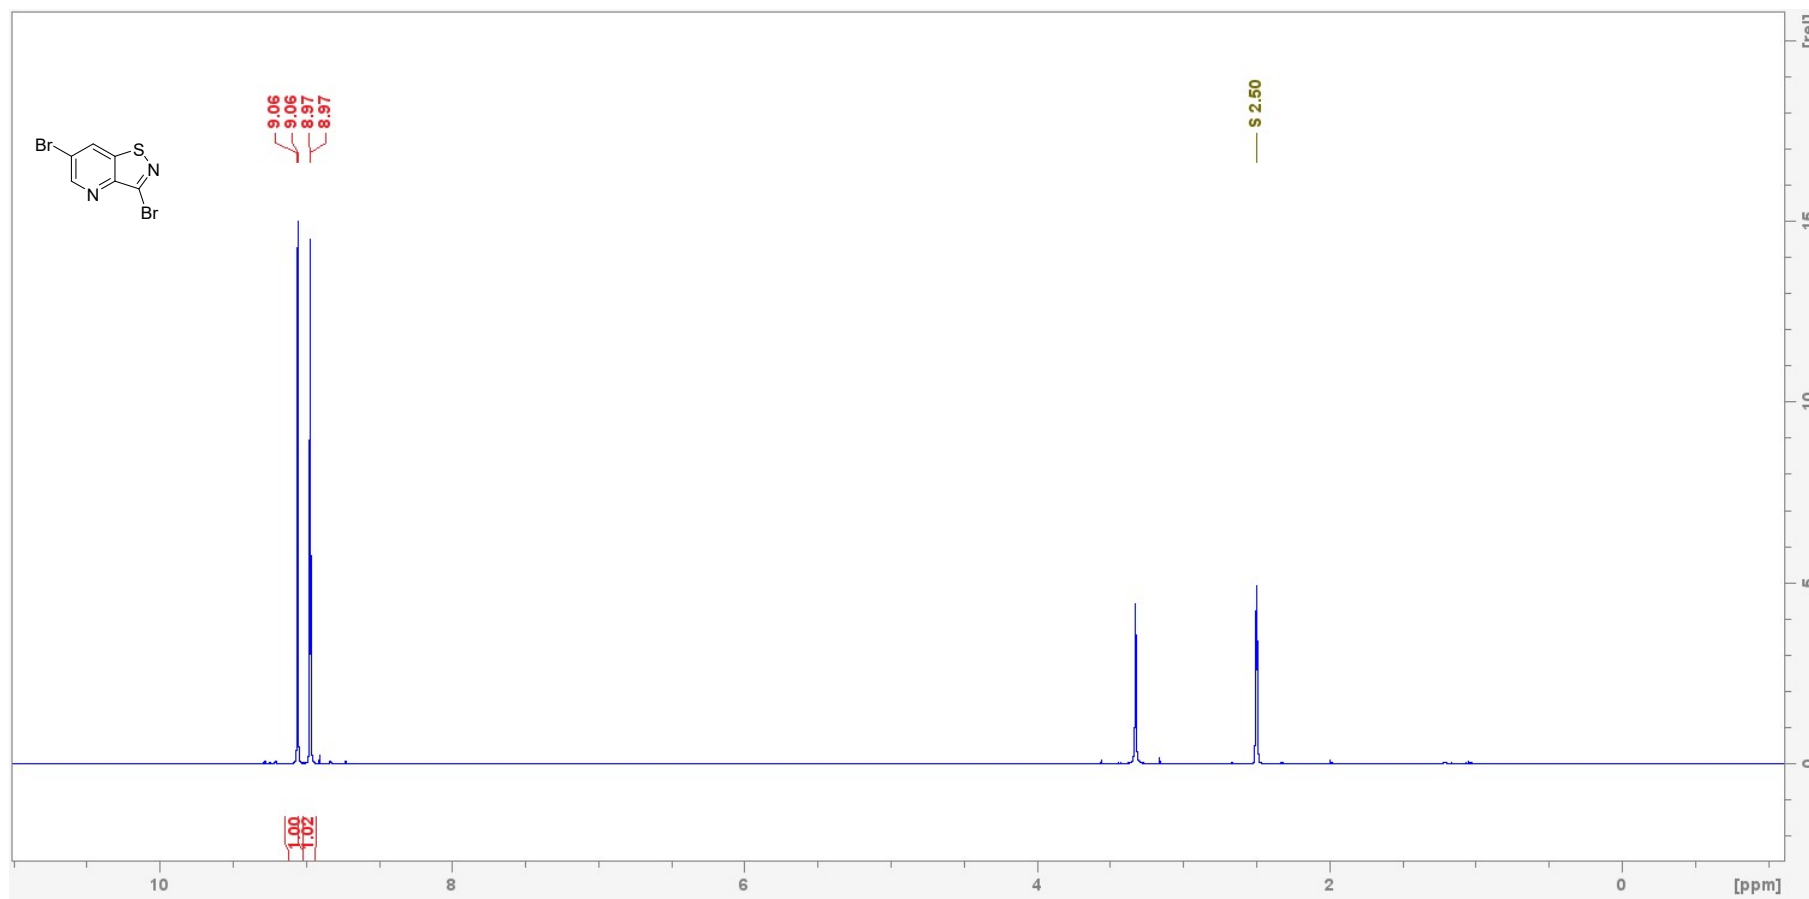

$^1\text{H}$  NMR spectrum (400 MHz,  $\text{DMSO-}d_6$ ) of **16**

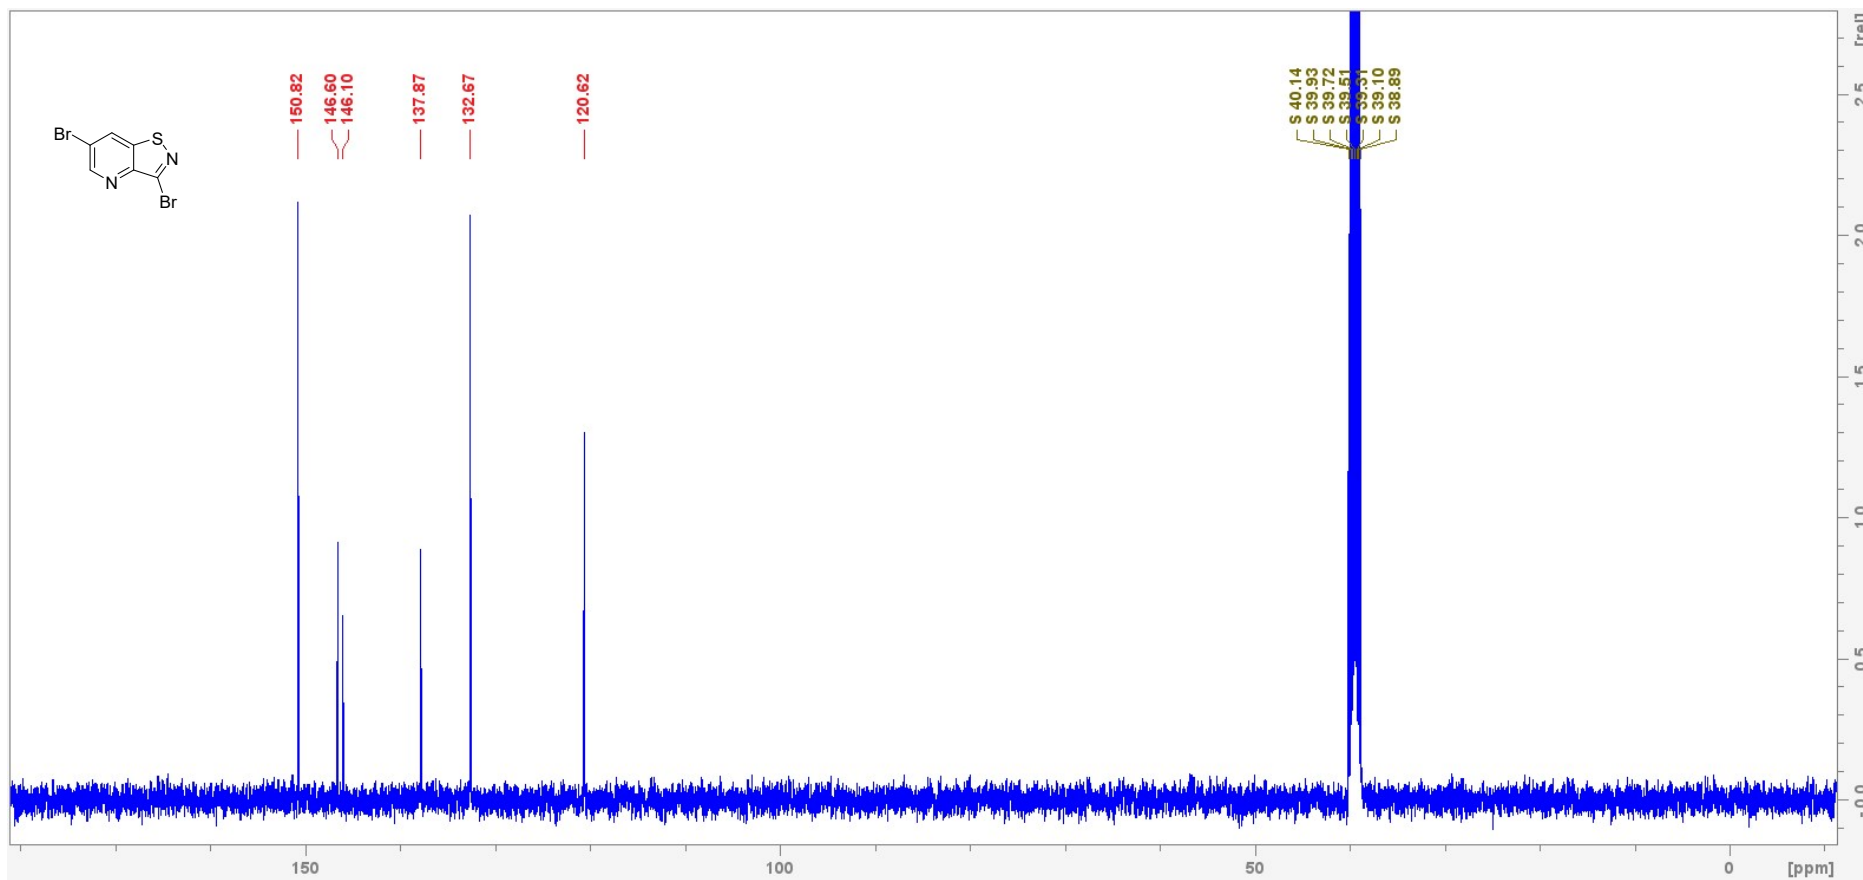

$^{13}\text{C}$  NMR spectrum (101 MHz,  $\text{DMSO-}d_6$ ) of **16**

**6-Bromoisothiazolo[4,5-*b*]pyridin-3-amine (17a)**

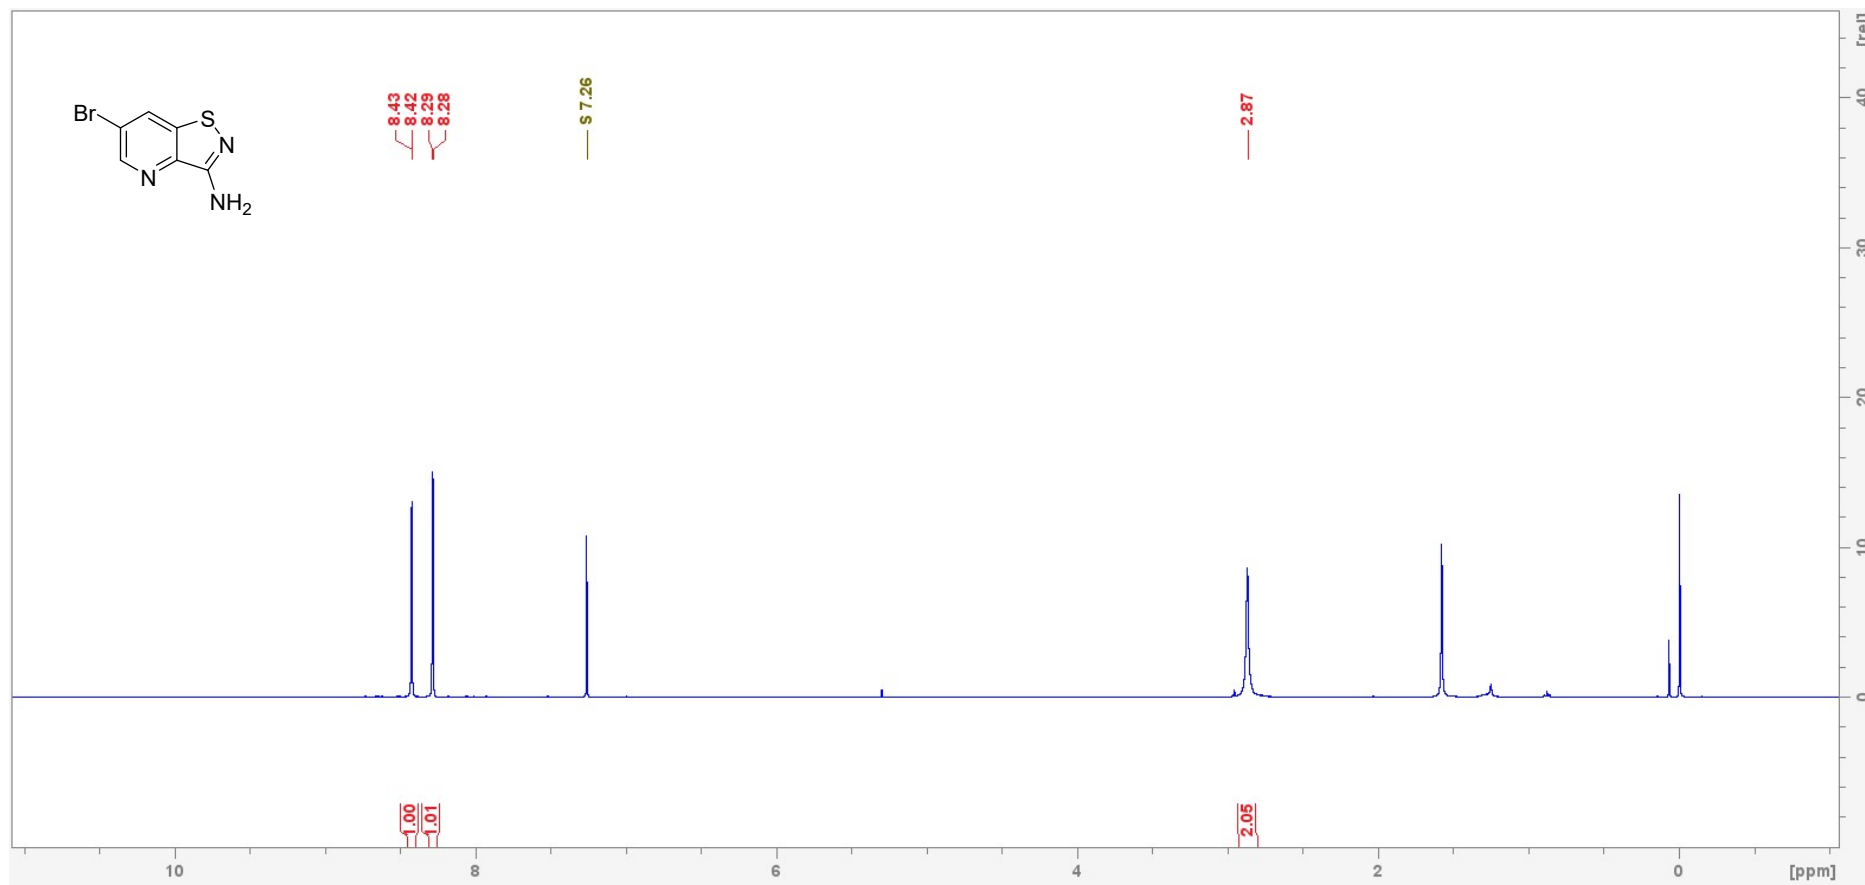

<sup>1</sup>H NMR spectrum (400 MHz, CDCl<sub>3</sub>) of **17a**



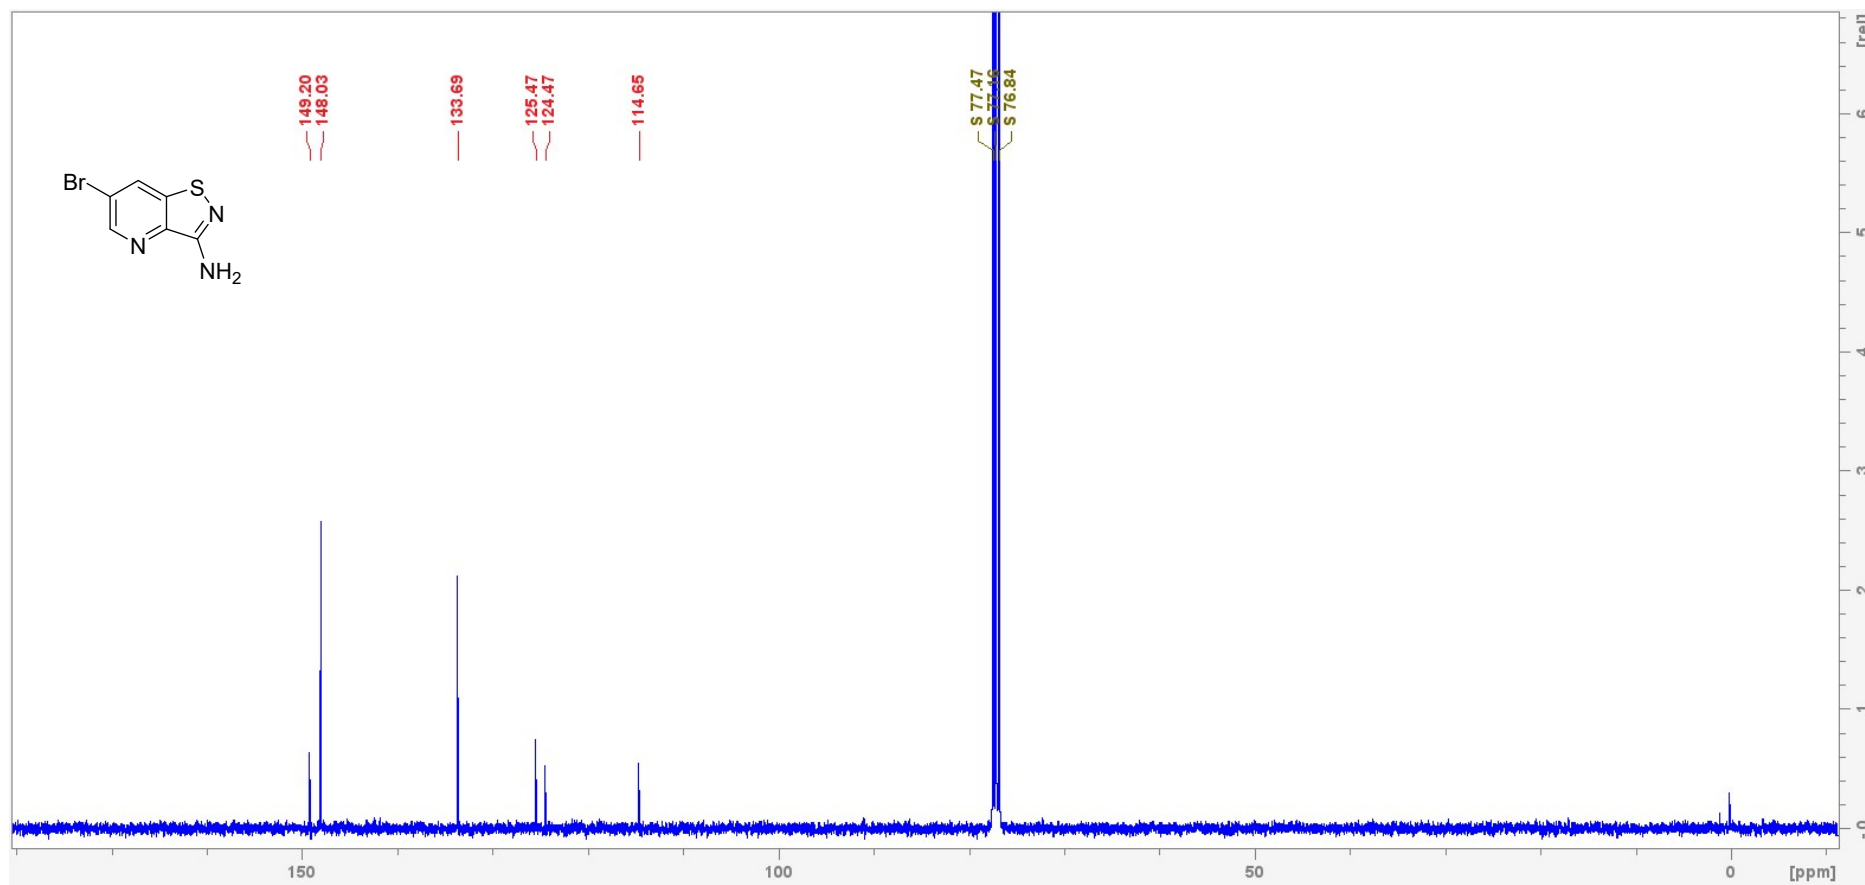

$^{13}\text{C}$  NMR spectrum (101 MHz,  $\text{CDCl}_3$ ) of **17a**

6-Bromo-N-(tetrahydro-2H-pyran-4-yl)isothiazolo[4,5-b]pyridin-3-amine (17b)

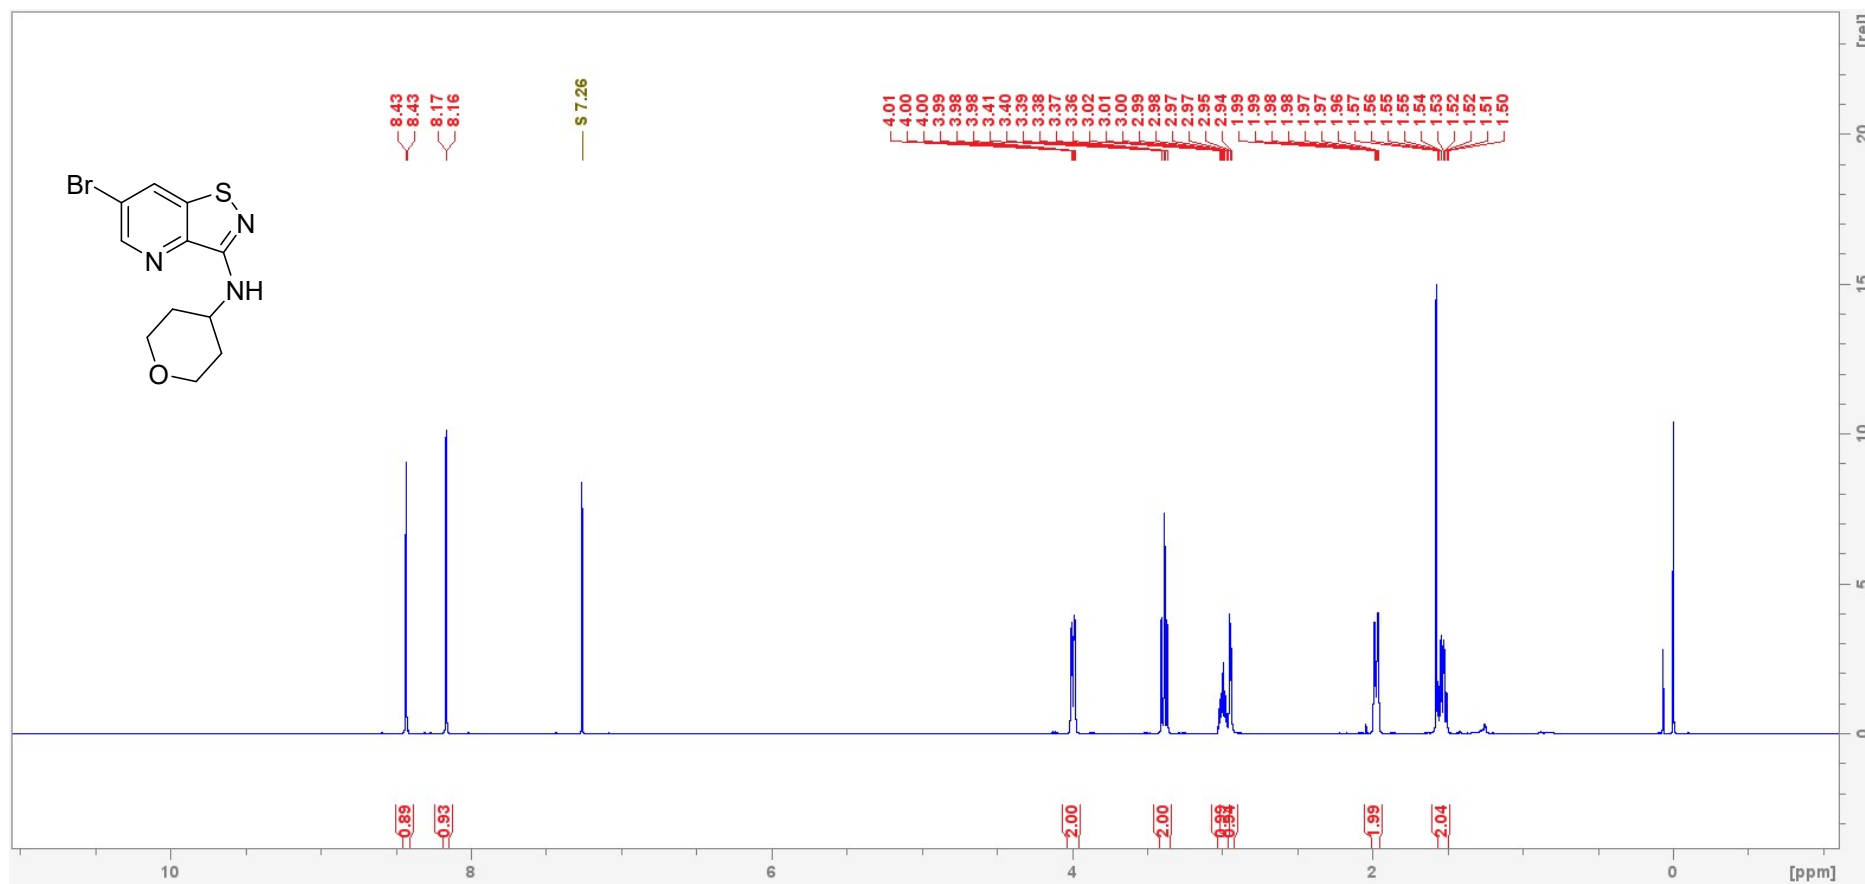

<sup>1</sup>H NMR spectrum (600 MHz, CDCl<sub>3</sub>) of 17b

Zoom-in on the aliphatic area:

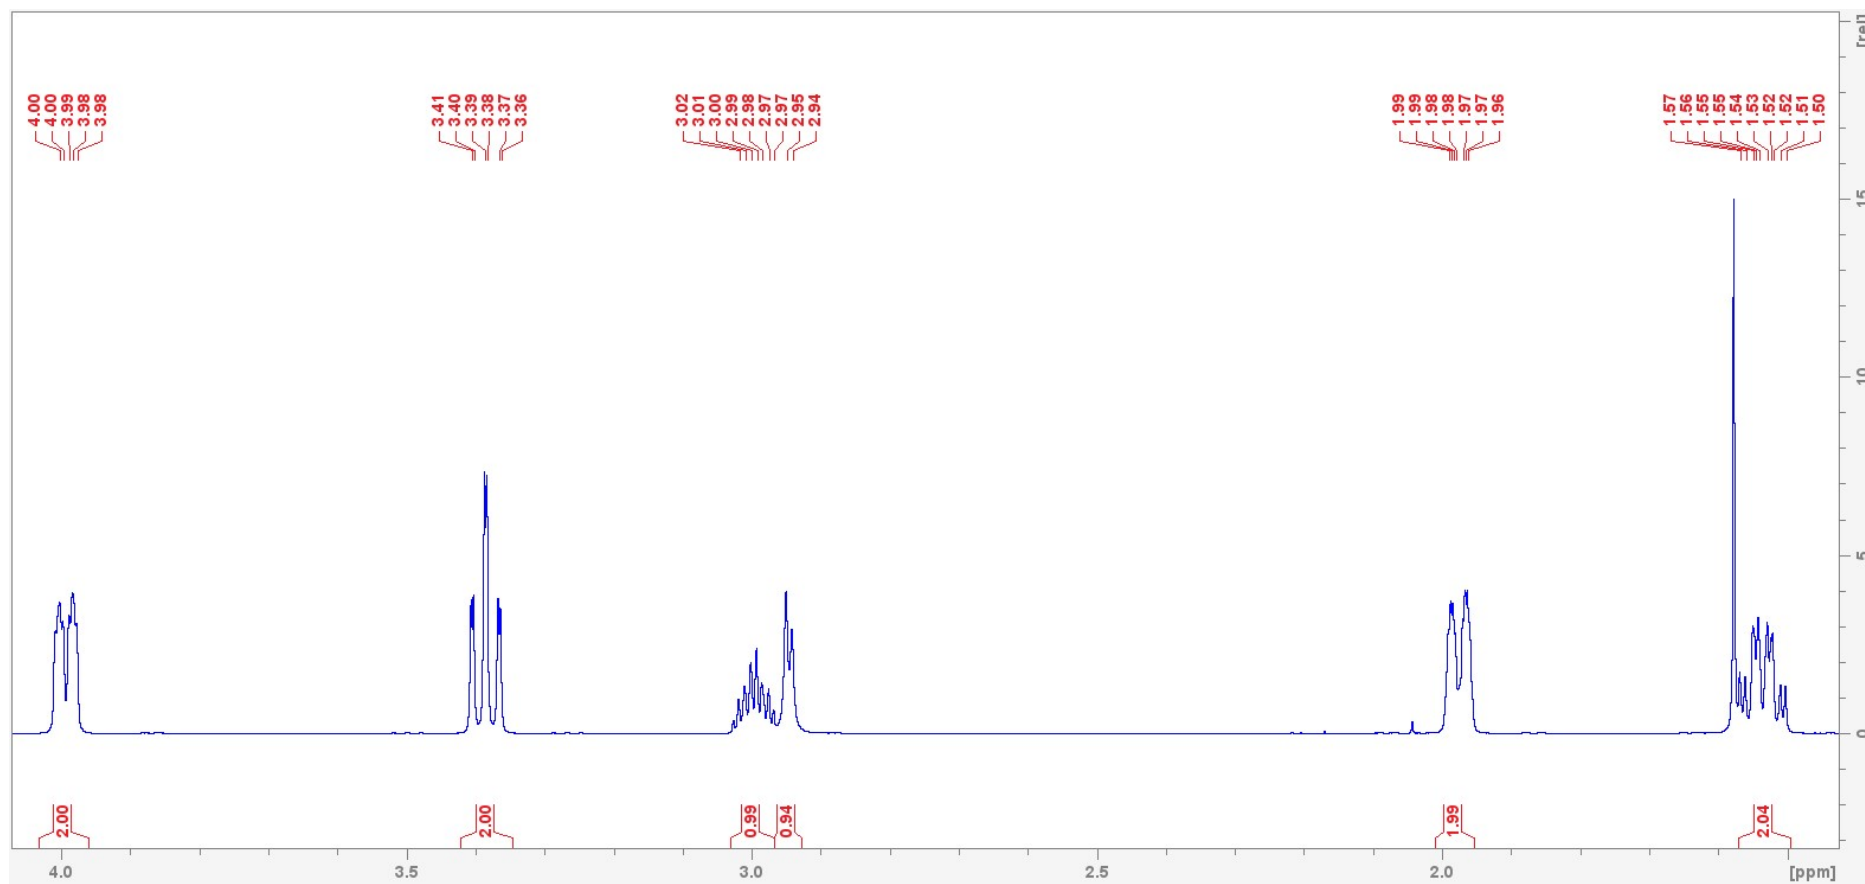

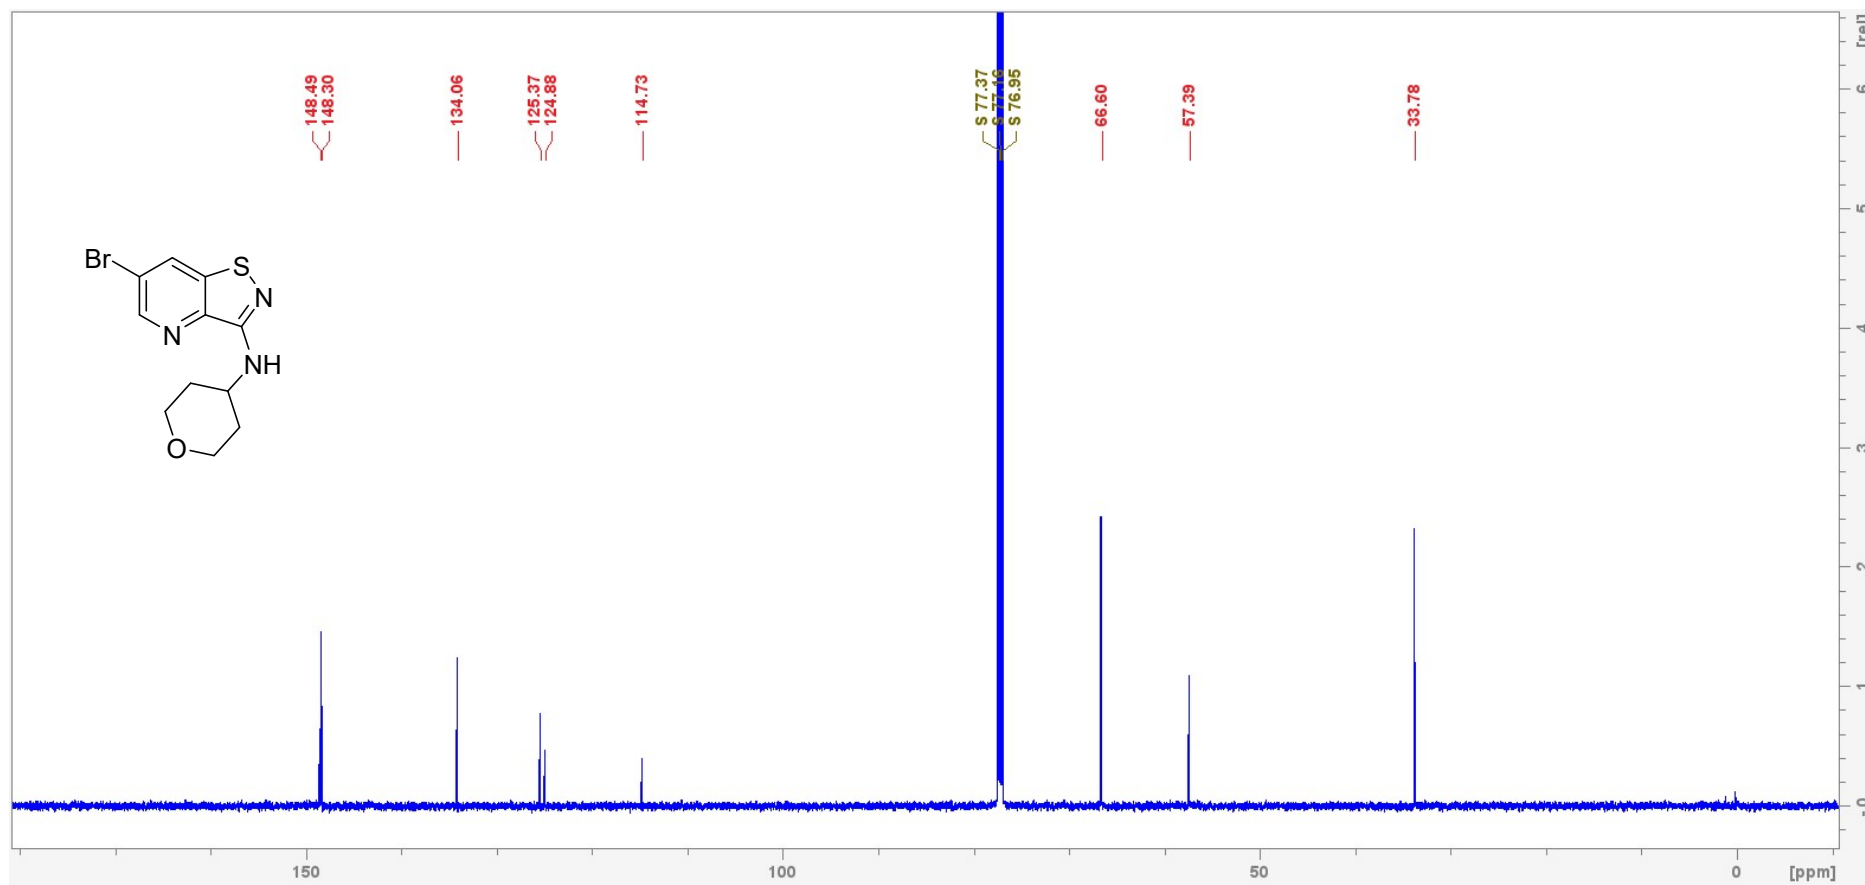

<sup>13</sup>C NMR spectrum (151 MHz, CDCl<sub>3</sub>) of **17b**

4-(6-Bromoisothiazolo[4,5-*b*]pyridin-3-yl)morpholine (17c)

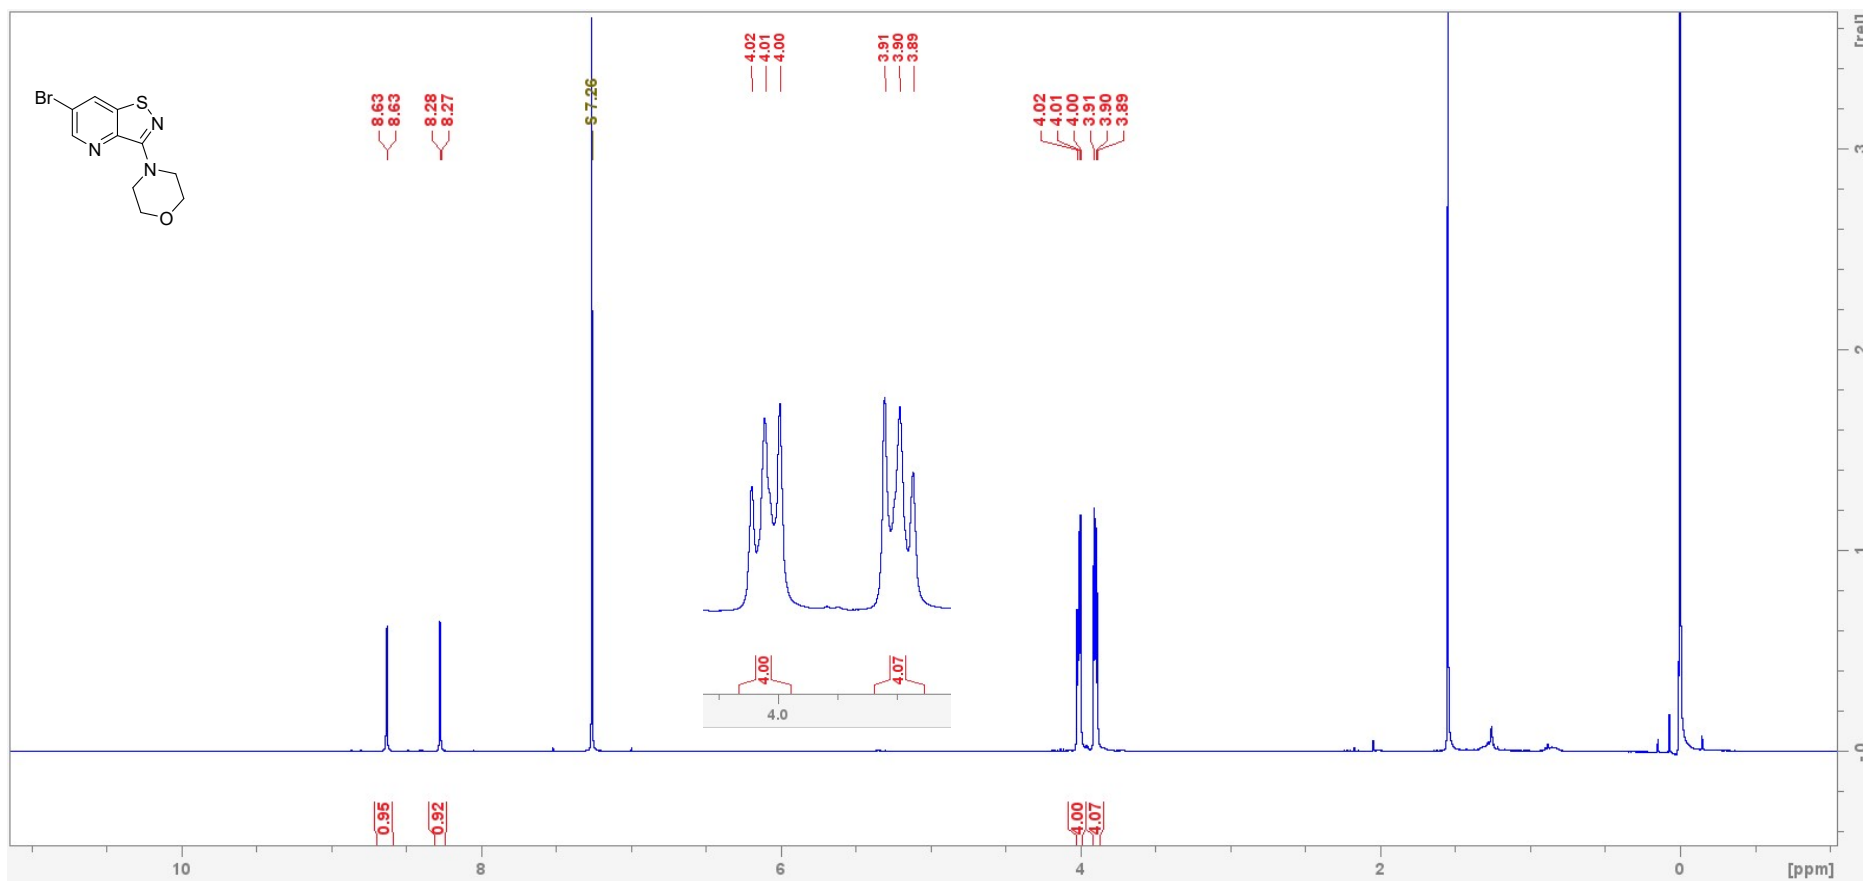

<sup>1</sup>H NMR spectrum (400 MHz, CDCl<sub>3</sub>) of 17c

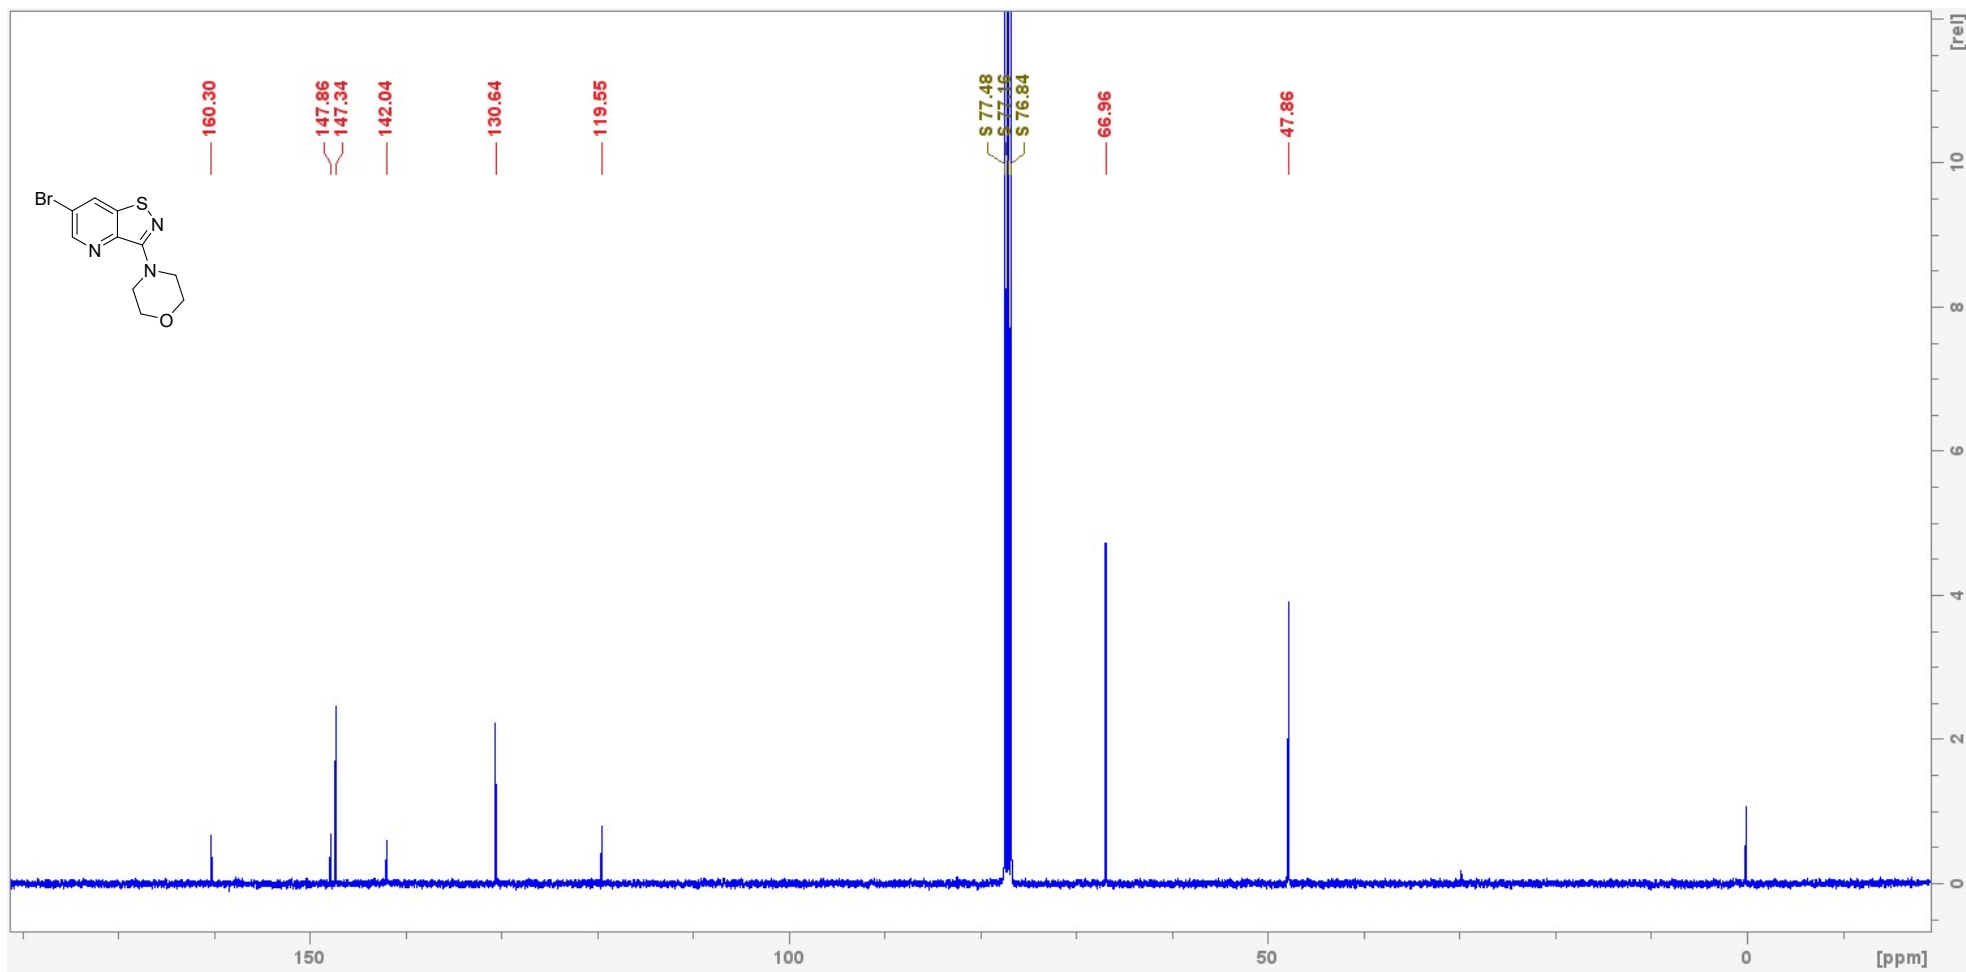

<sup>13</sup>C NMR spectrum (101 MHz, CDCl<sub>3</sub>) of 17c

**(2S,6R)-4-(6-Bromoisothiazolo[4,5-*b*]pyridin-3-yl)-2,6-dimethylmorpholine (17d)**

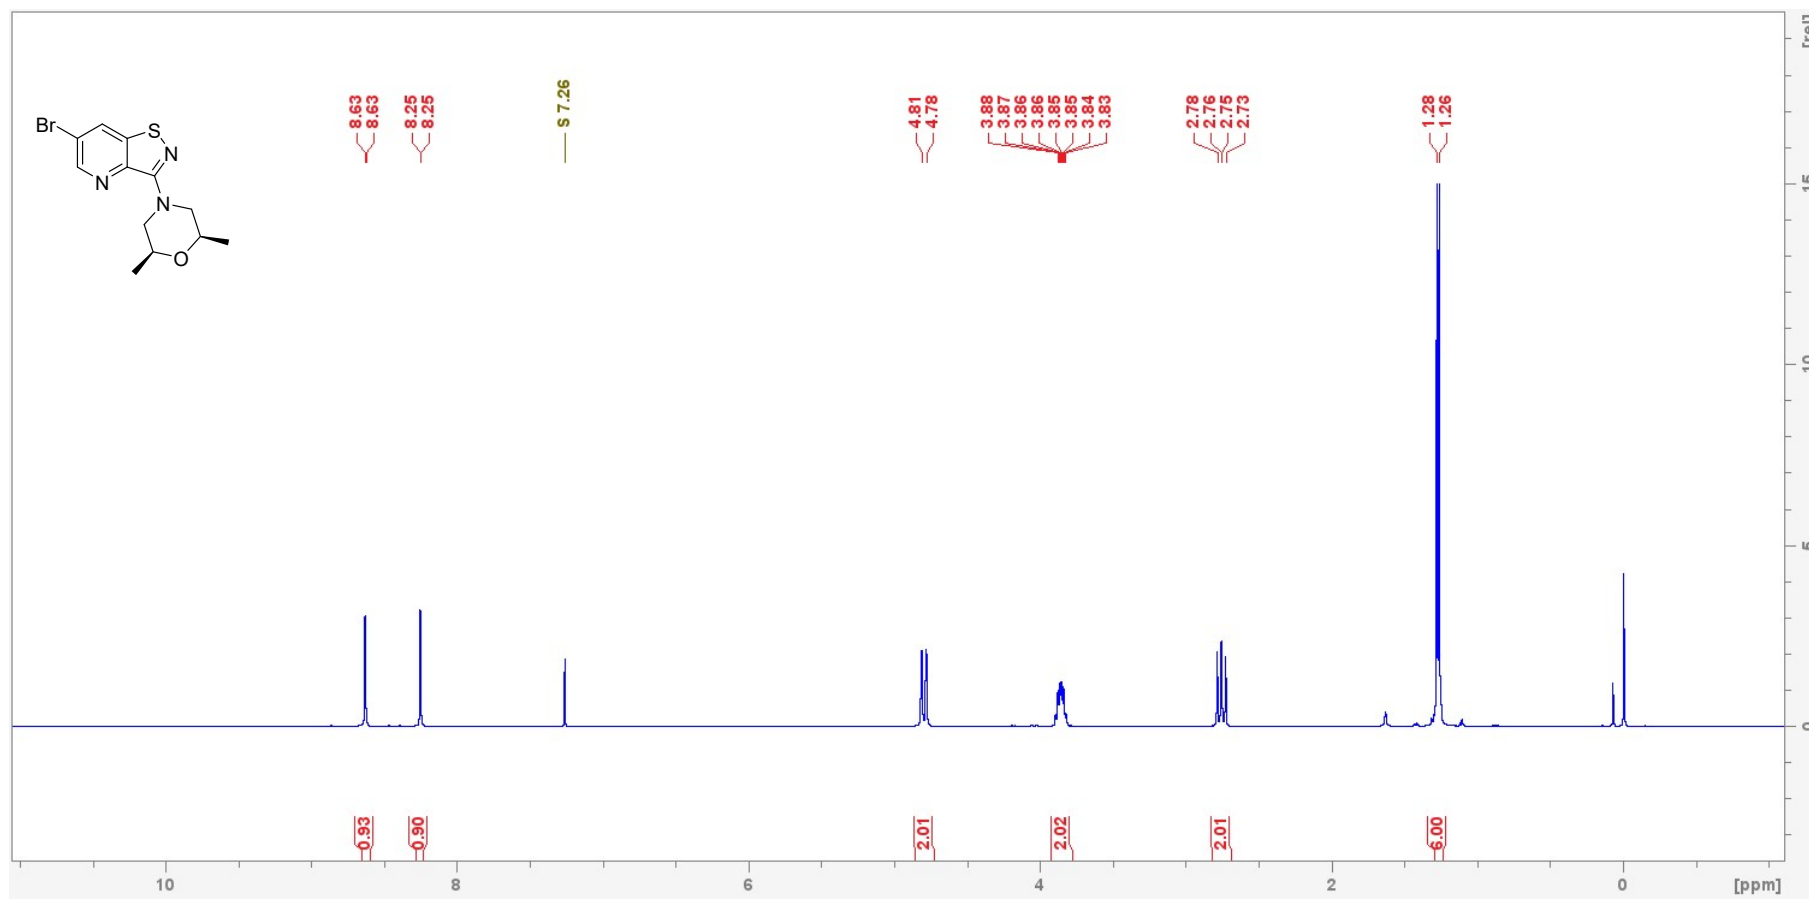

<sup>1</sup>H NMR spectrum (400 MHz, CDCl<sub>3</sub>) of **17d**

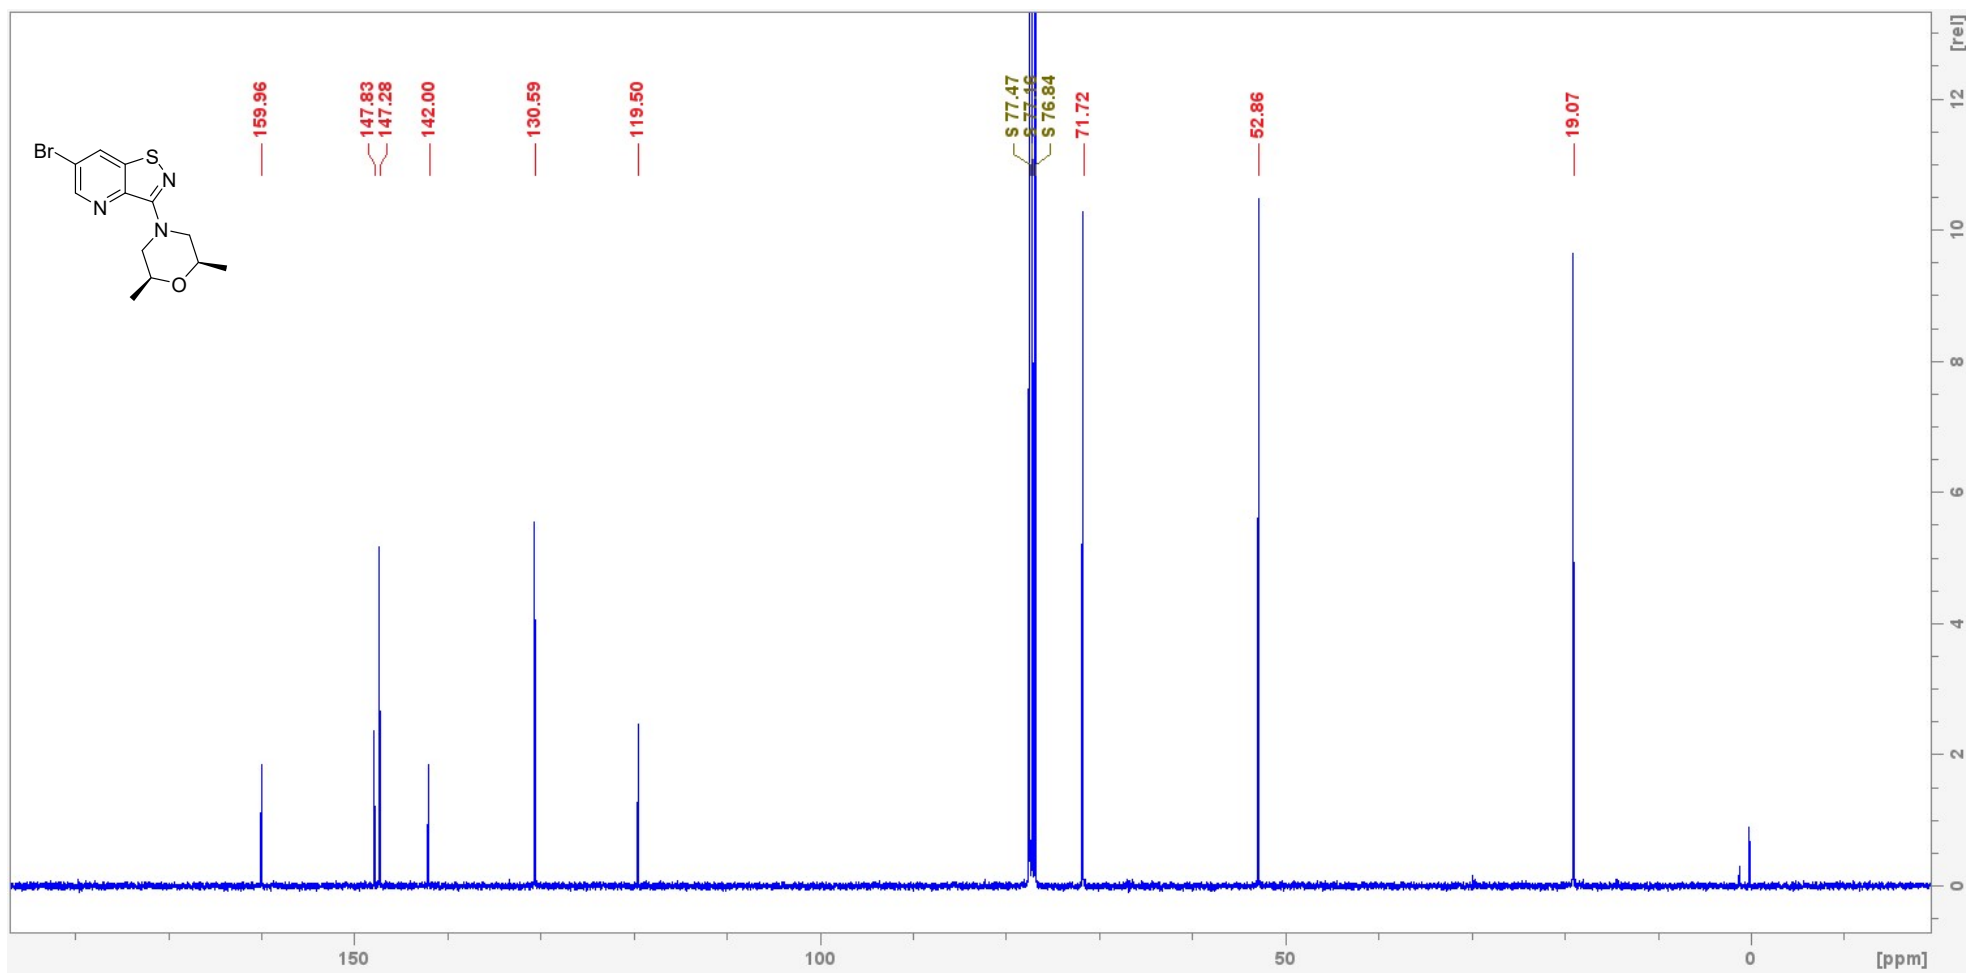

<sup>13</sup>C NMR spectrum (101 MHz, CDCl<sub>3</sub>) of 17d



Tert-butyl ((1-(6-bromoisothiazolo[4,5-*b*]pyridin-3-yl)piperidin-3-yl)methyl)carbamate (17ea)

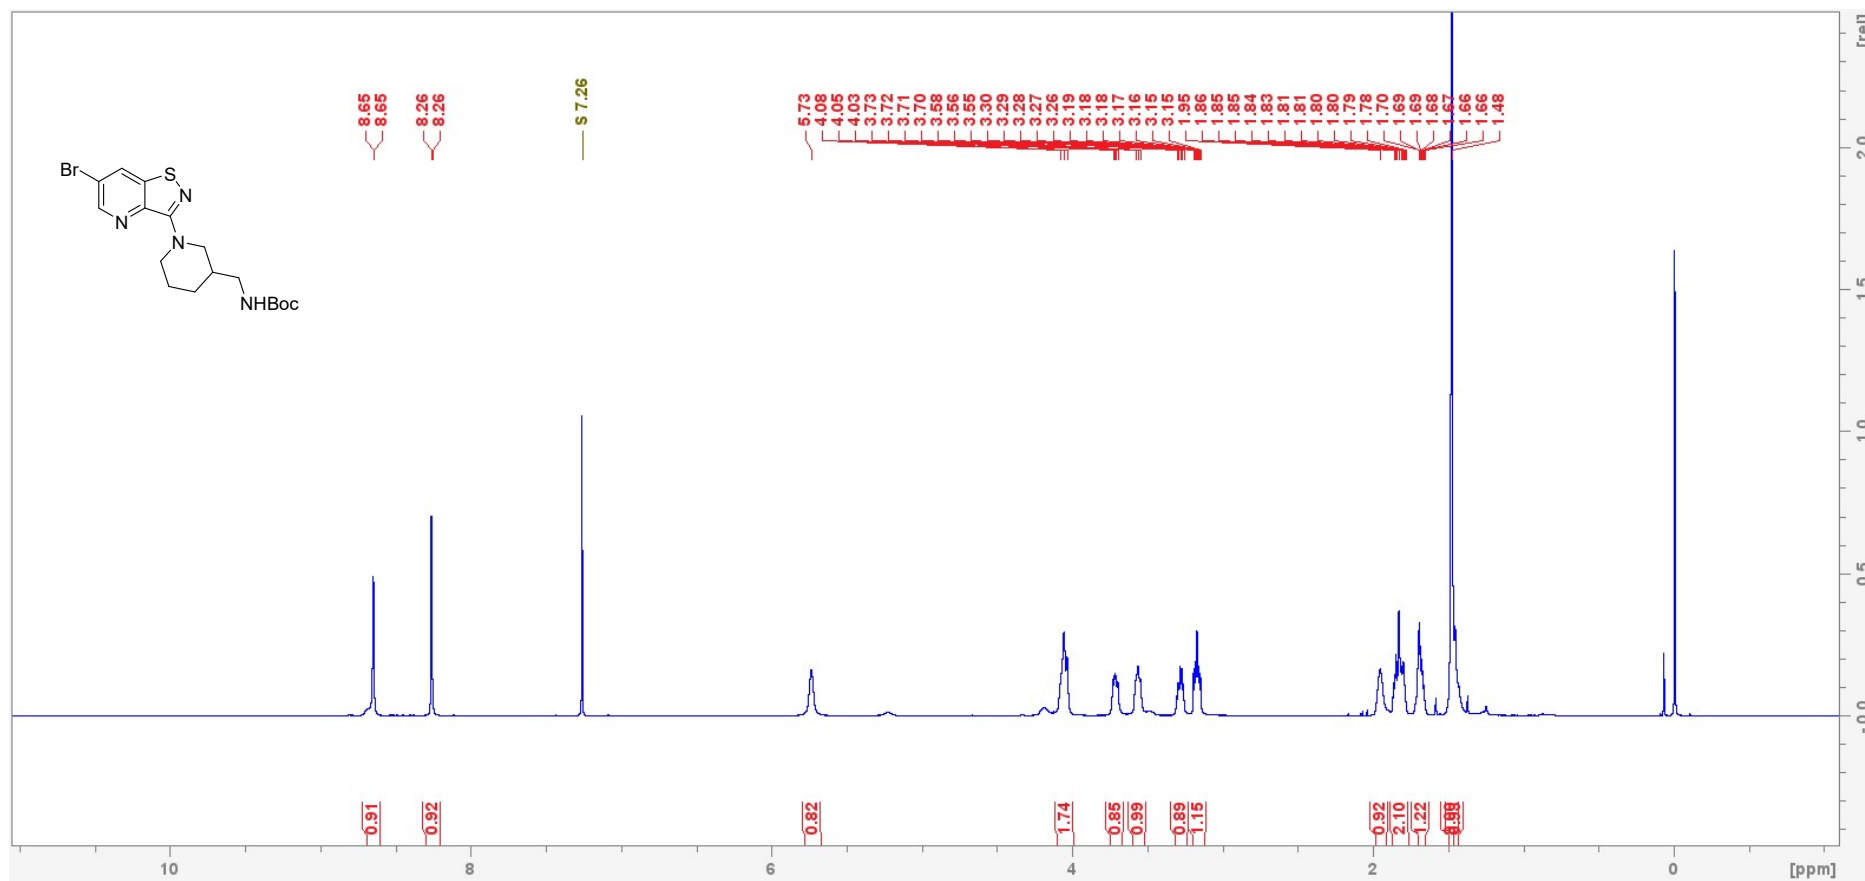

<sup>1</sup>H NMR spectrum (600 MHz, CDCl<sub>3</sub>) of 17ea

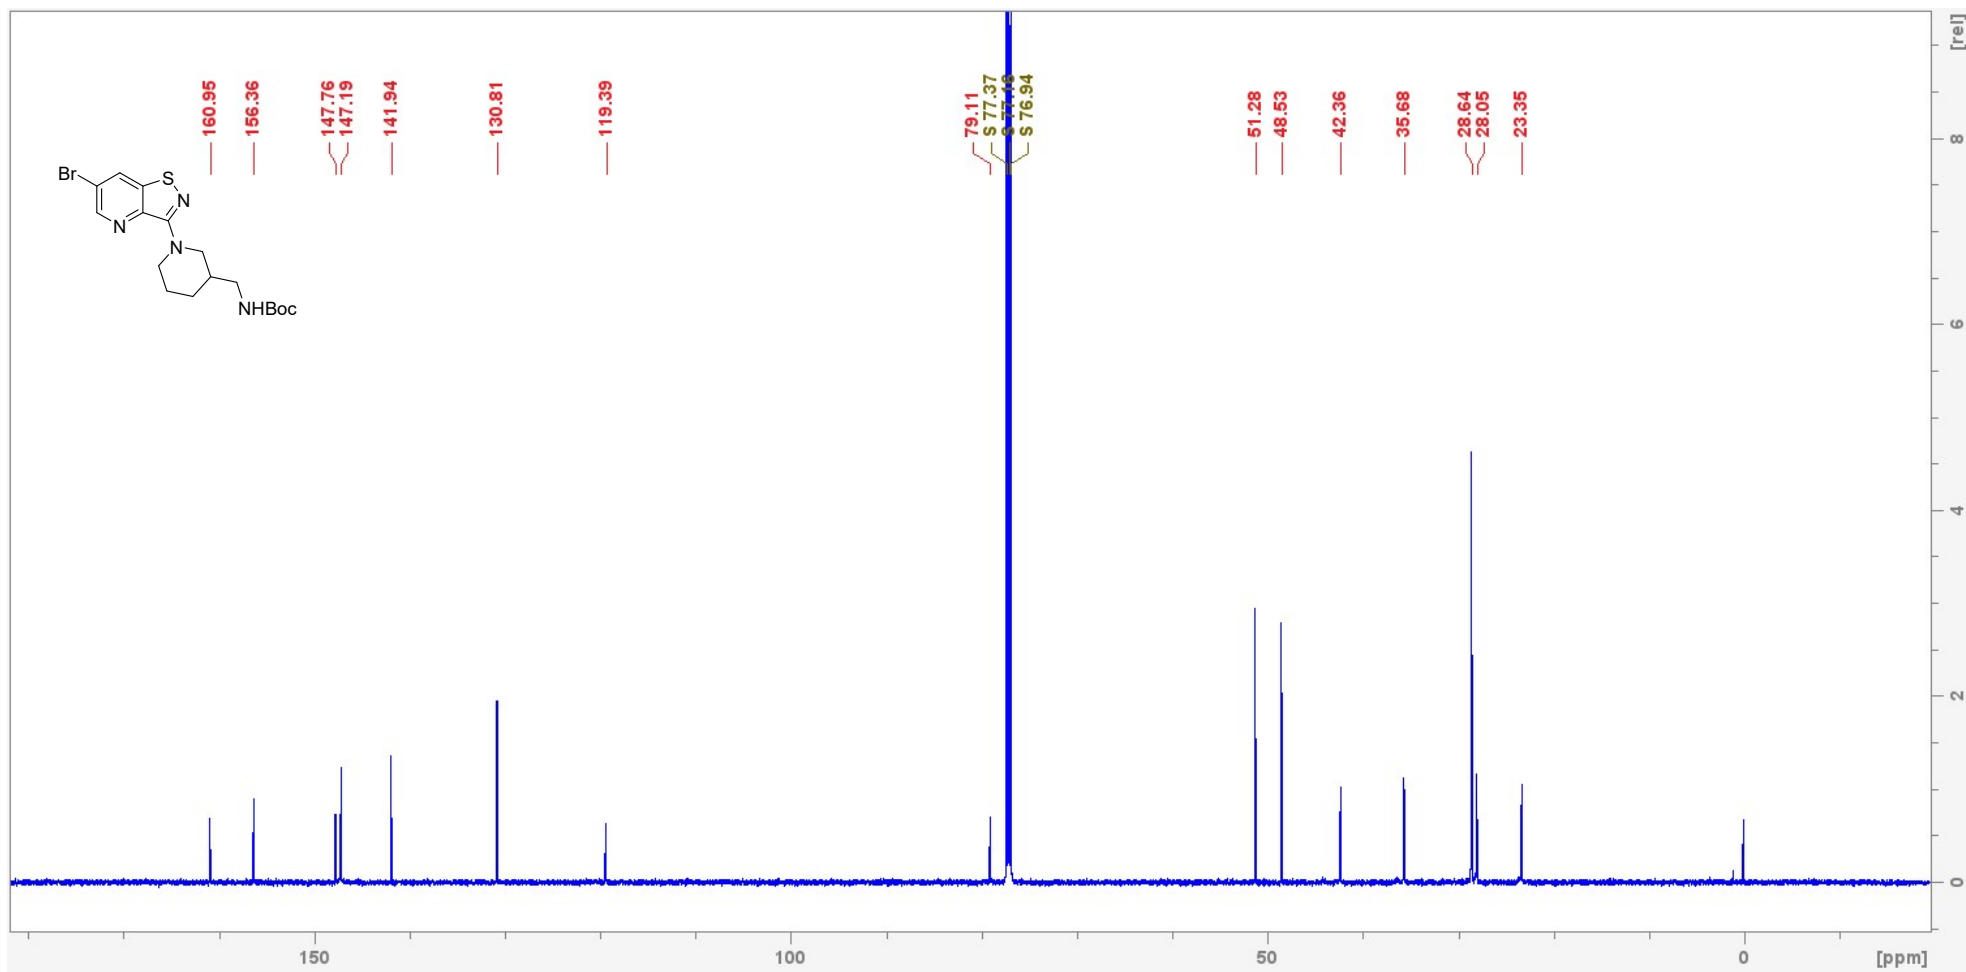

$^{13}\text{C}$  NMR spectrum (151 MHz,  $\text{CDCl}_3$ ) of **17ea**

**(1-(6-Bromoisothiazolo[4,5-*b*]pyridin-3-yl)piperidin-3-yl)methanaminium chloride (17eb)**

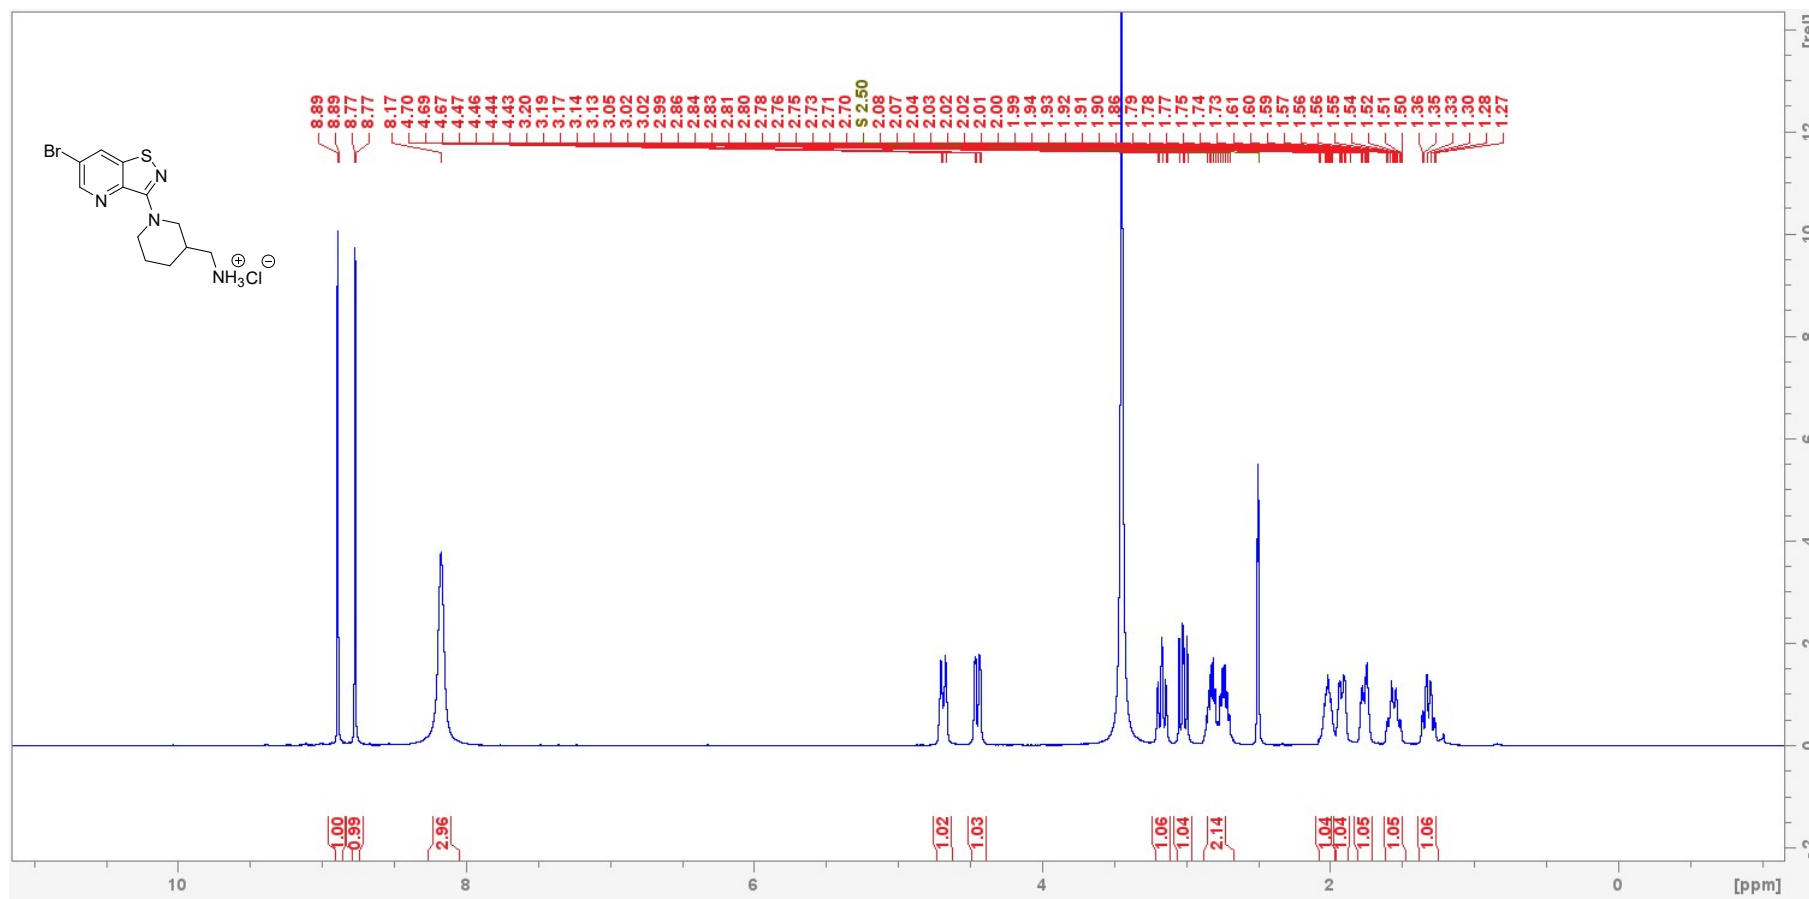

<sup>1</sup>H NMR spectrum (400 MHz, DMSO-*d*<sub>6</sub>) of 17eb

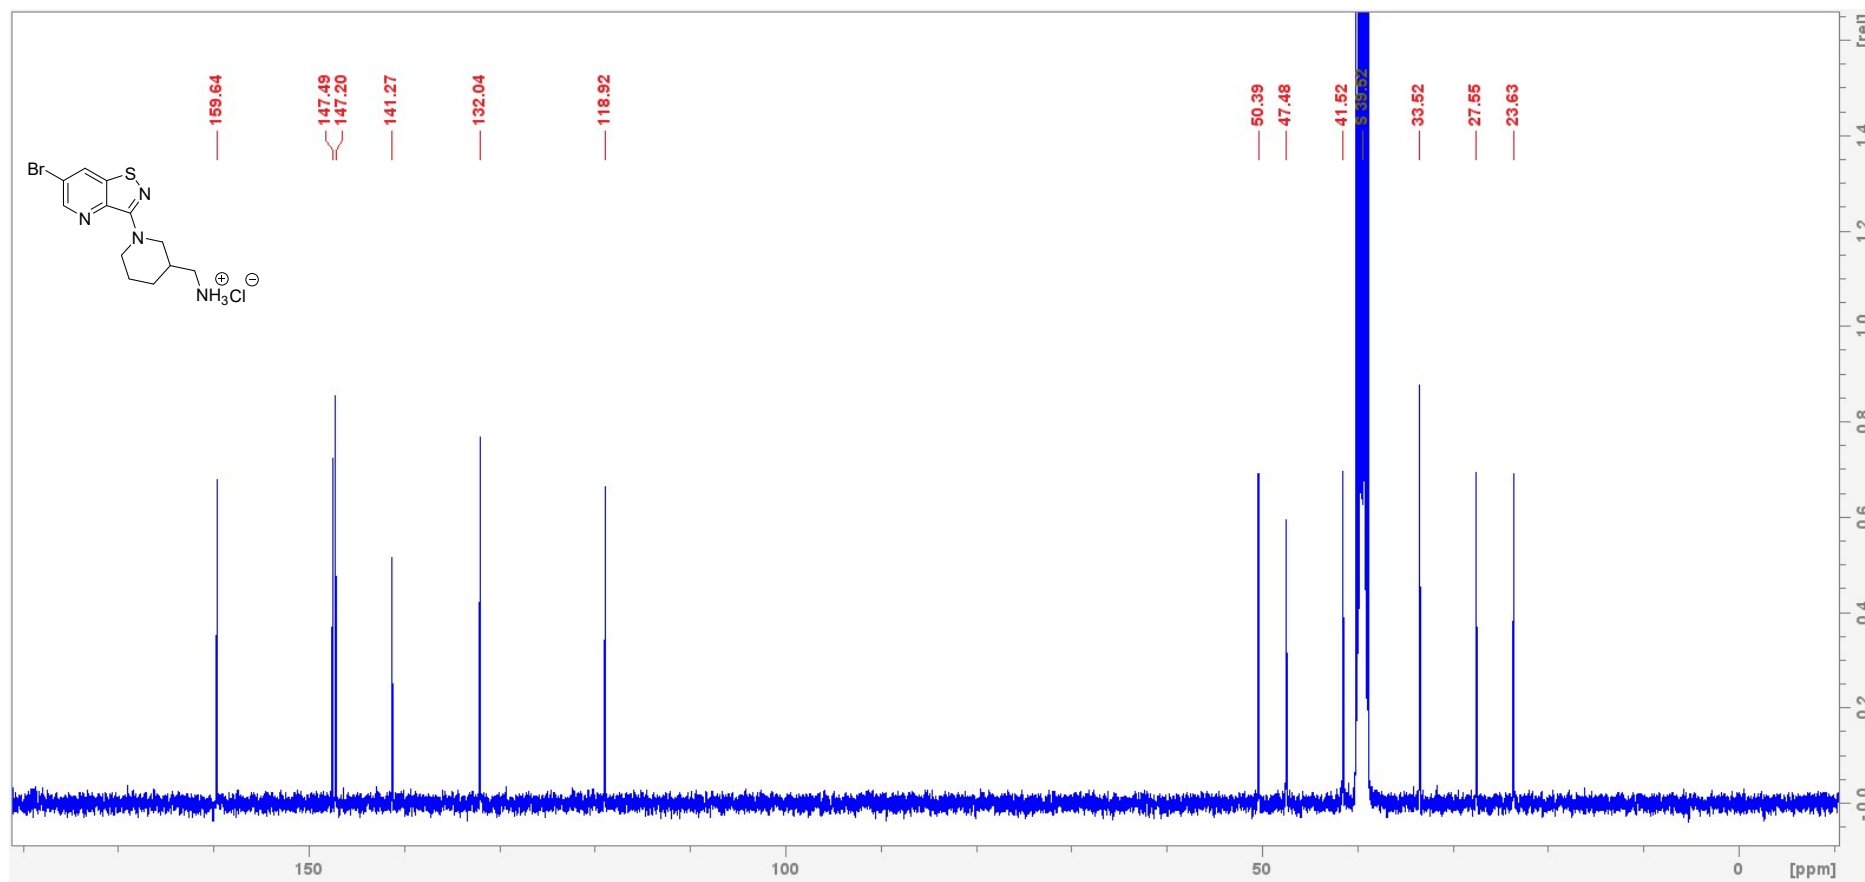

$^{13}\text{C}$  NMR spectrum (101 MHz,  $\text{DMSO-}d_6$ ) of **17eb**

**N-((1-(6-bromoisothiazolo[4,5-b]pyridin-3-yl)piperidin-3-yl)methyl) cyclopropanecarboxamide (17ec)**

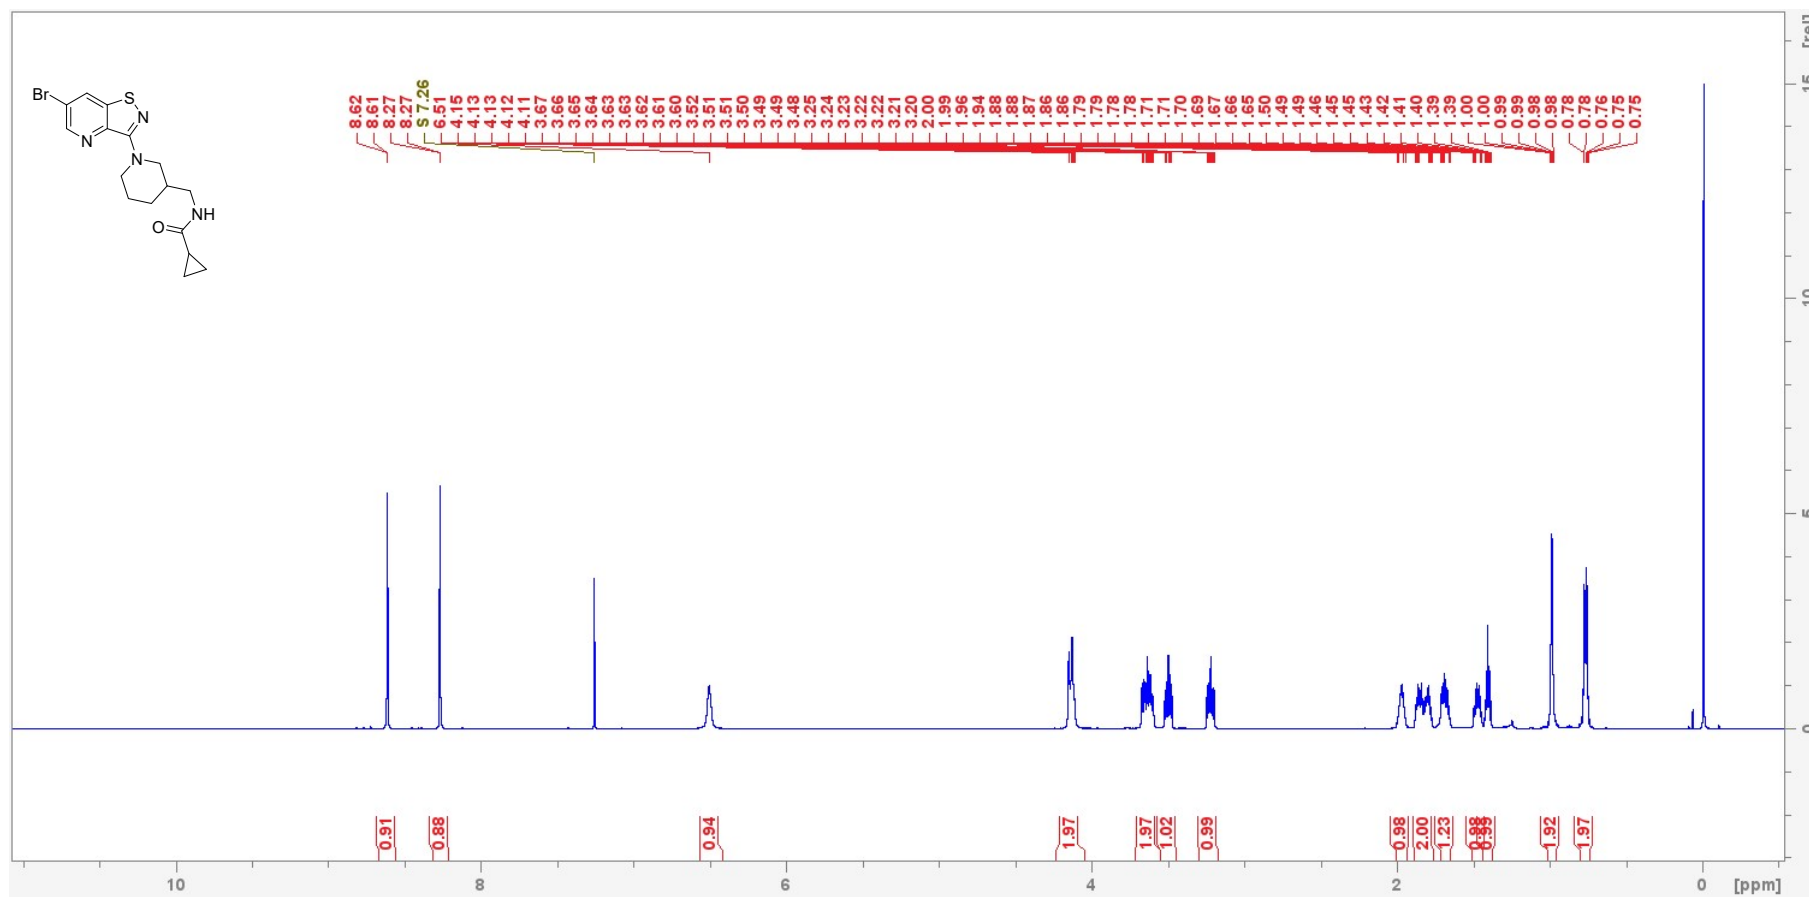

<sup>1</sup>H NMR spectrum (600 MHz, CDCl<sub>3</sub>) of 17ec

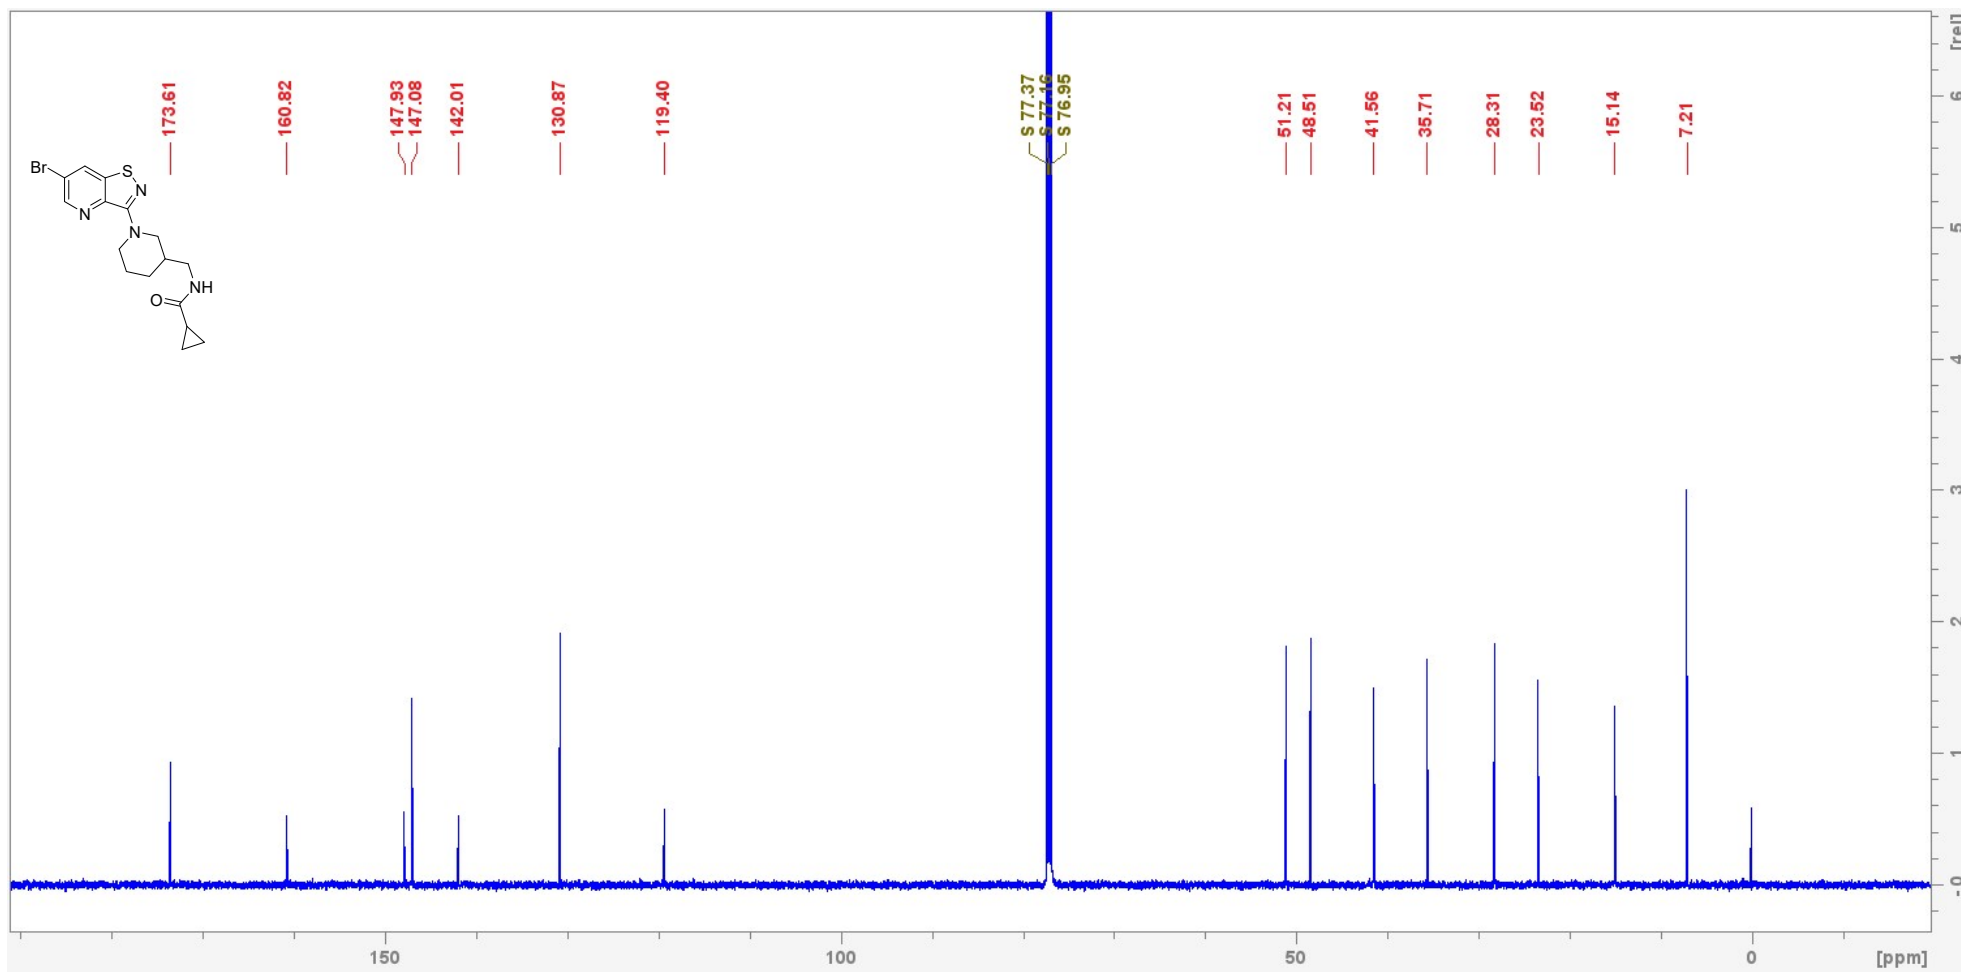

$^{13}\text{C}$  NMR spectrum (151 MHz,  $\text{CDCl}_3$ ) of 17ec

6-Bromo-3-isopropoxyisothiazolo[4,5-*b*]pyridine (17f)

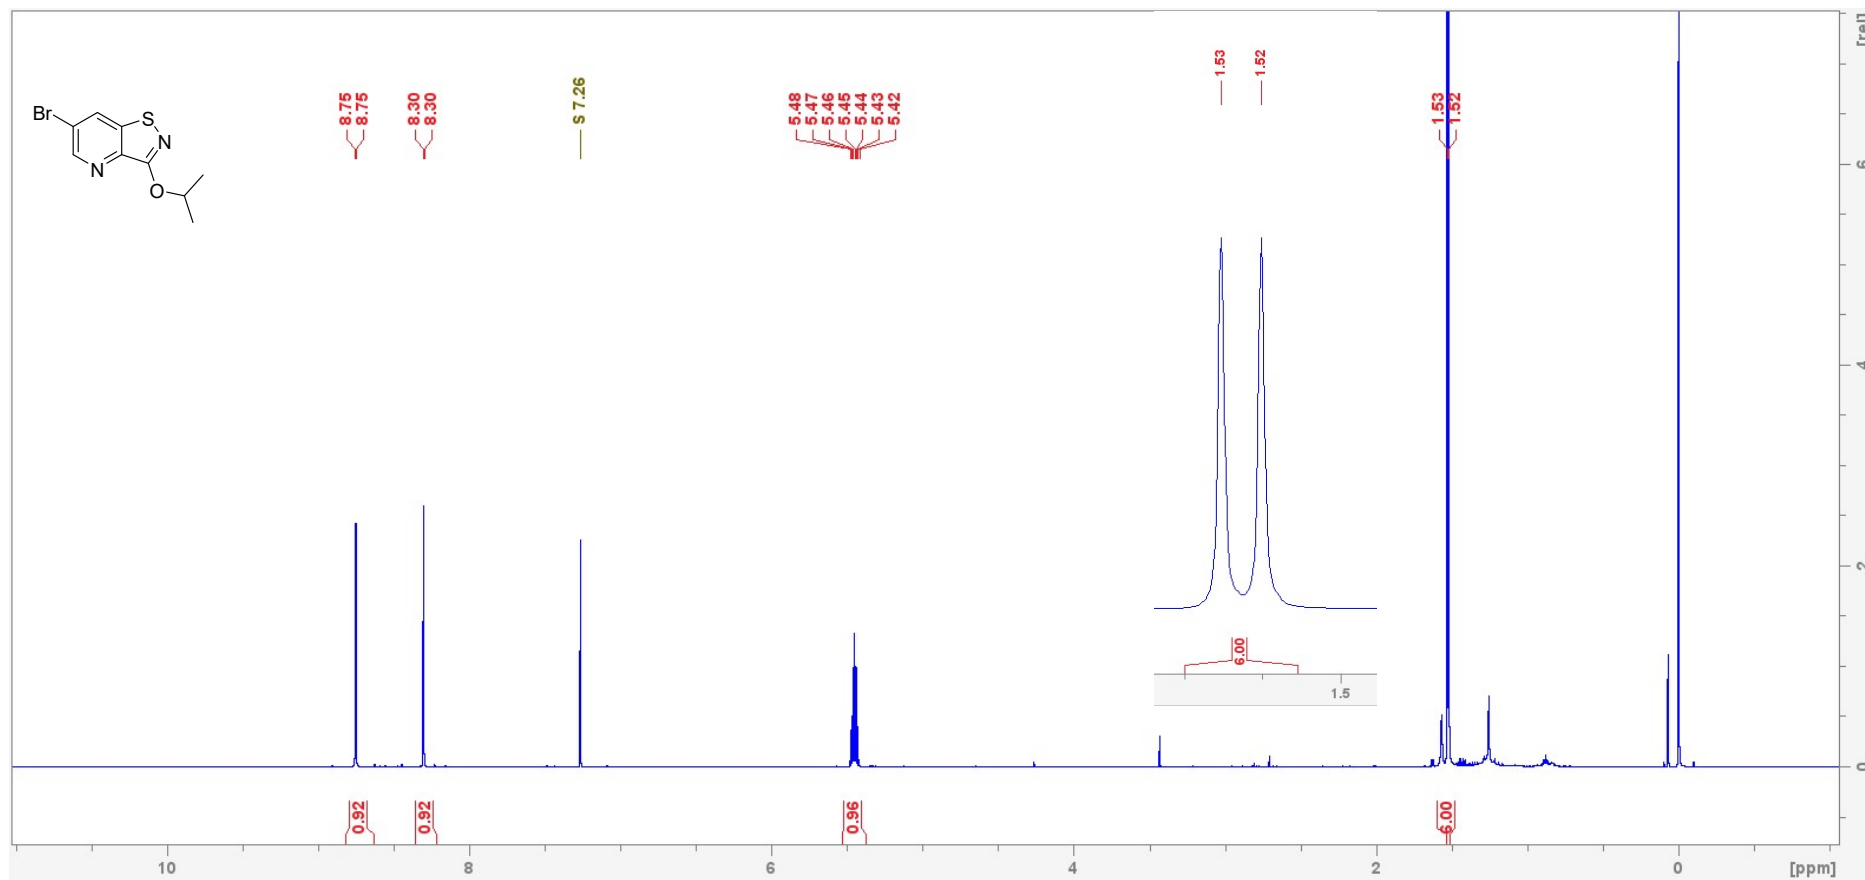

<sup>1</sup>H NMR spectrum (600 MHz, CDCl<sub>3</sub>) of 17f

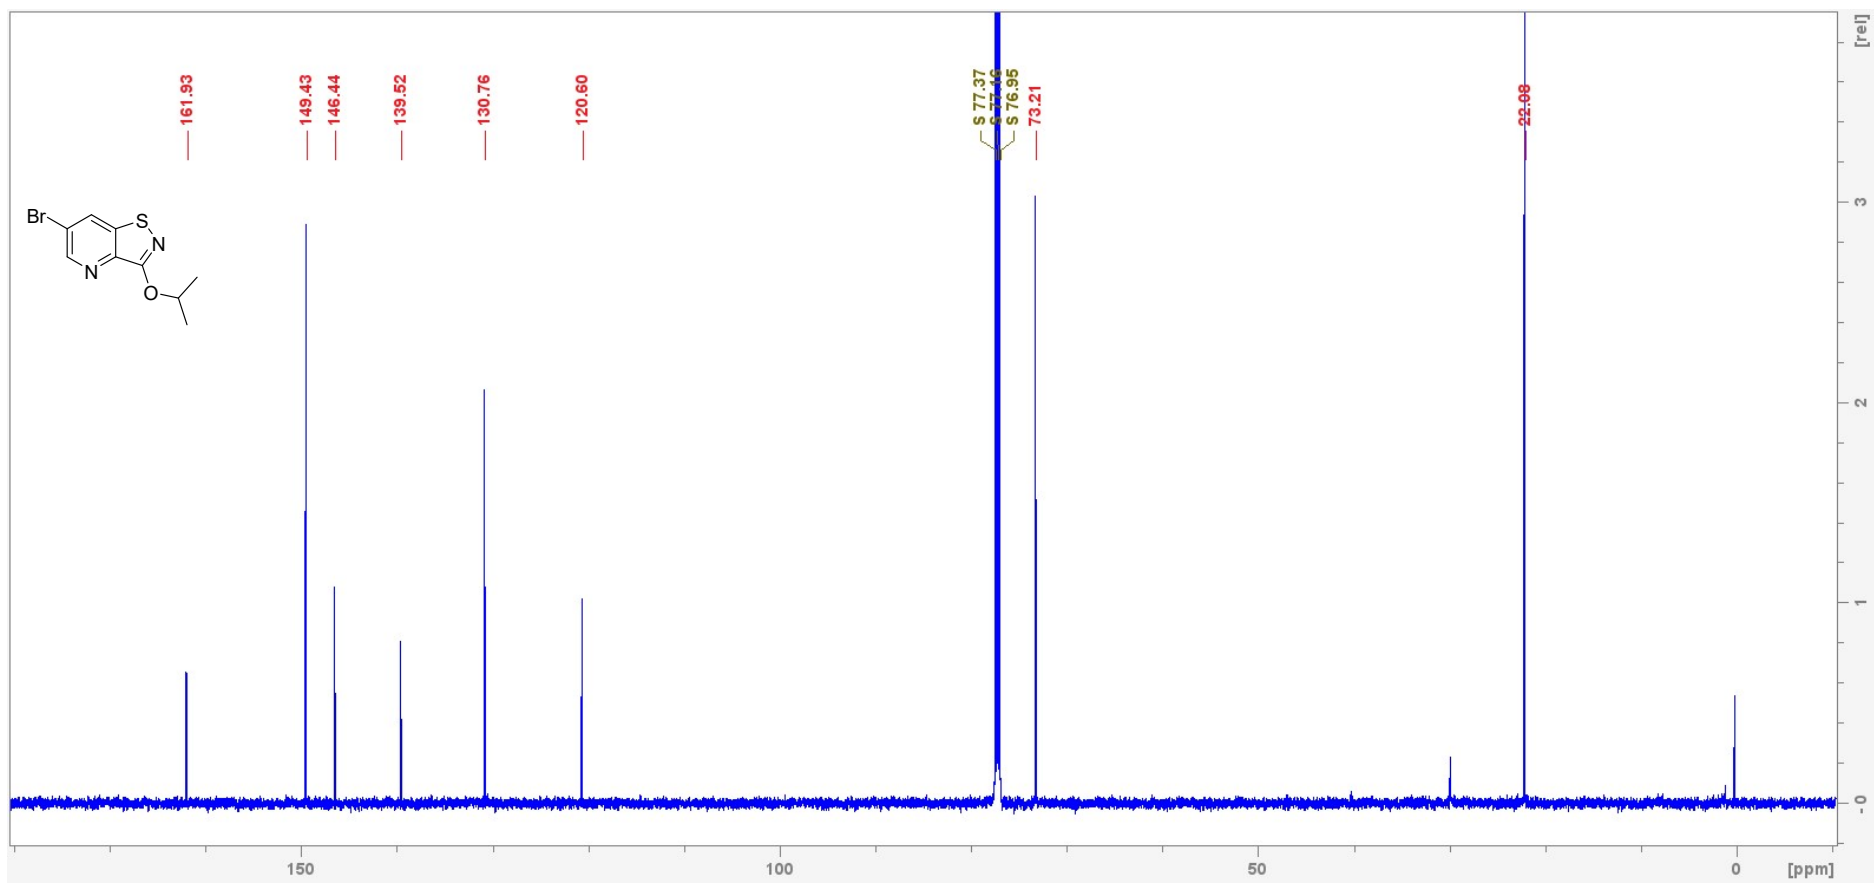

<sup>13</sup>C NMR spectrum (151 MHz, CDCl<sub>3</sub>) of **17f**



6-Bromo-3-(phenylthio)isothiazolo[4,5-b]pyridine (17g)

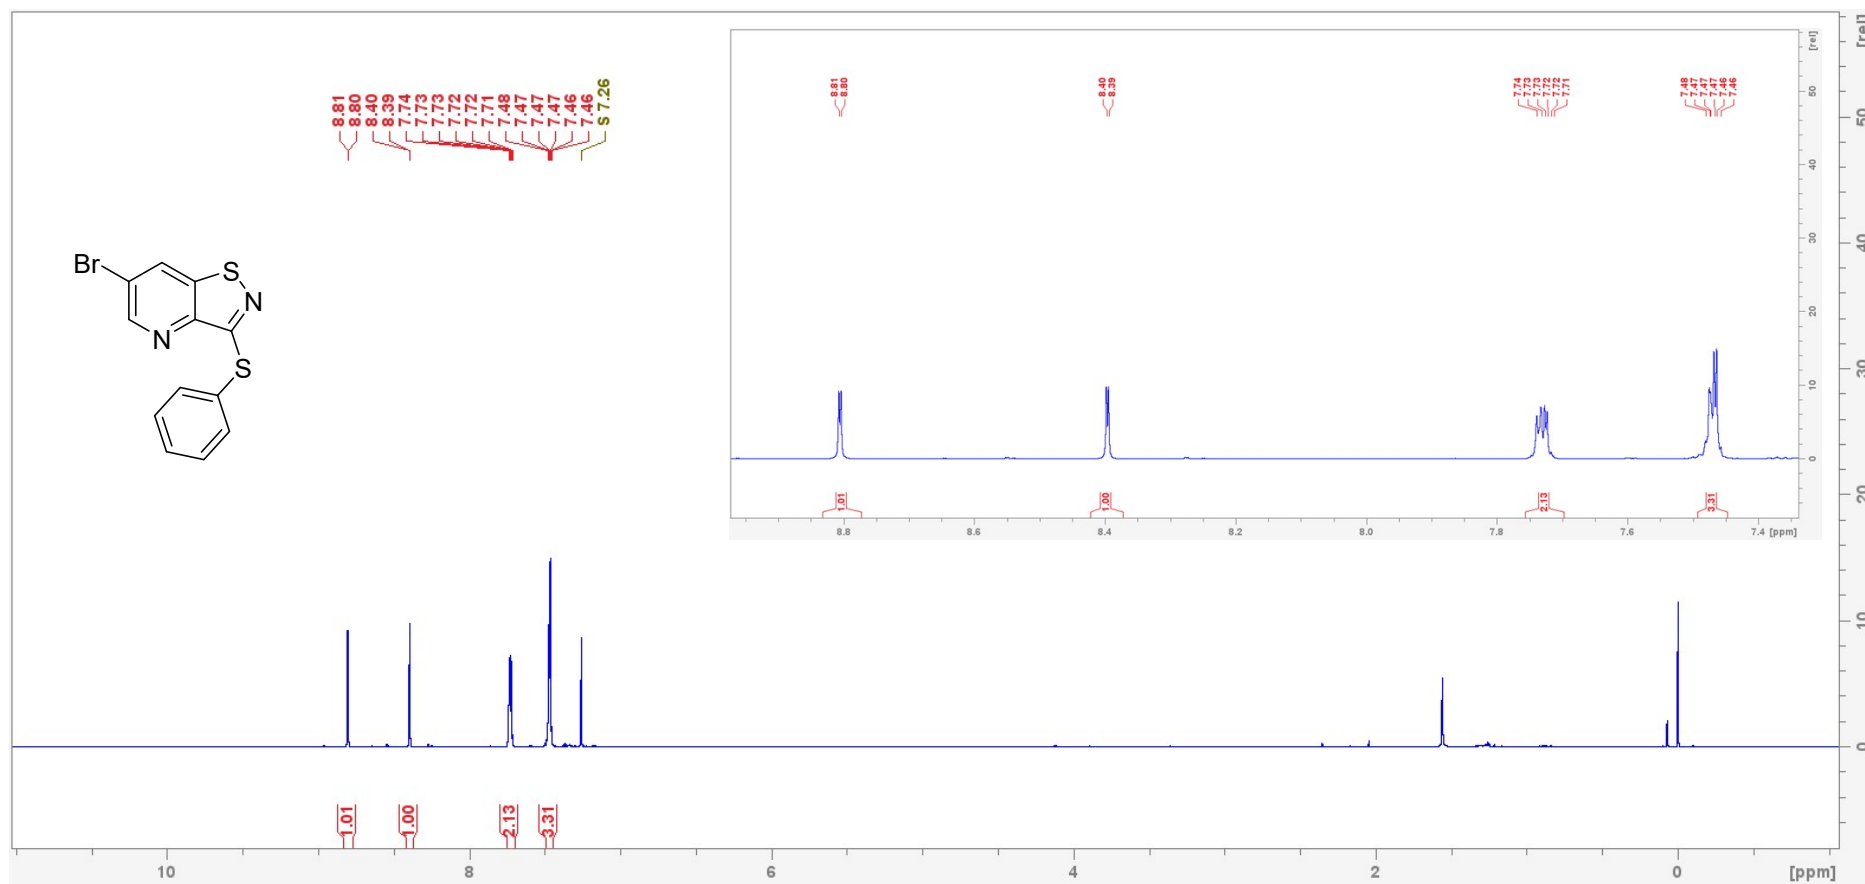

<sup>1</sup>H NMR spectrum (600 MHz, CDCl<sub>3</sub>) of 17g

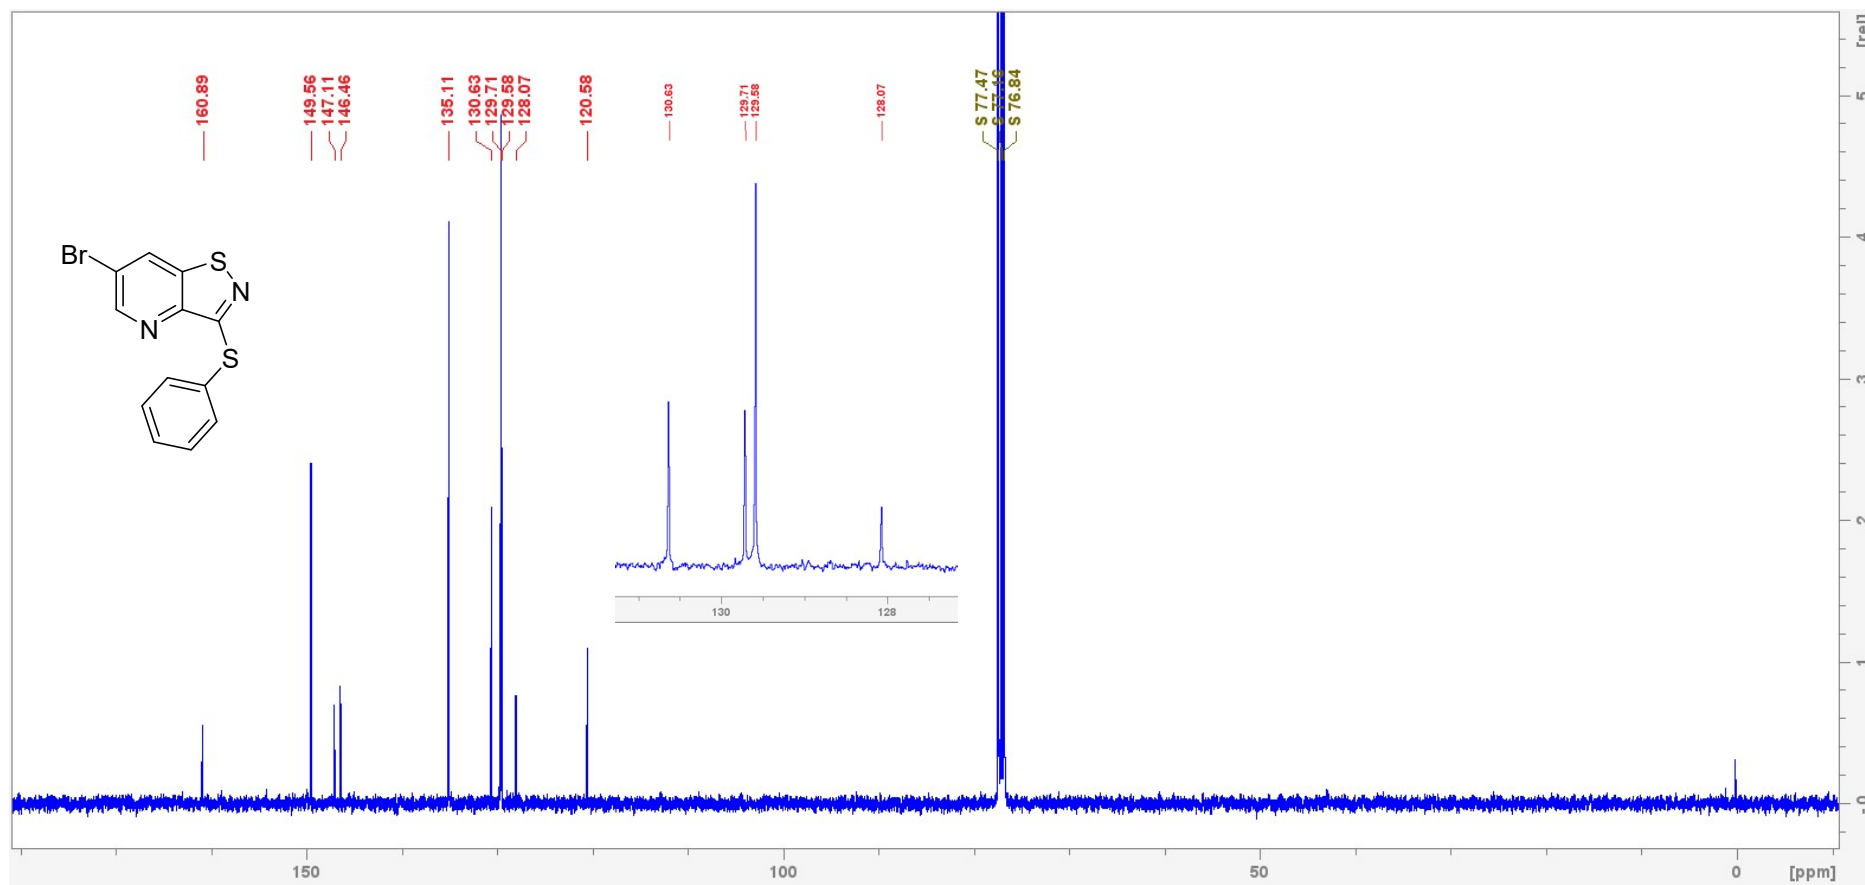

<sup>13</sup>C NMR spectrum (101 MHz, CDCl<sub>3</sub>) of 17g

**6-Bromo-3-(4-(methoxymethyl)-1H-1,2,3-triazol-1-yl)isothiazolo[4,5-b]pyridine (17h)**

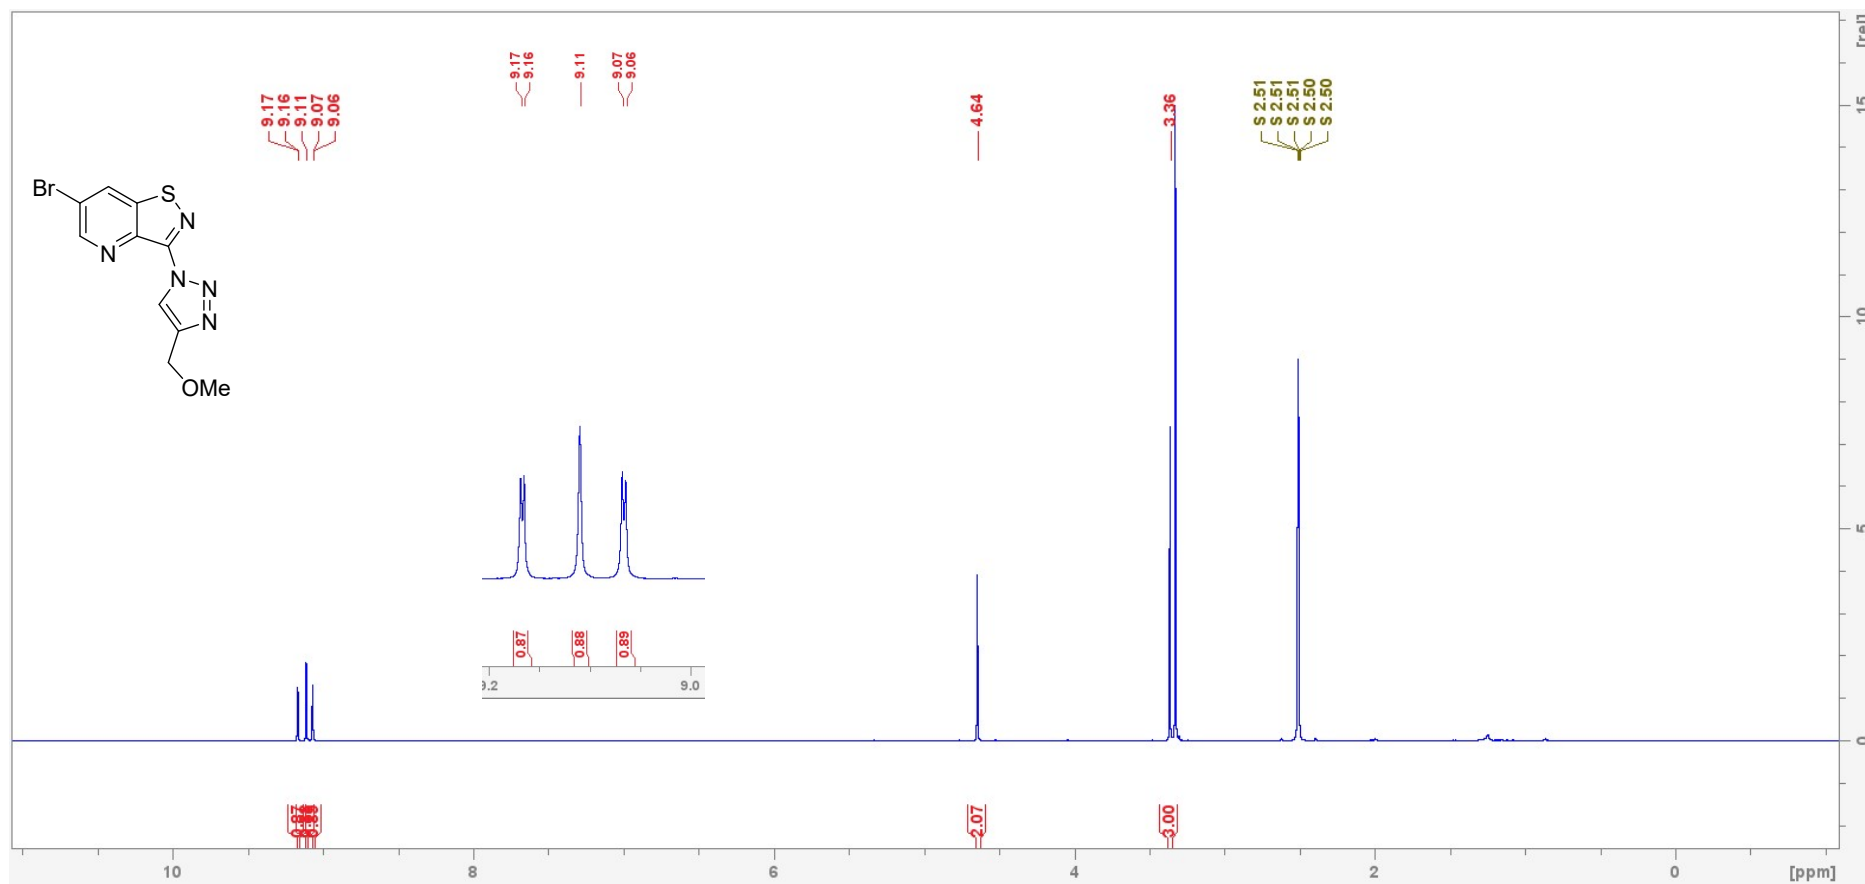

<sup>1</sup>H NMR spectrum (600 MHz, DMSO-*d*<sub>6</sub>) of **17h**

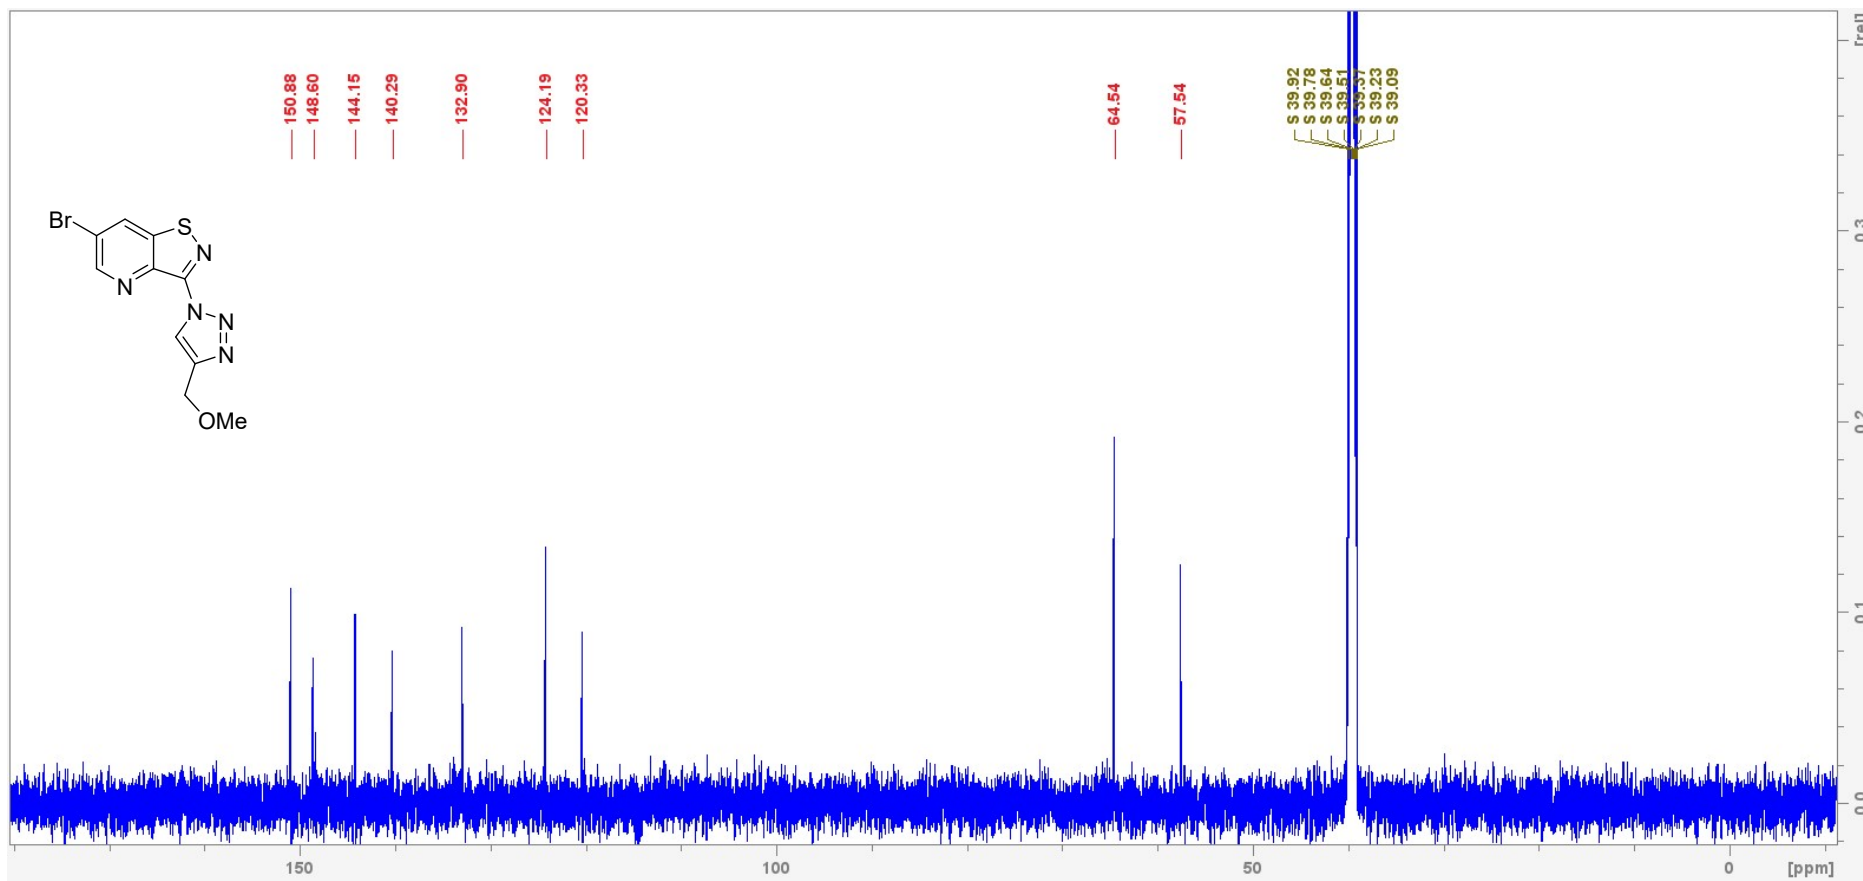

<sup>13</sup>C NMR spectrum (151 MHz, DMSO-*d*<sub>6</sub>) of **17h** (low concentration due to reduced solubility of **17h**)

6-Bromo-3-(pyridin-3-ylethynyl)isothiazolo[4,5-*b*]pyridine (17i)

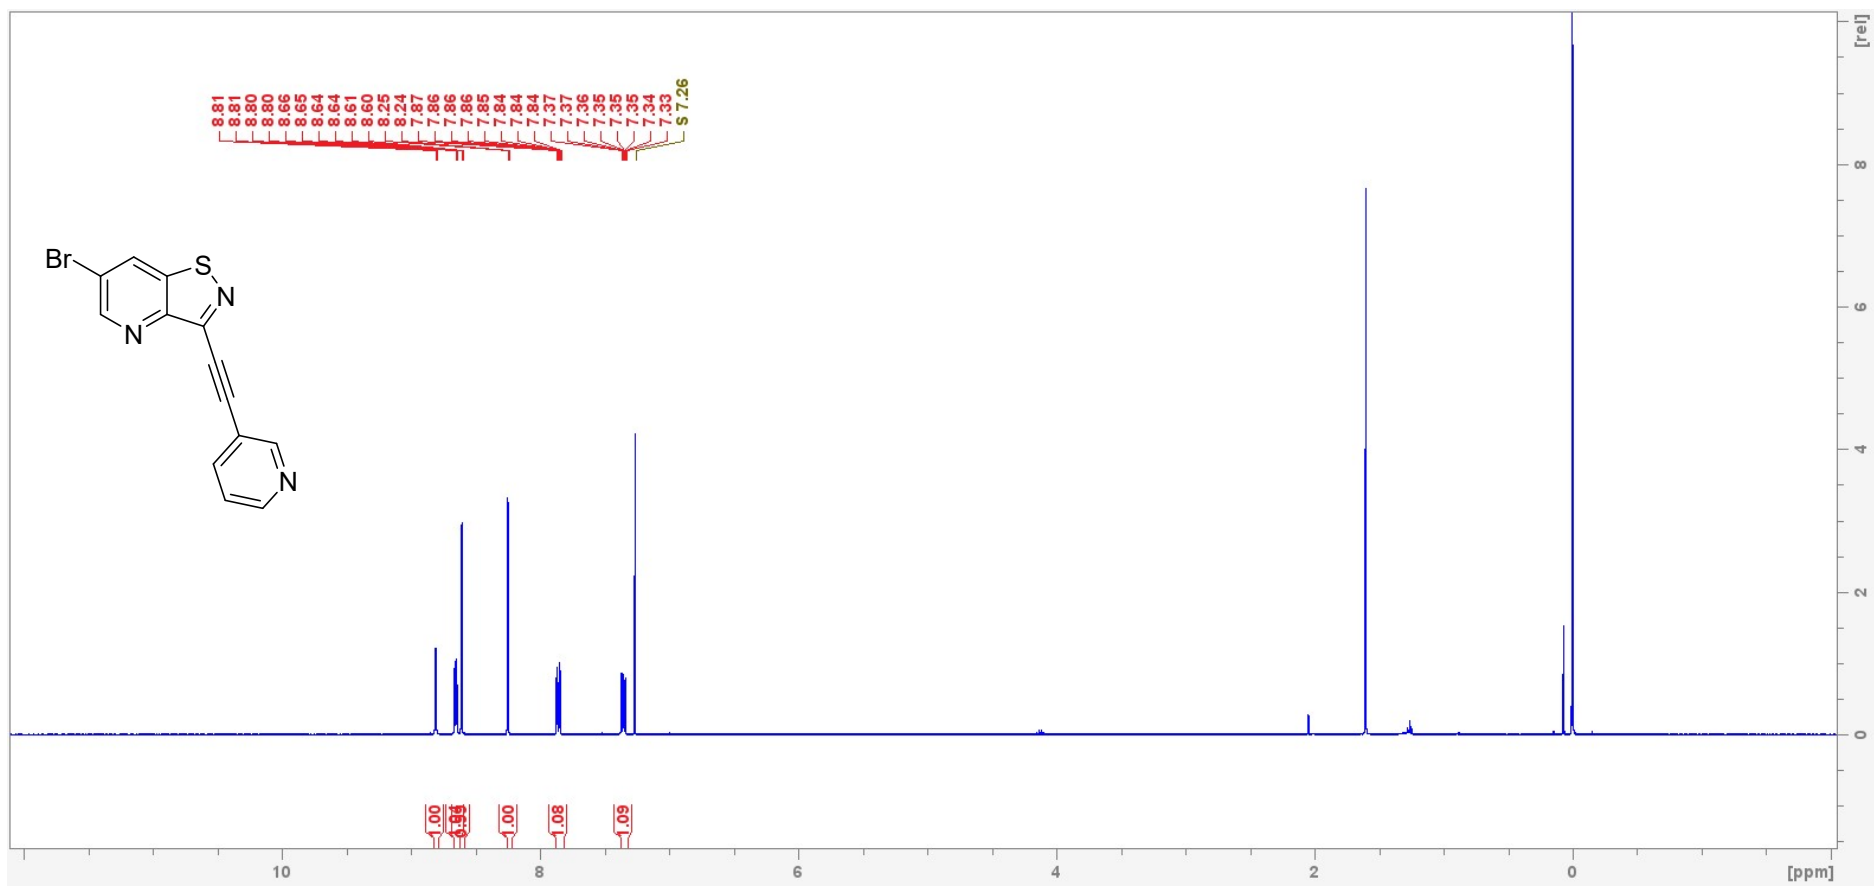

<sup>1</sup>H NMR spectrum (400 MHz, CDCl<sub>3</sub>) of 17i

Zoom-in on the aromatic area:

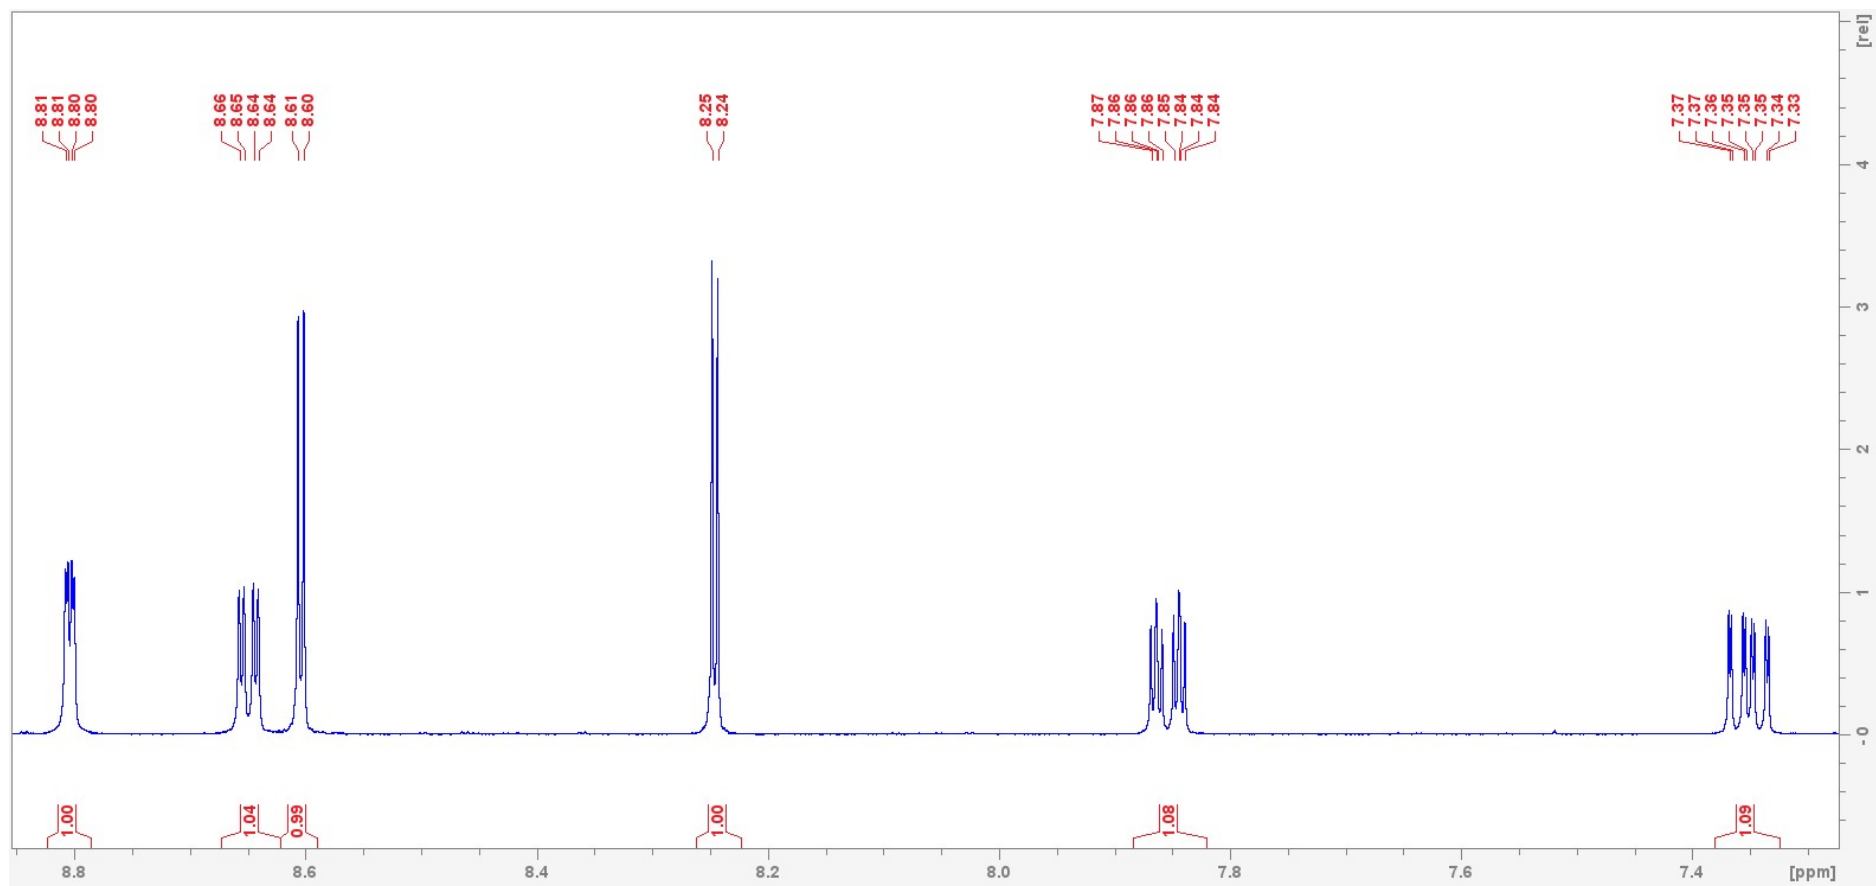

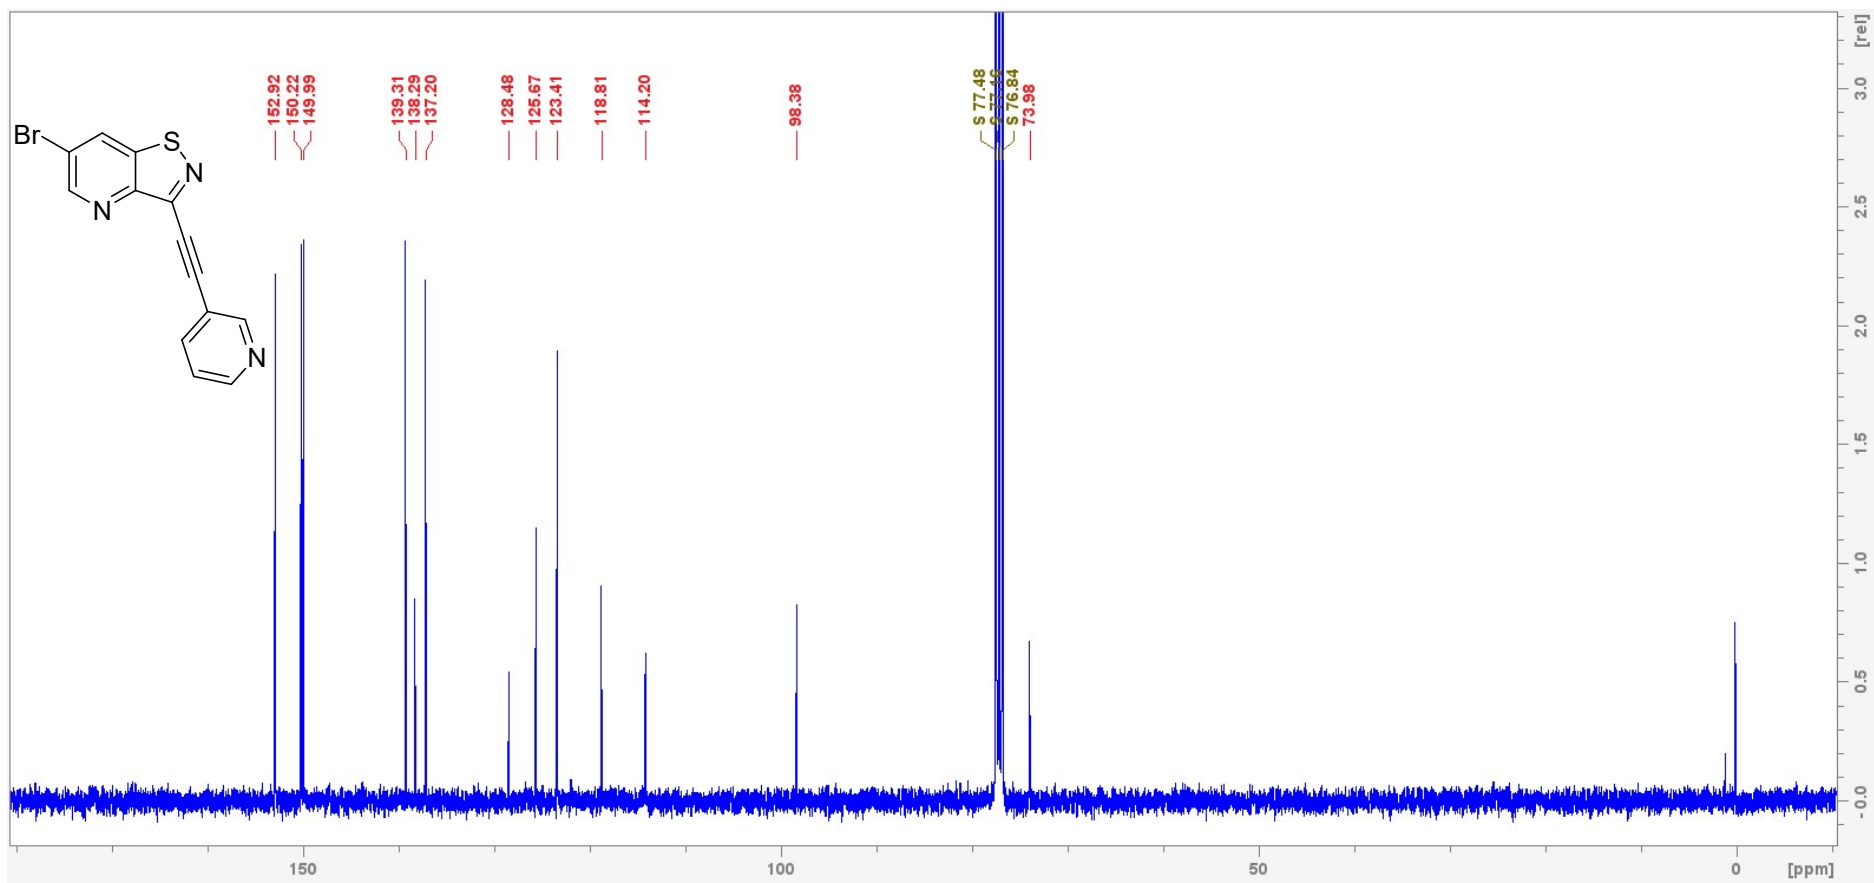

<sup>13</sup>C NMR spectrum (101 MHz, CDCl<sub>3</sub>) of **17i**

6-(3,4-Dimethoxyphenyl)isothiazolo[4,5-b]pyridin-3-amine (18a)

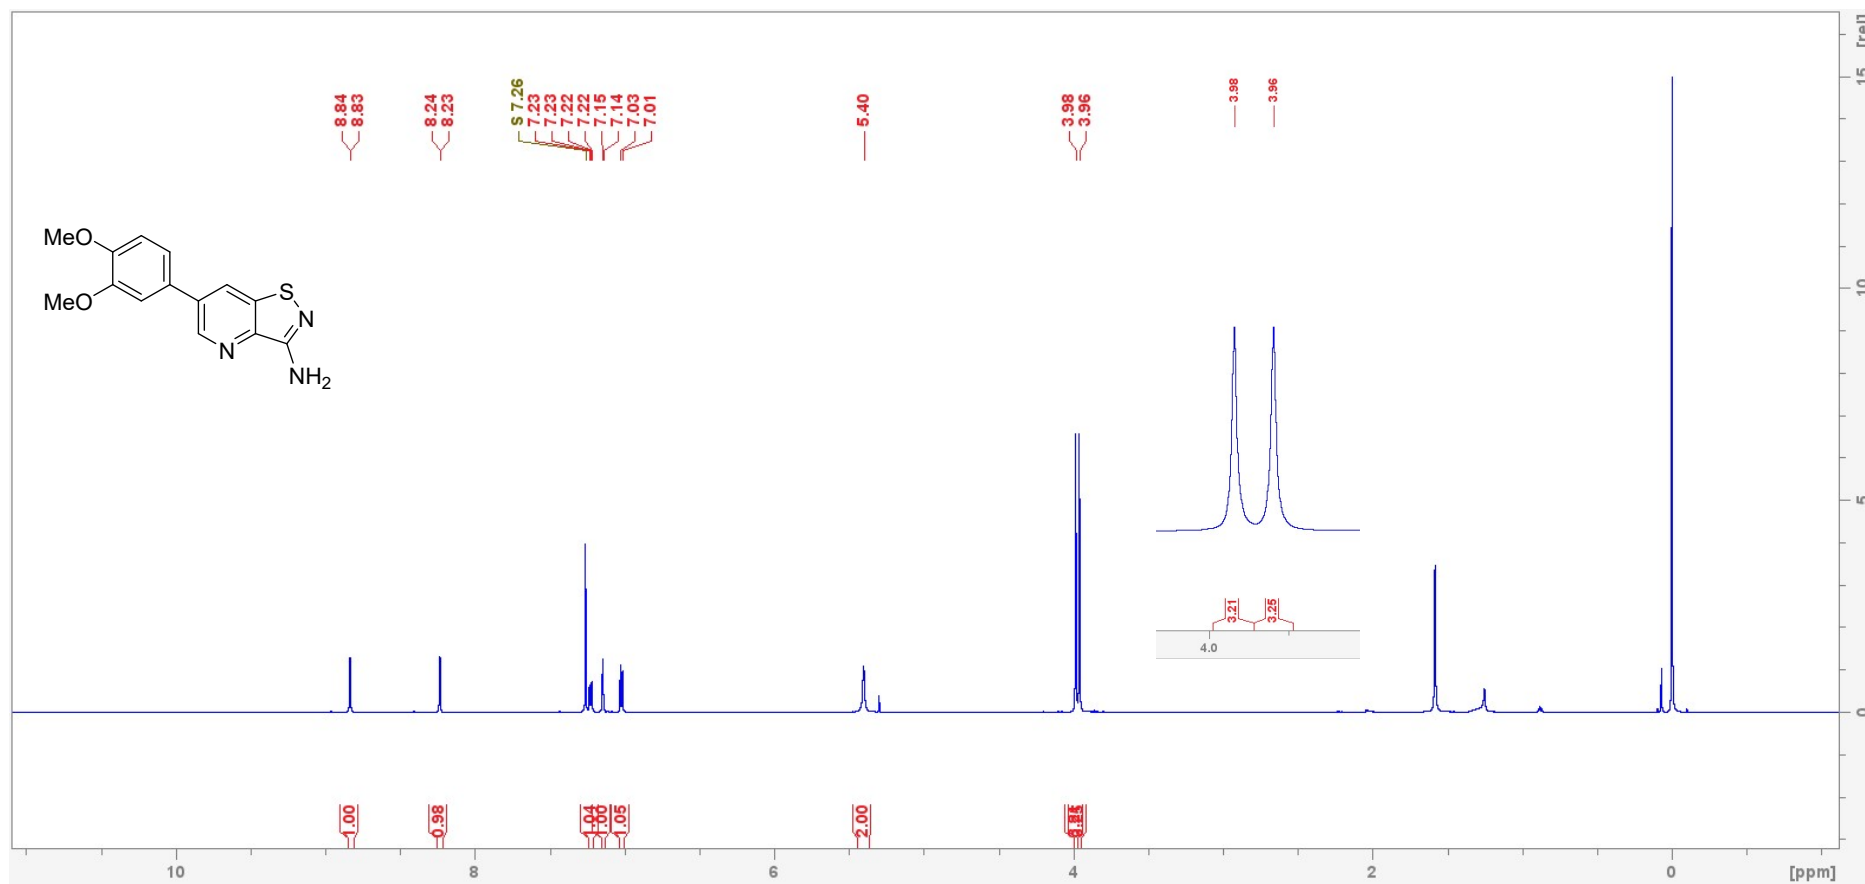

<sup>1</sup>H NMR spectrum (600 MHz, CDCl<sub>3</sub>) of 18a



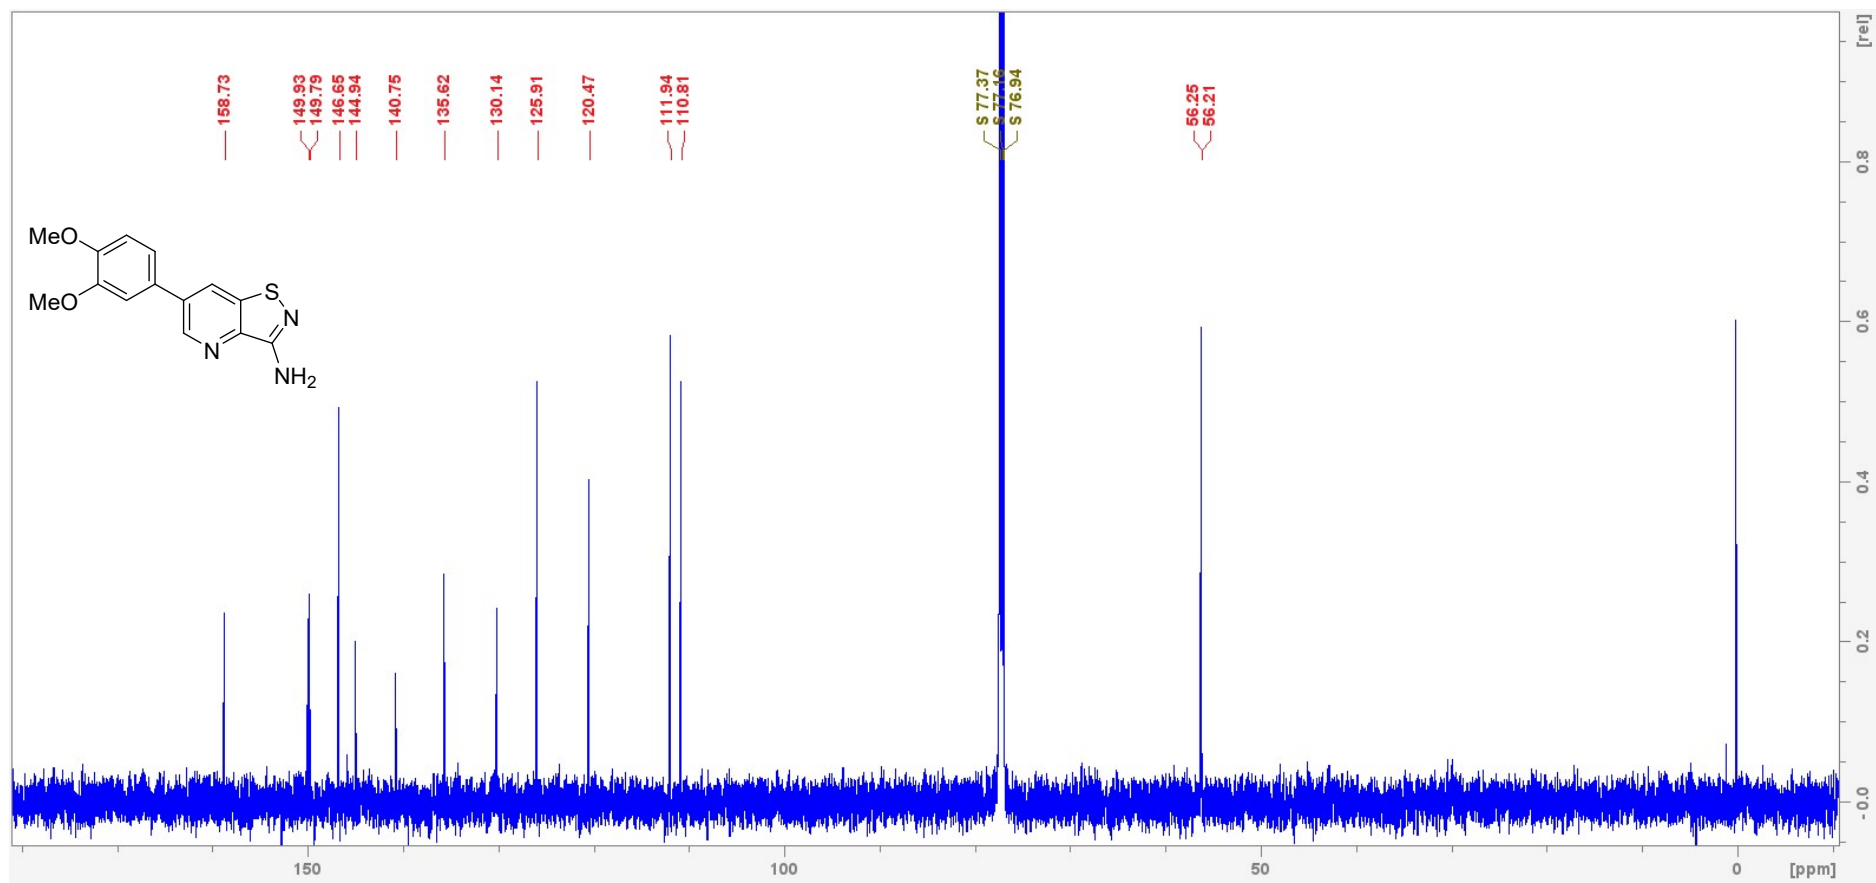

<sup>13</sup>C NMR spectrum (151 MHz, CDCl<sub>3</sub>) of **18a**

6-(3,4-Dimethoxyphenyl)-*N*-(tetrahydro-2*H*-pyran-4-yl)isothiazolo[4,5-*b*]pyridin-3-amine (18b)

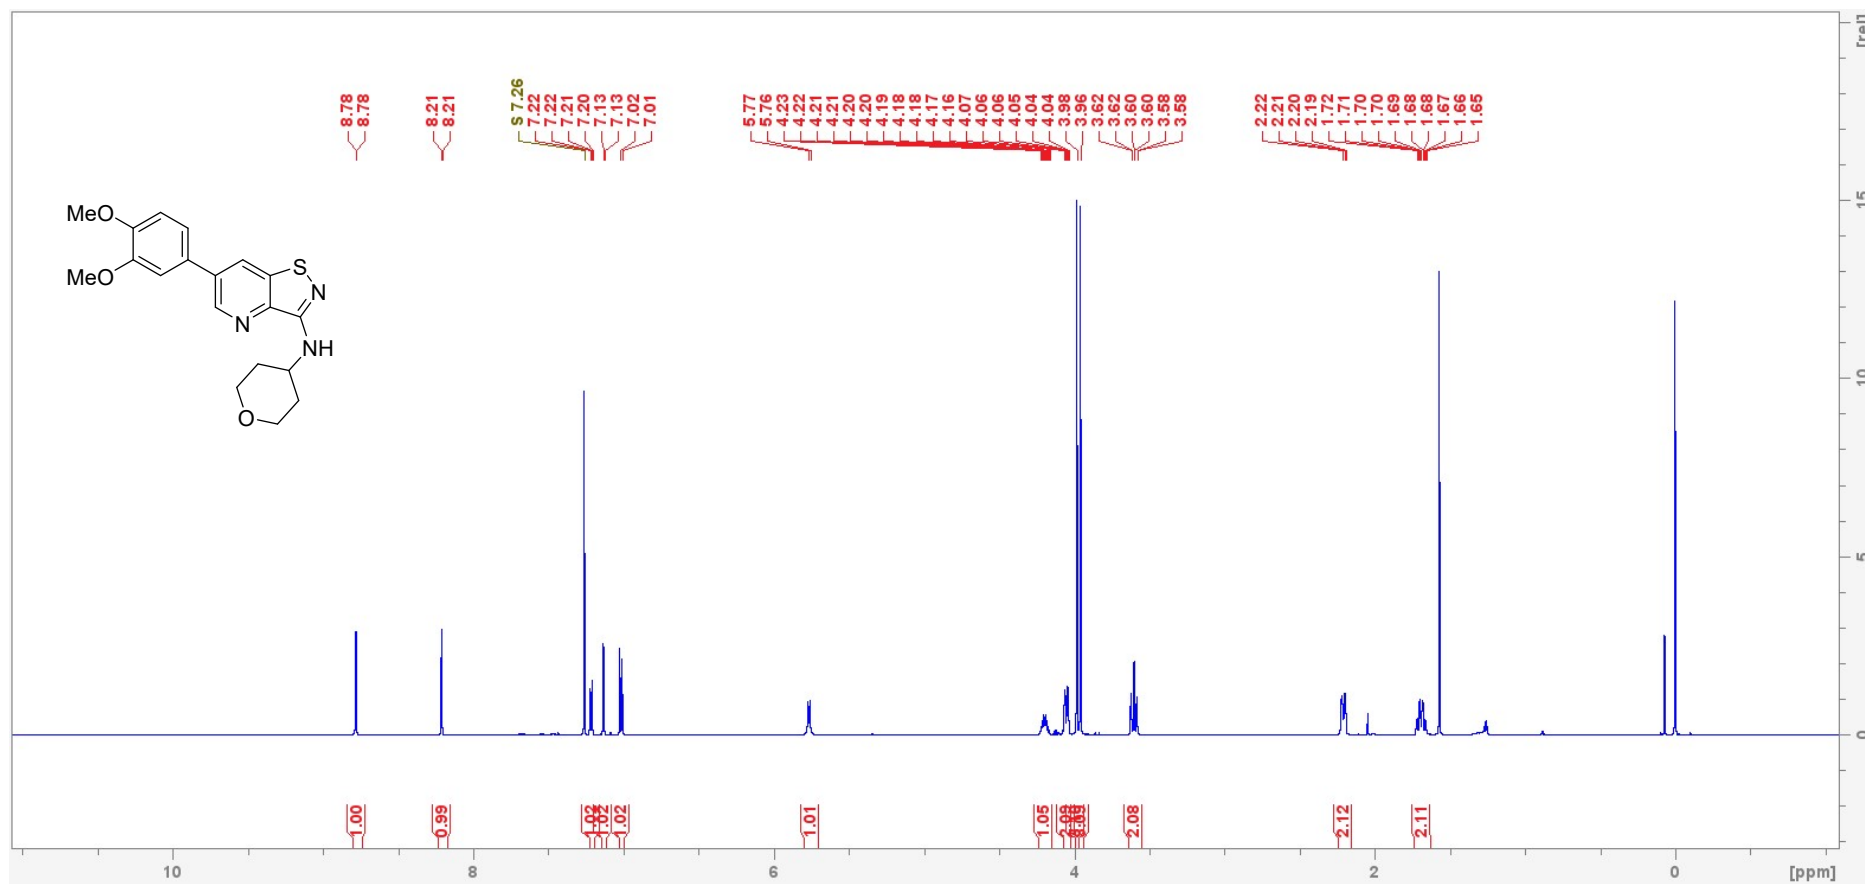

<sup>1</sup>H NMR spectrum (600 MHz, CDCl<sub>3</sub>) of 18b

Zoom-in on the aliphatic area:

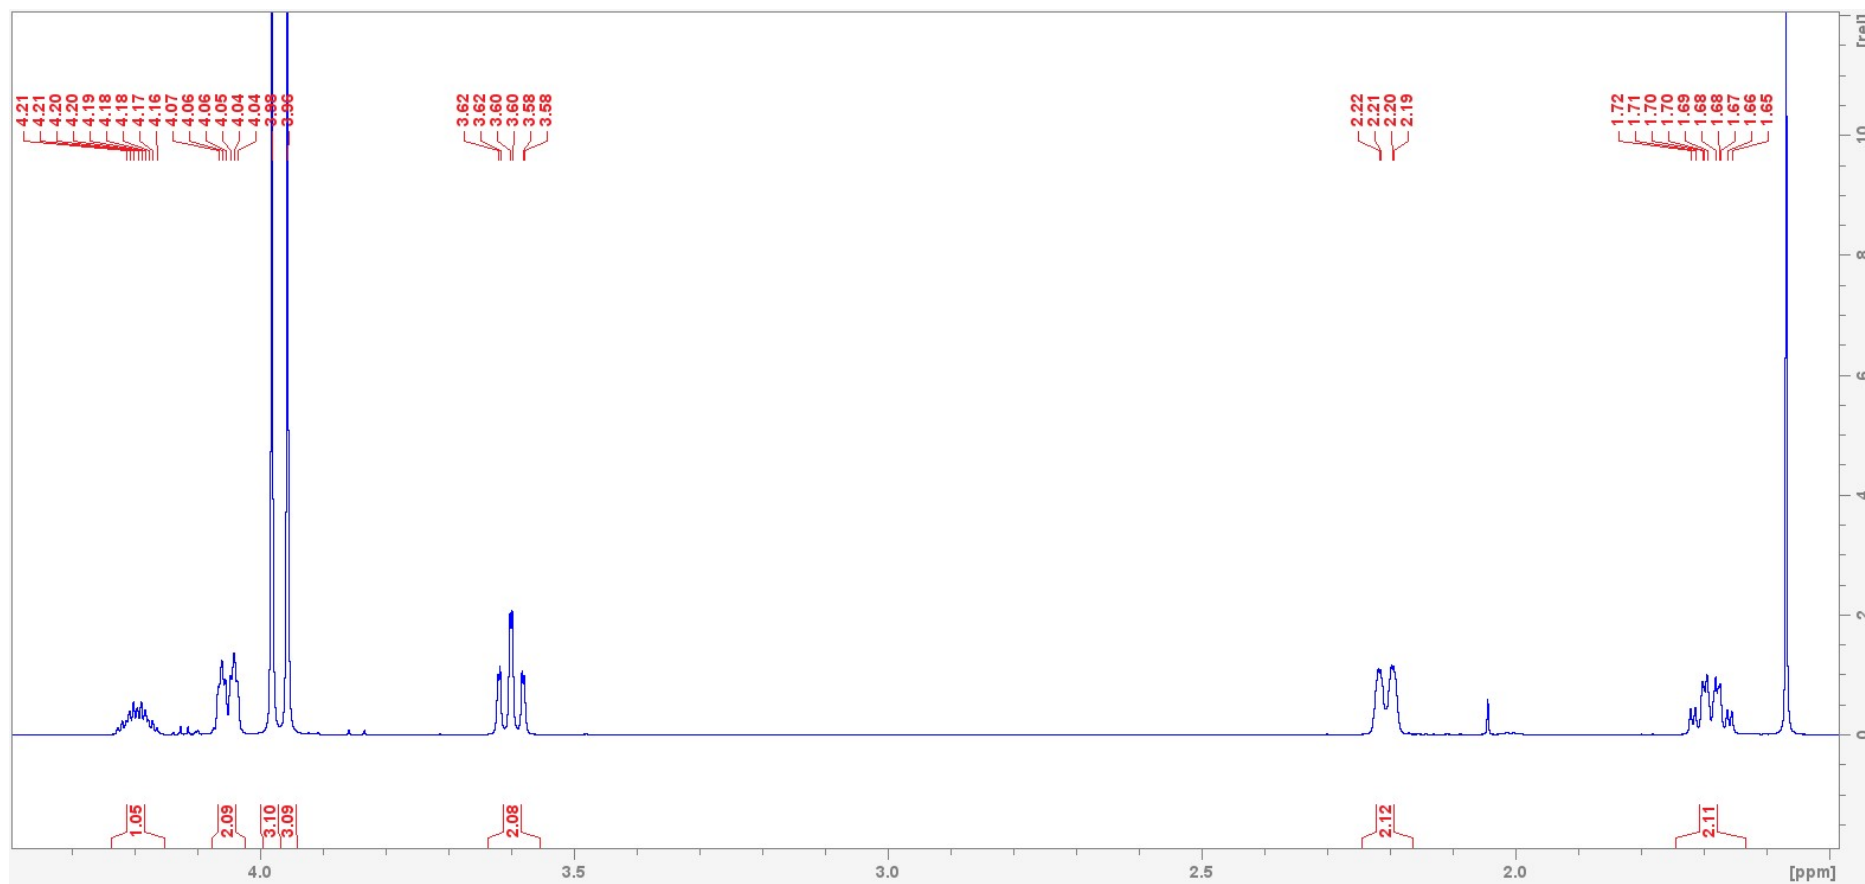

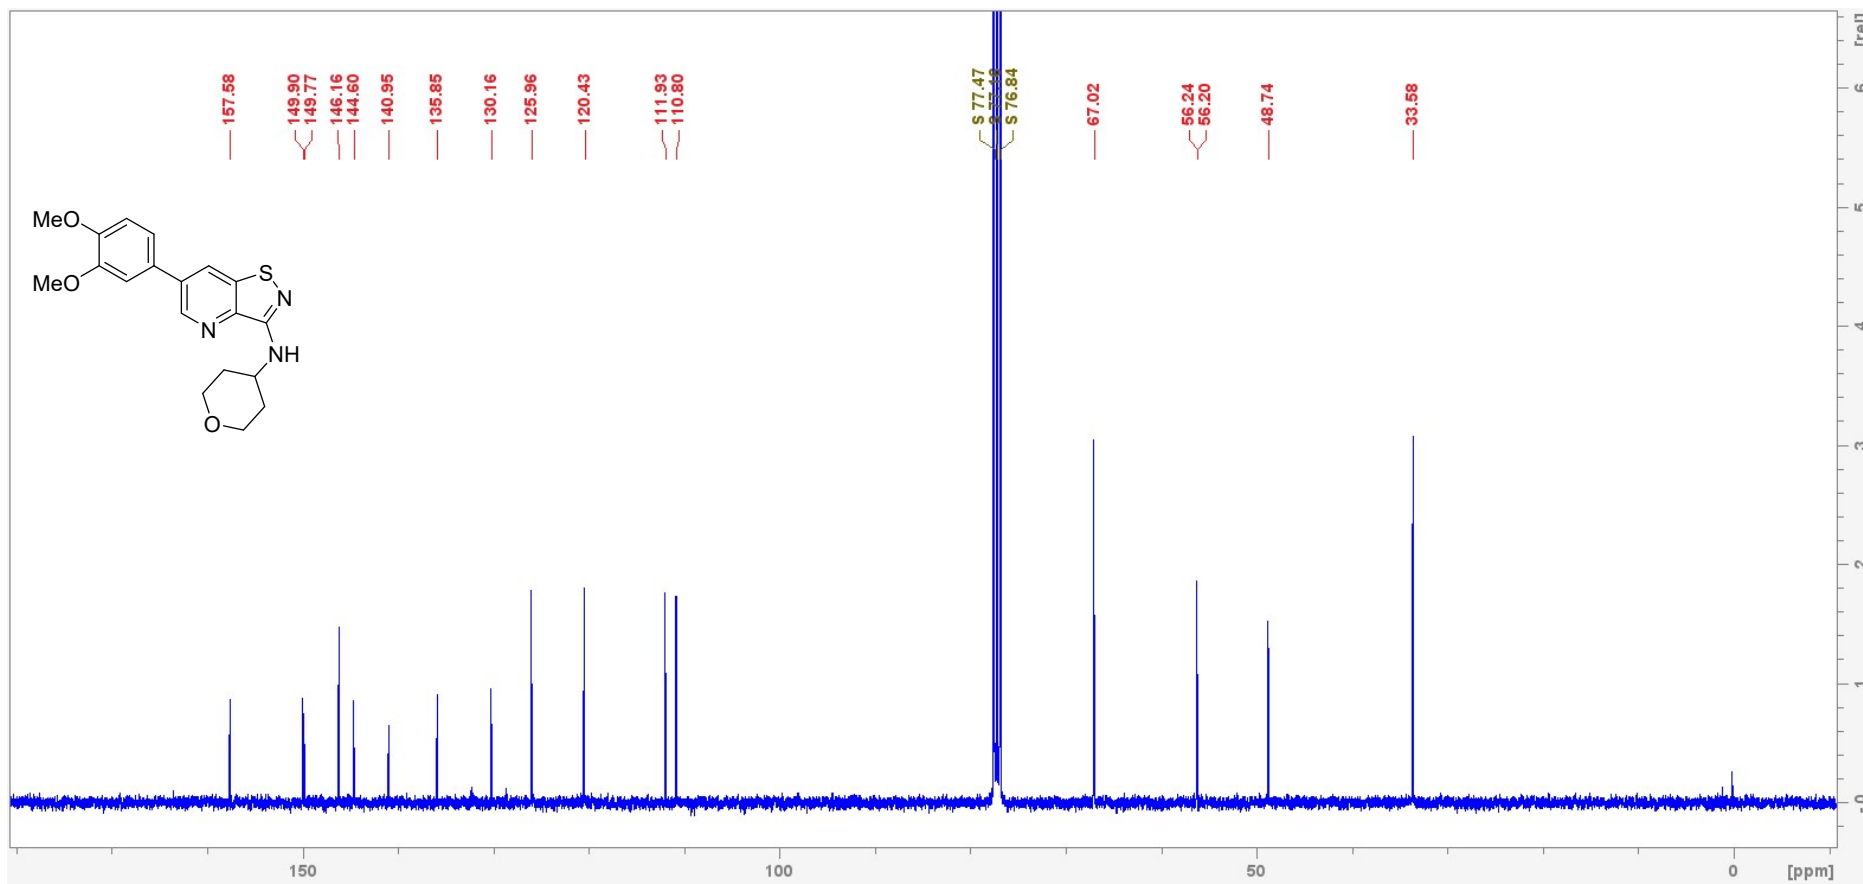

$^{13}\text{C}$  NMR spectrum (101 MHz,  $\text{CDCl}_3$ ) of **18b**

4-(6-(3,4-Dimethoxyphenyl)isothiazolo[4,5-b]pyridin-3-yl)morpholine (18c)

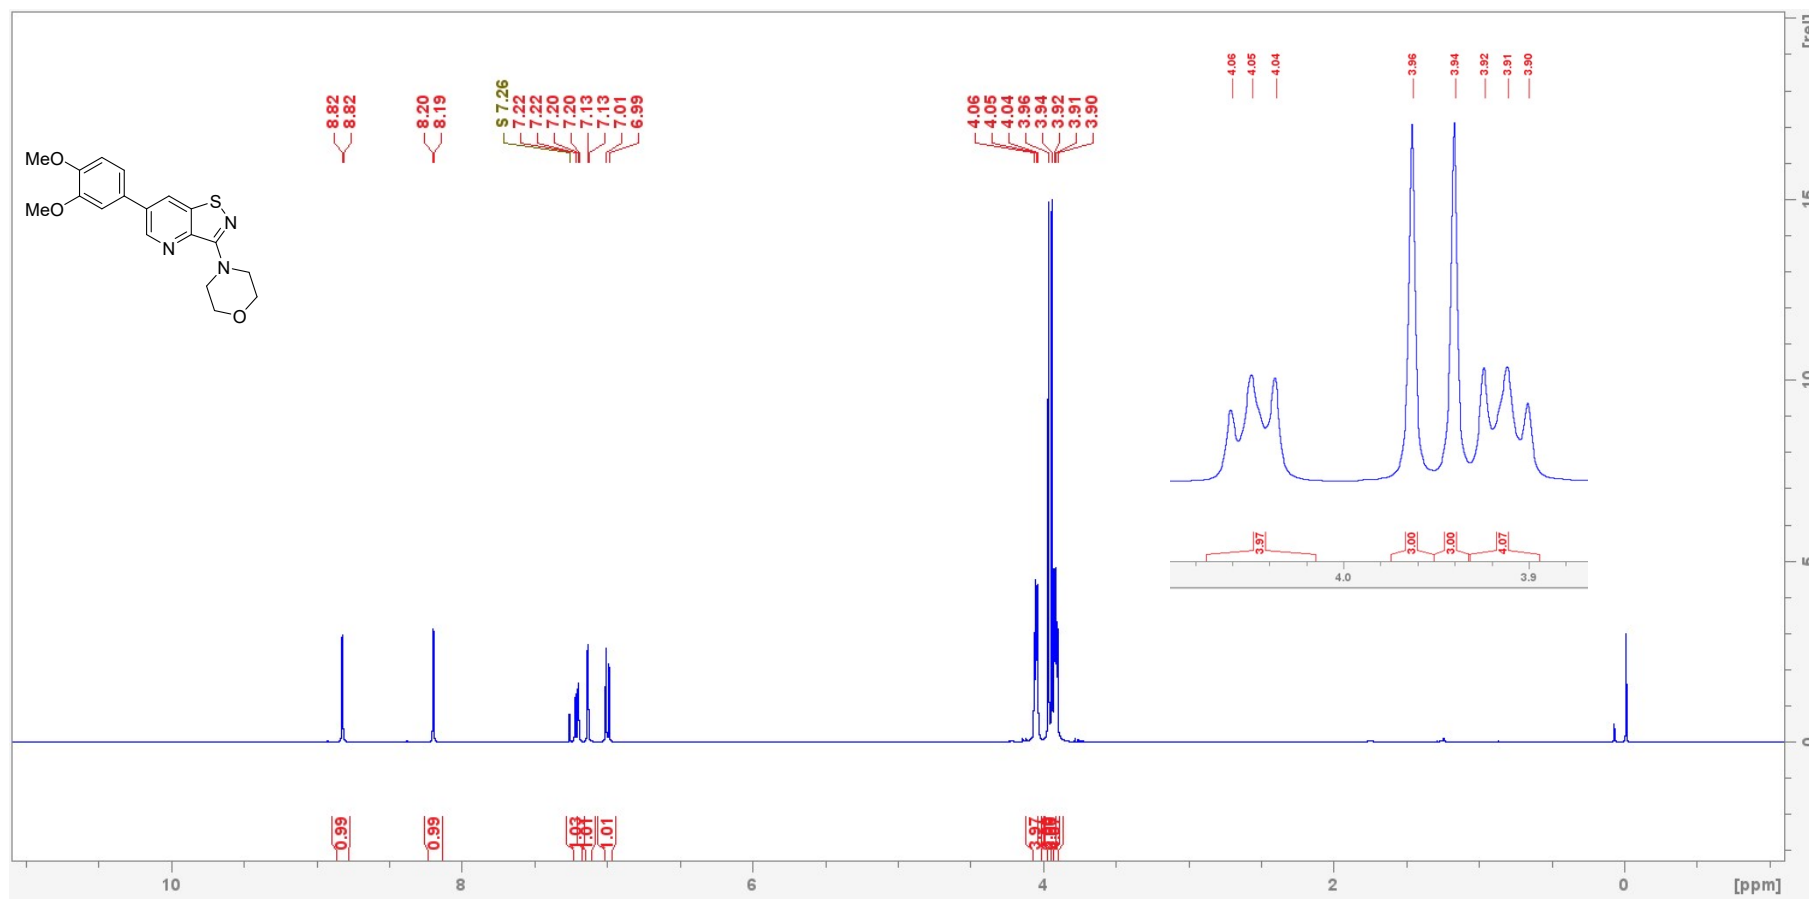

<sup>1</sup>H NMR spectrum (400 MHz, CDCl<sub>3</sub>) of 18c

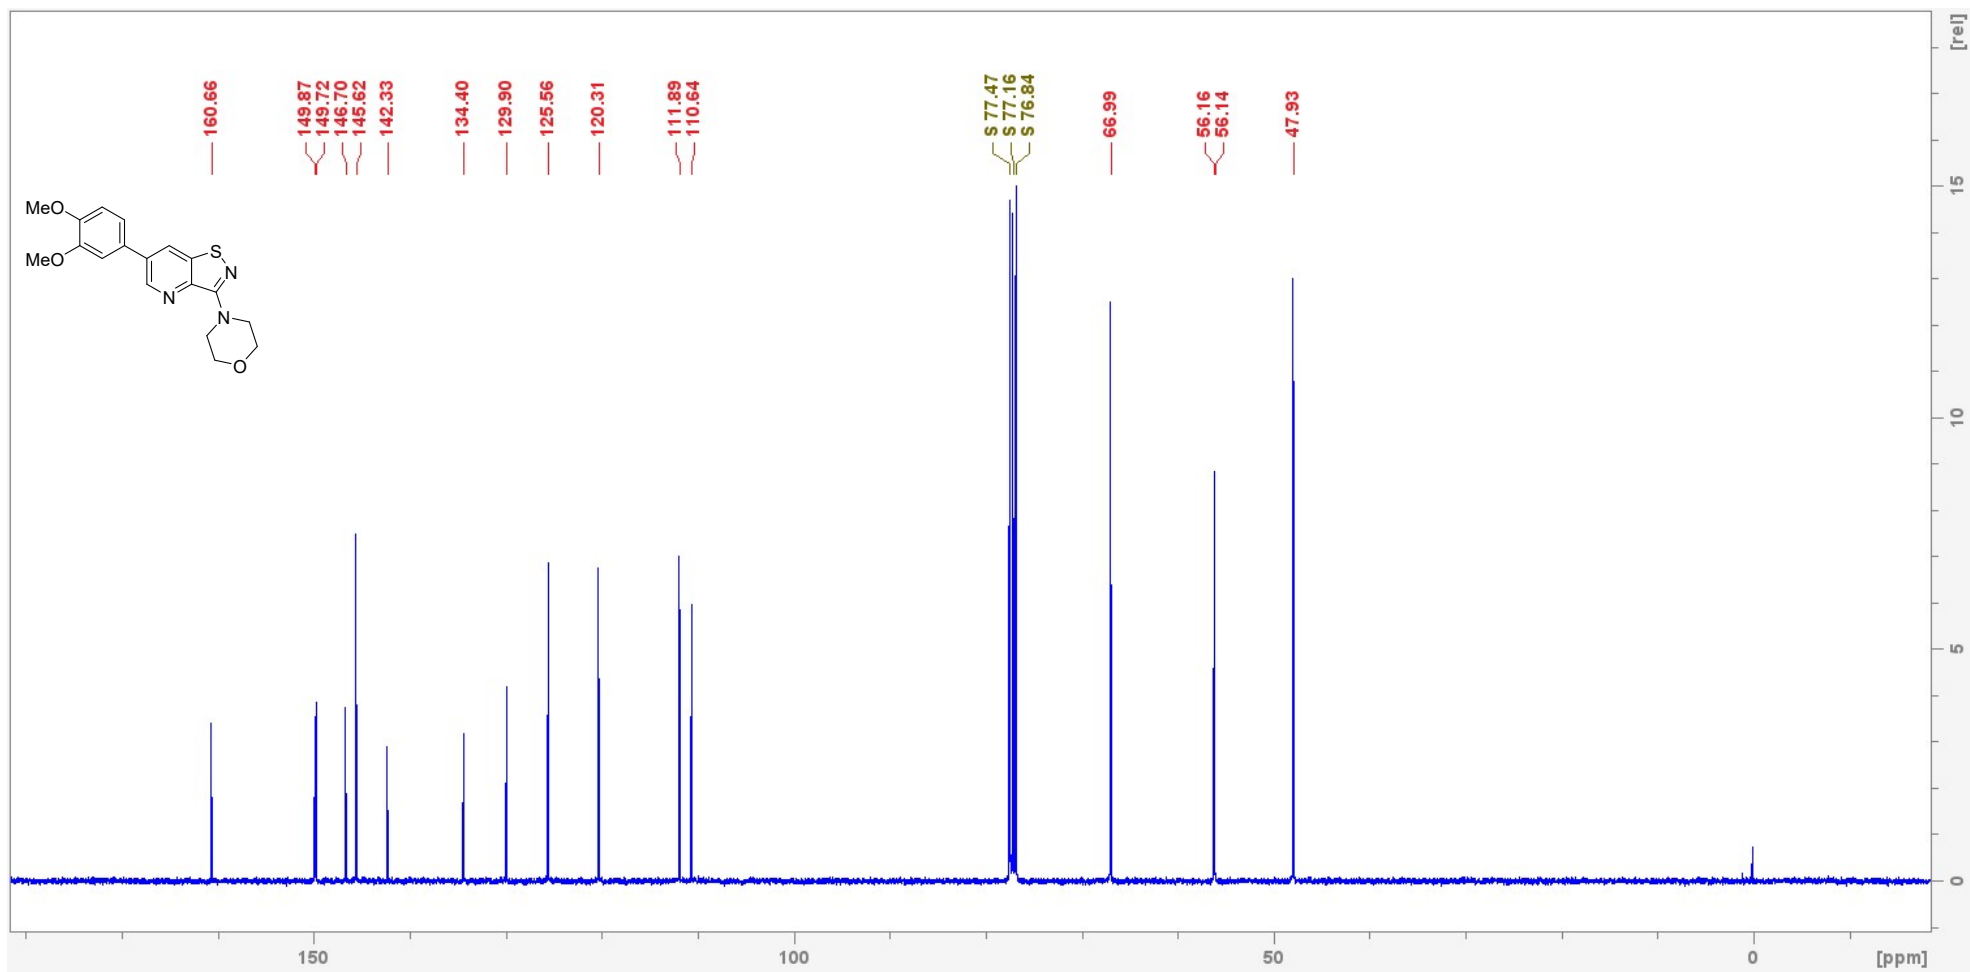

<sup>13</sup>C NMR spectrum (101 MHz, CDCl<sub>3</sub>) of **18c**

**(2S,6R)-4-(6-(3,4-Dimethoxyphenyl)isothiazolo[4,5-b]pyridin-3-yl)-2,6-dimethylmorpholine (18d)**

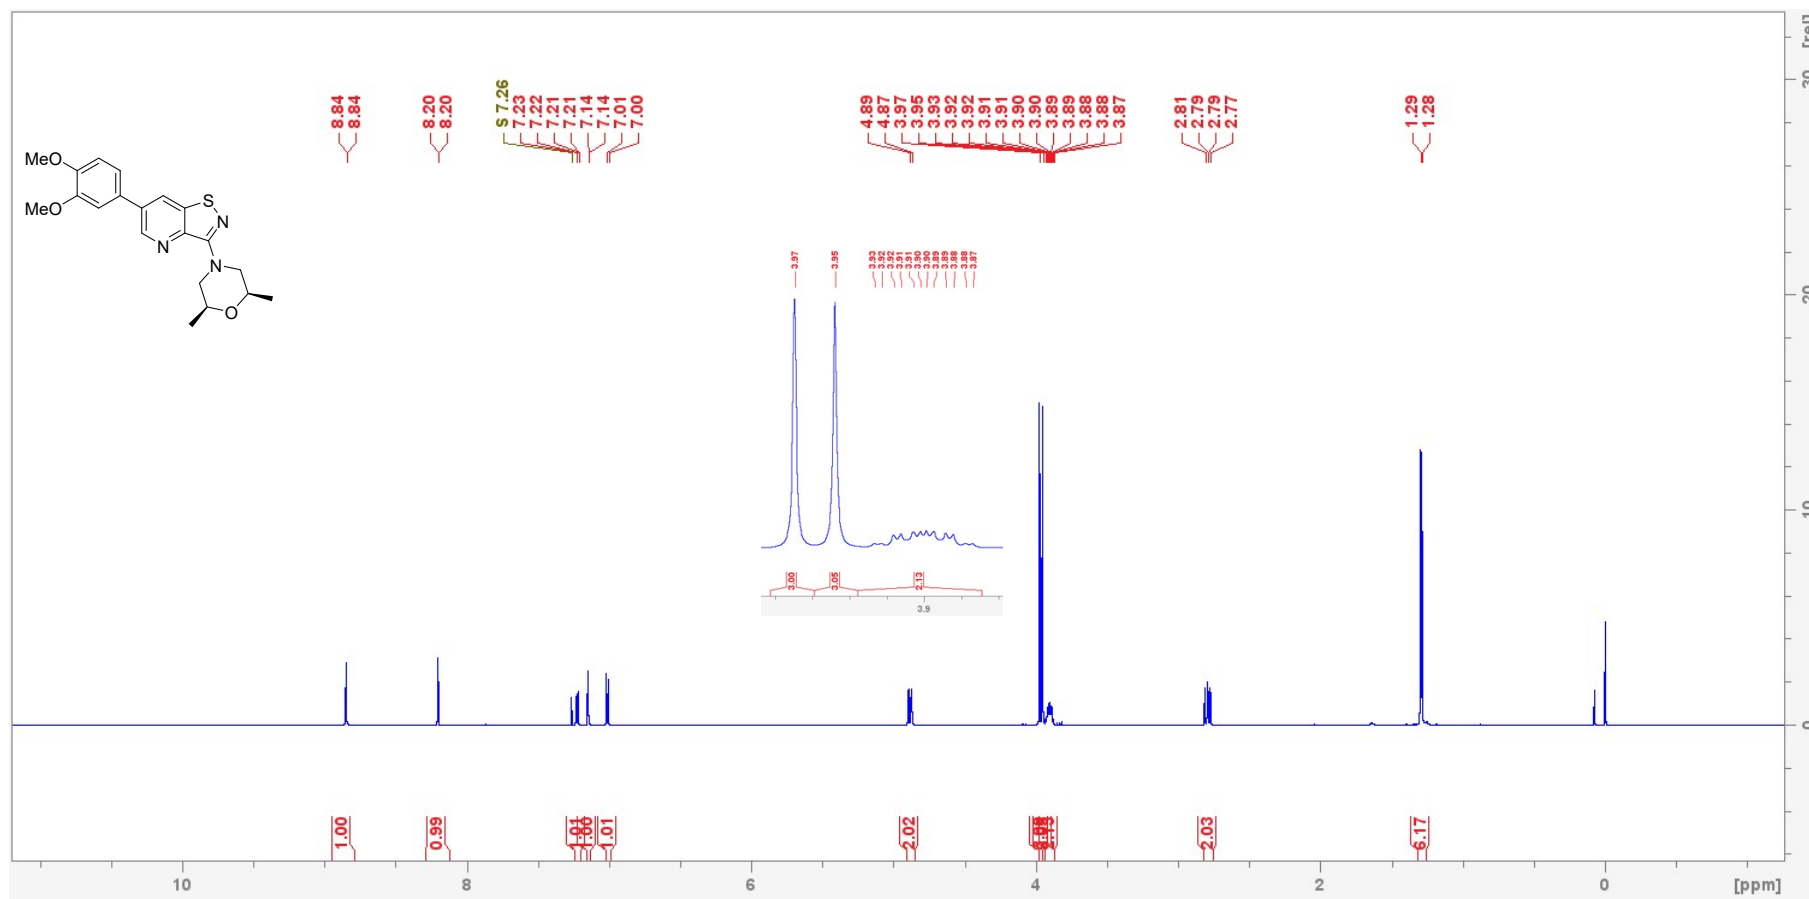

<sup>1</sup>H NMR spectrum (600 MHz, CDCl<sub>3</sub>) of **18d**

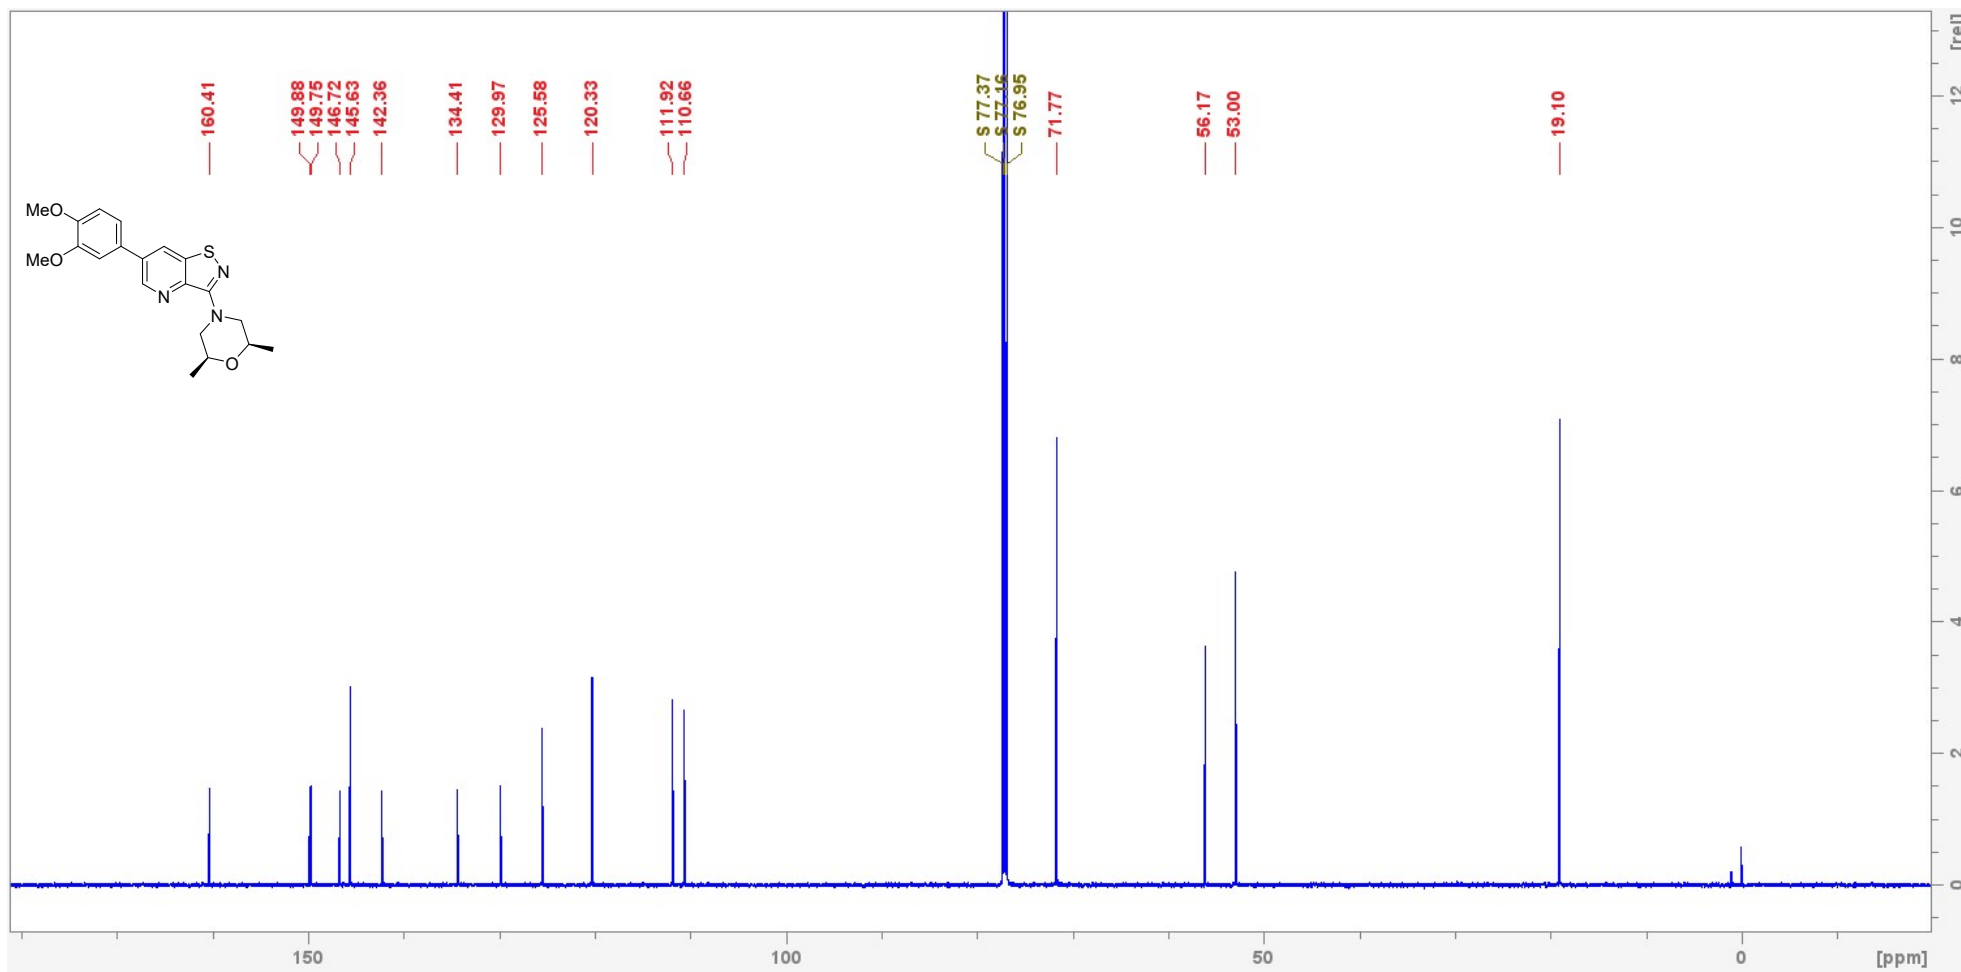

<sup>13</sup>C NMR spectrum (151 MHz, CDCl<sub>3</sub>) of **18d**



N-((1-(6-(3,4-dimethoxyphenyl)isothiazolo[4,5-b]pyridin-3-yl)piperidin-3-yl)methyl)cyclopropanecarboxamide (18e)

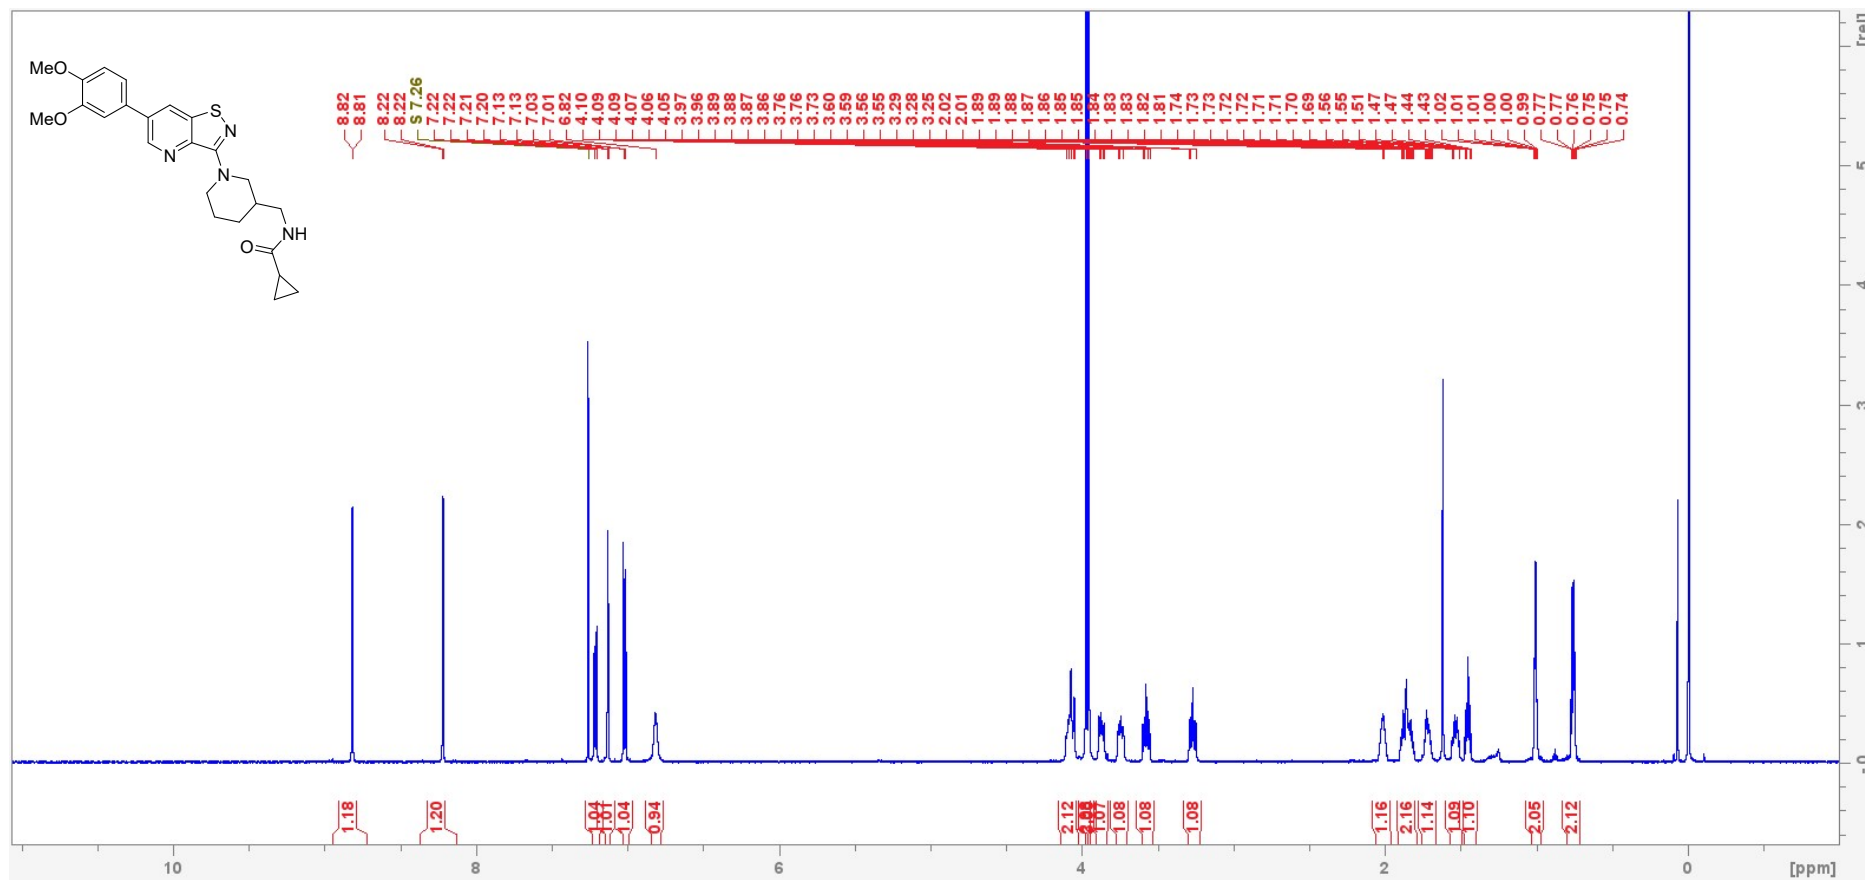

<sup>1</sup>H NMR spectrum (600 MHz, CDCl<sub>3</sub>) of 18e

Zoom-in on the aliphatic area:

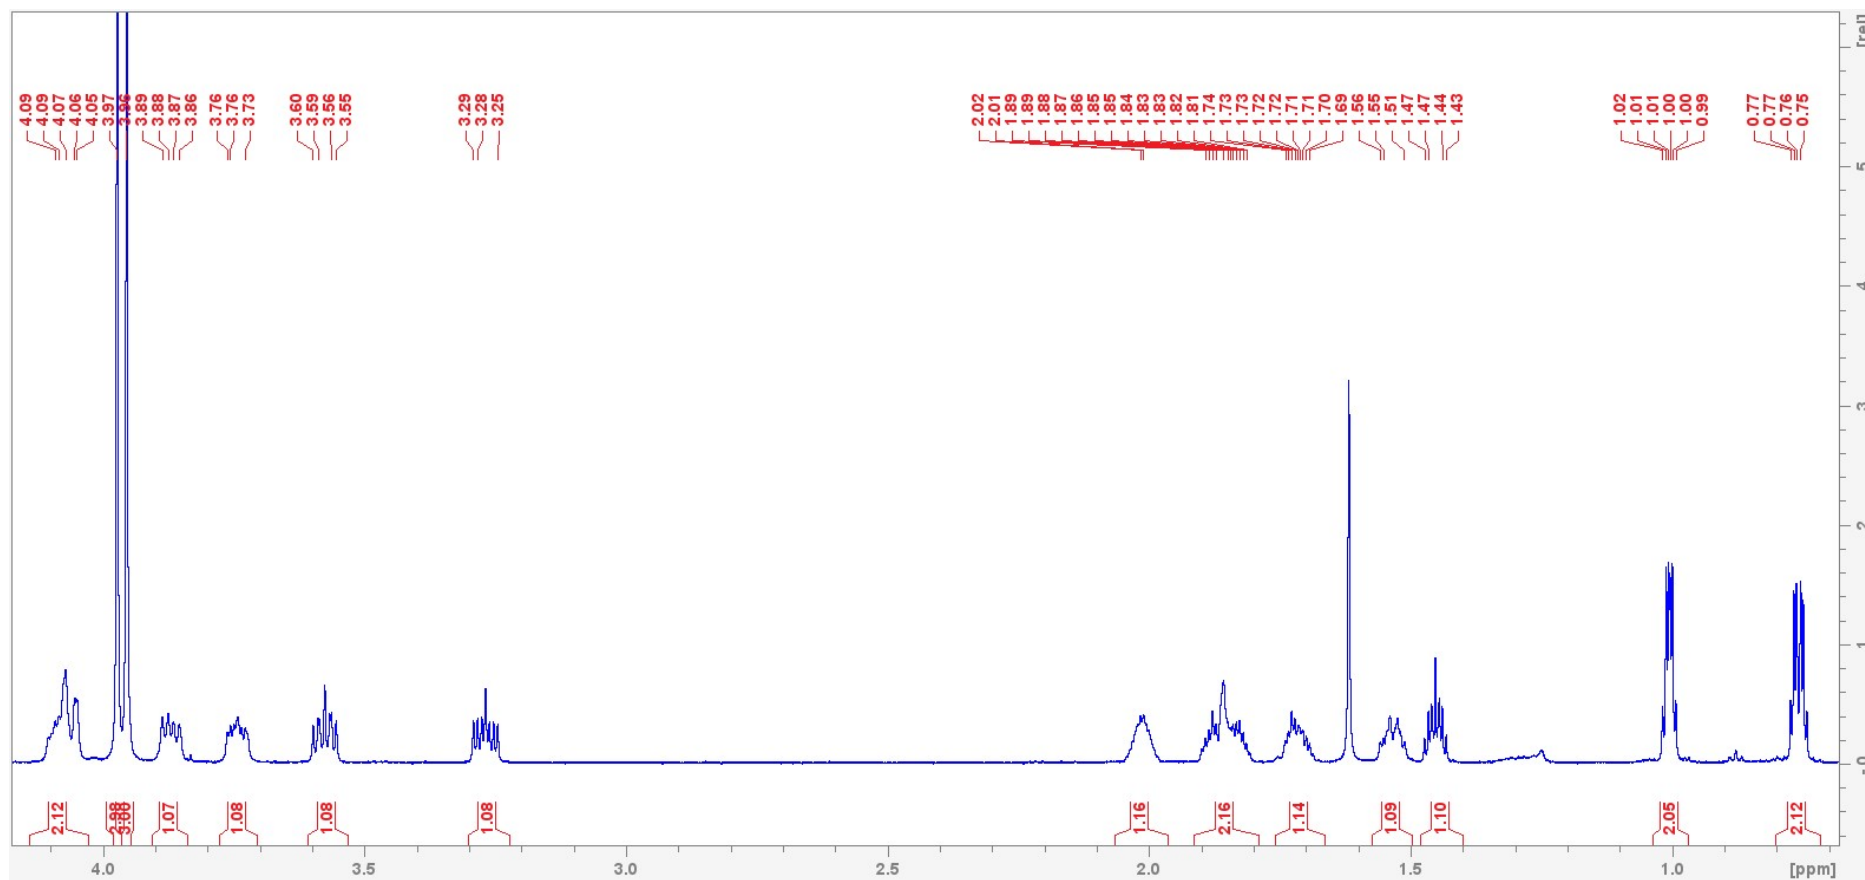

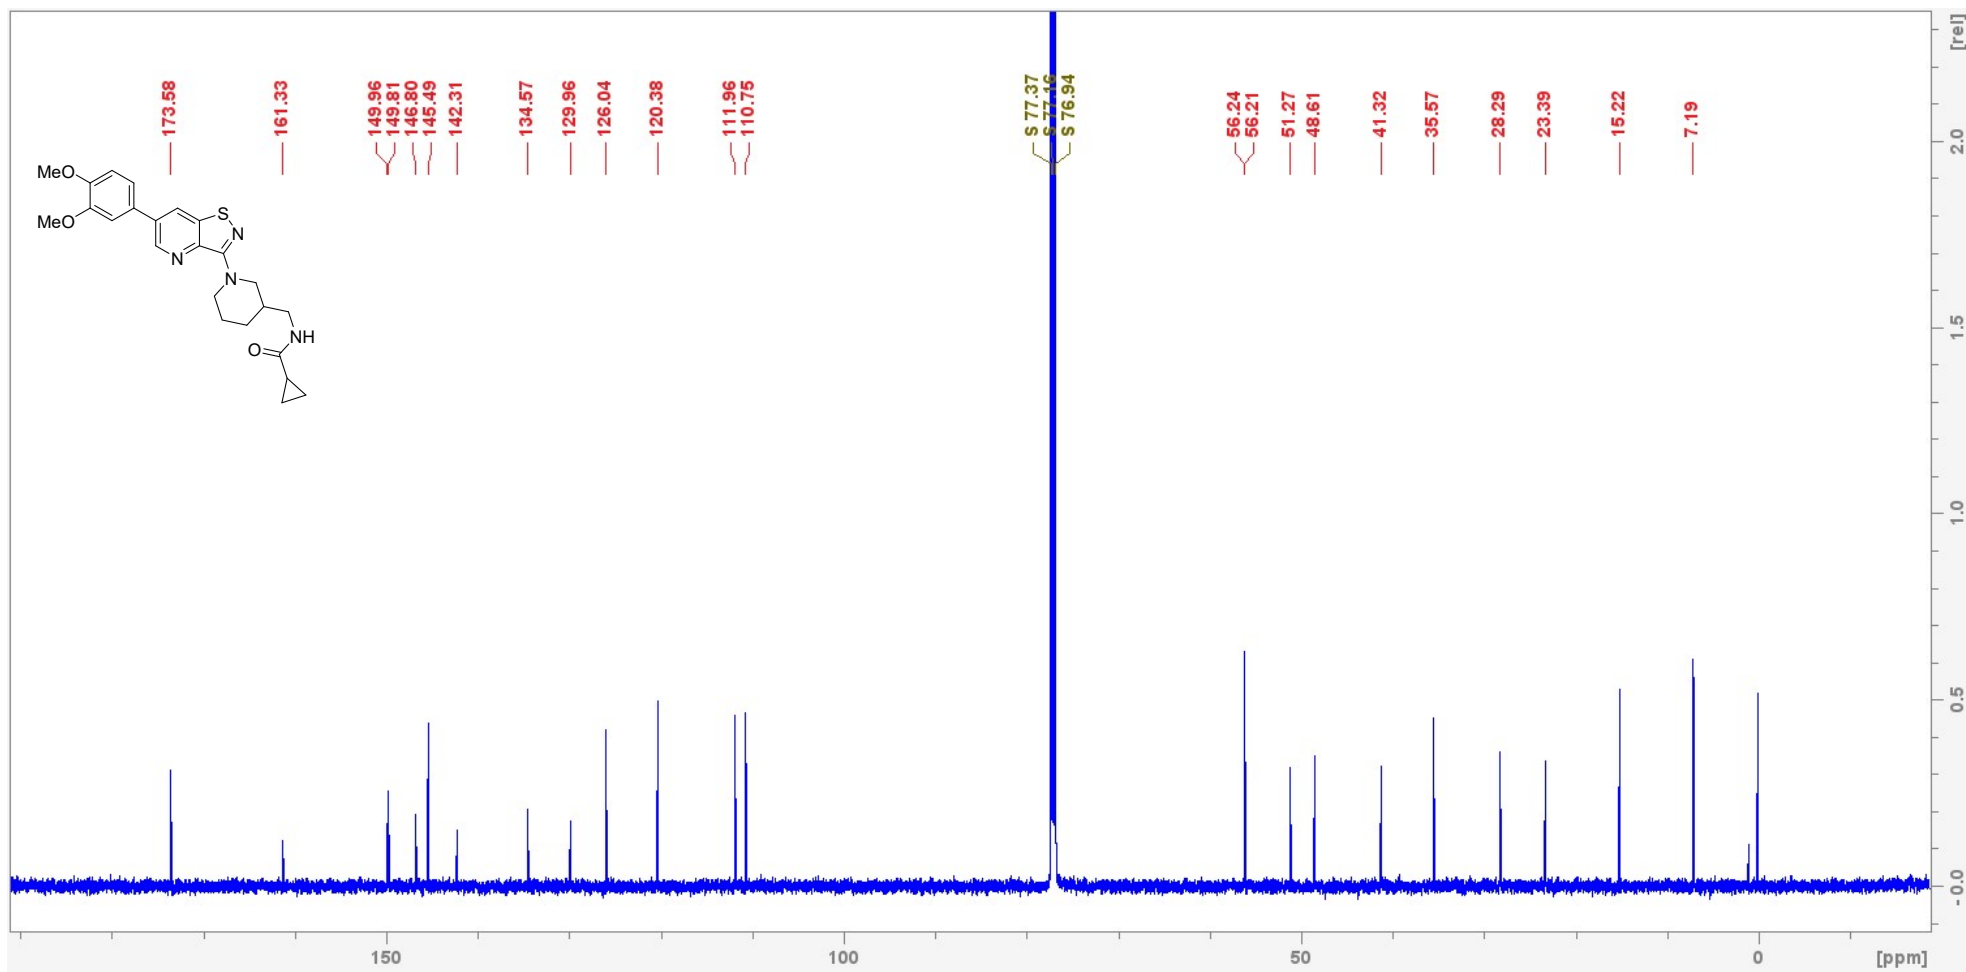

$^{13}\text{C}$  NMR spectrum (151 MHz,  $\text{CDCl}_3$ ) of **18e**

6-(3,4-Dimethoxyphenyl)-3-isopropoxyisothiazolo[4,5-*b*]pyridine (**18f**)

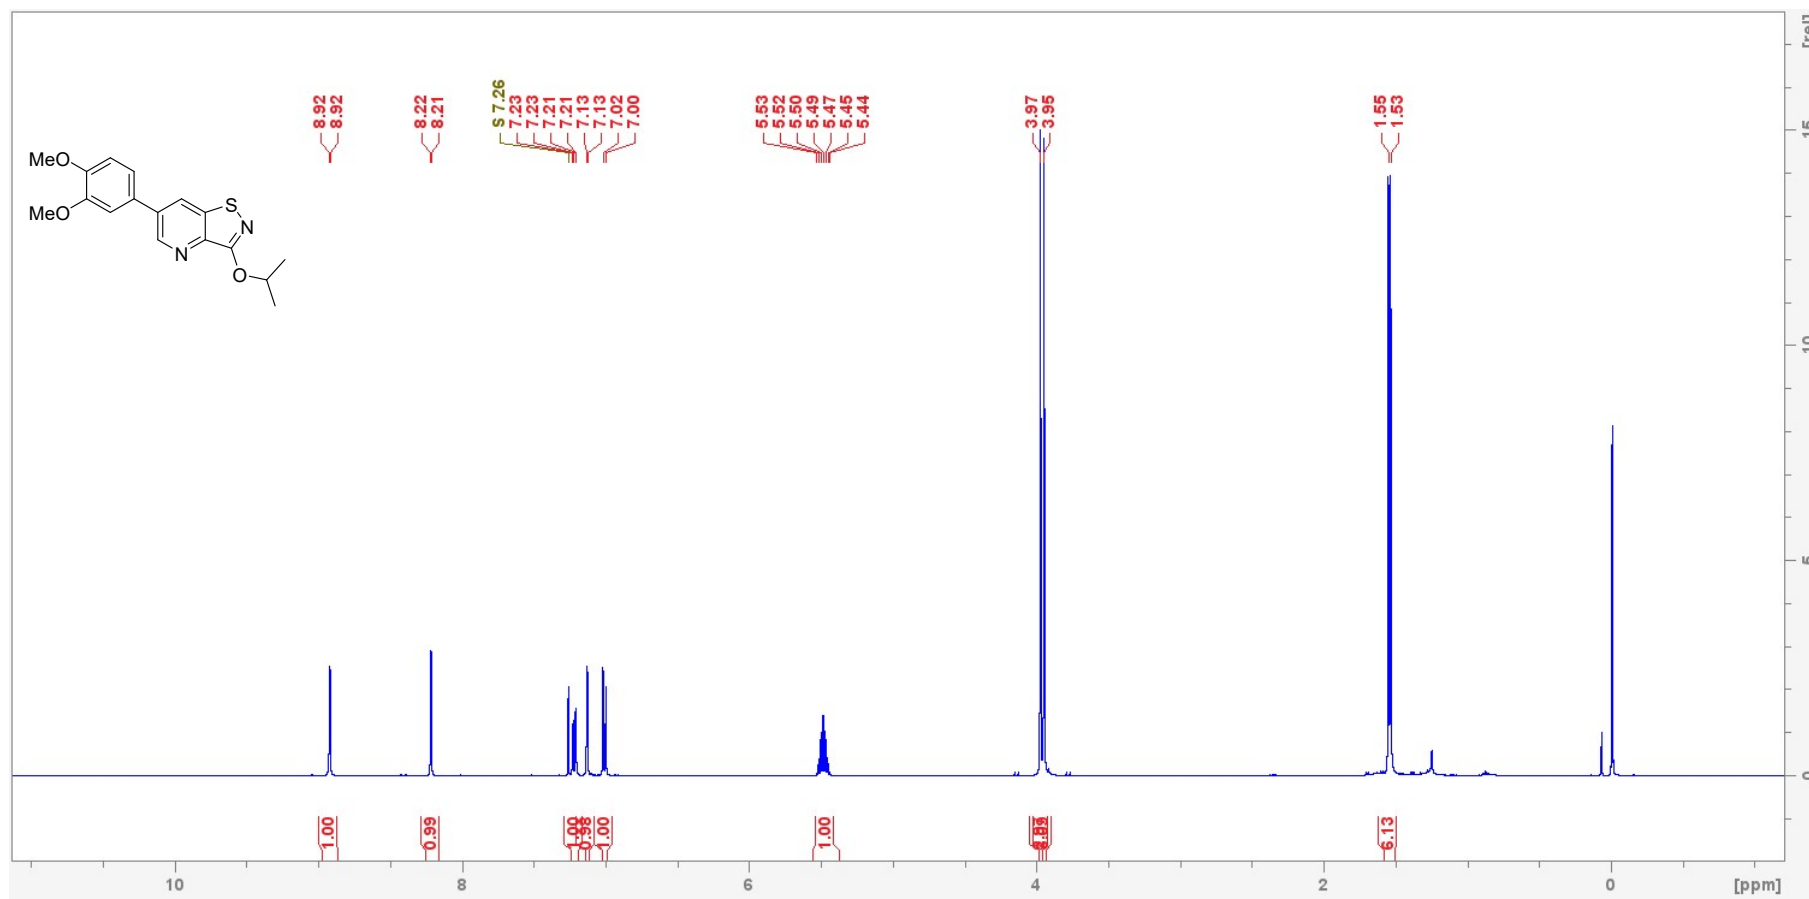

<sup>1</sup>H NMR spectrum (400 MHz, CDCl<sub>3</sub>) of **18f**

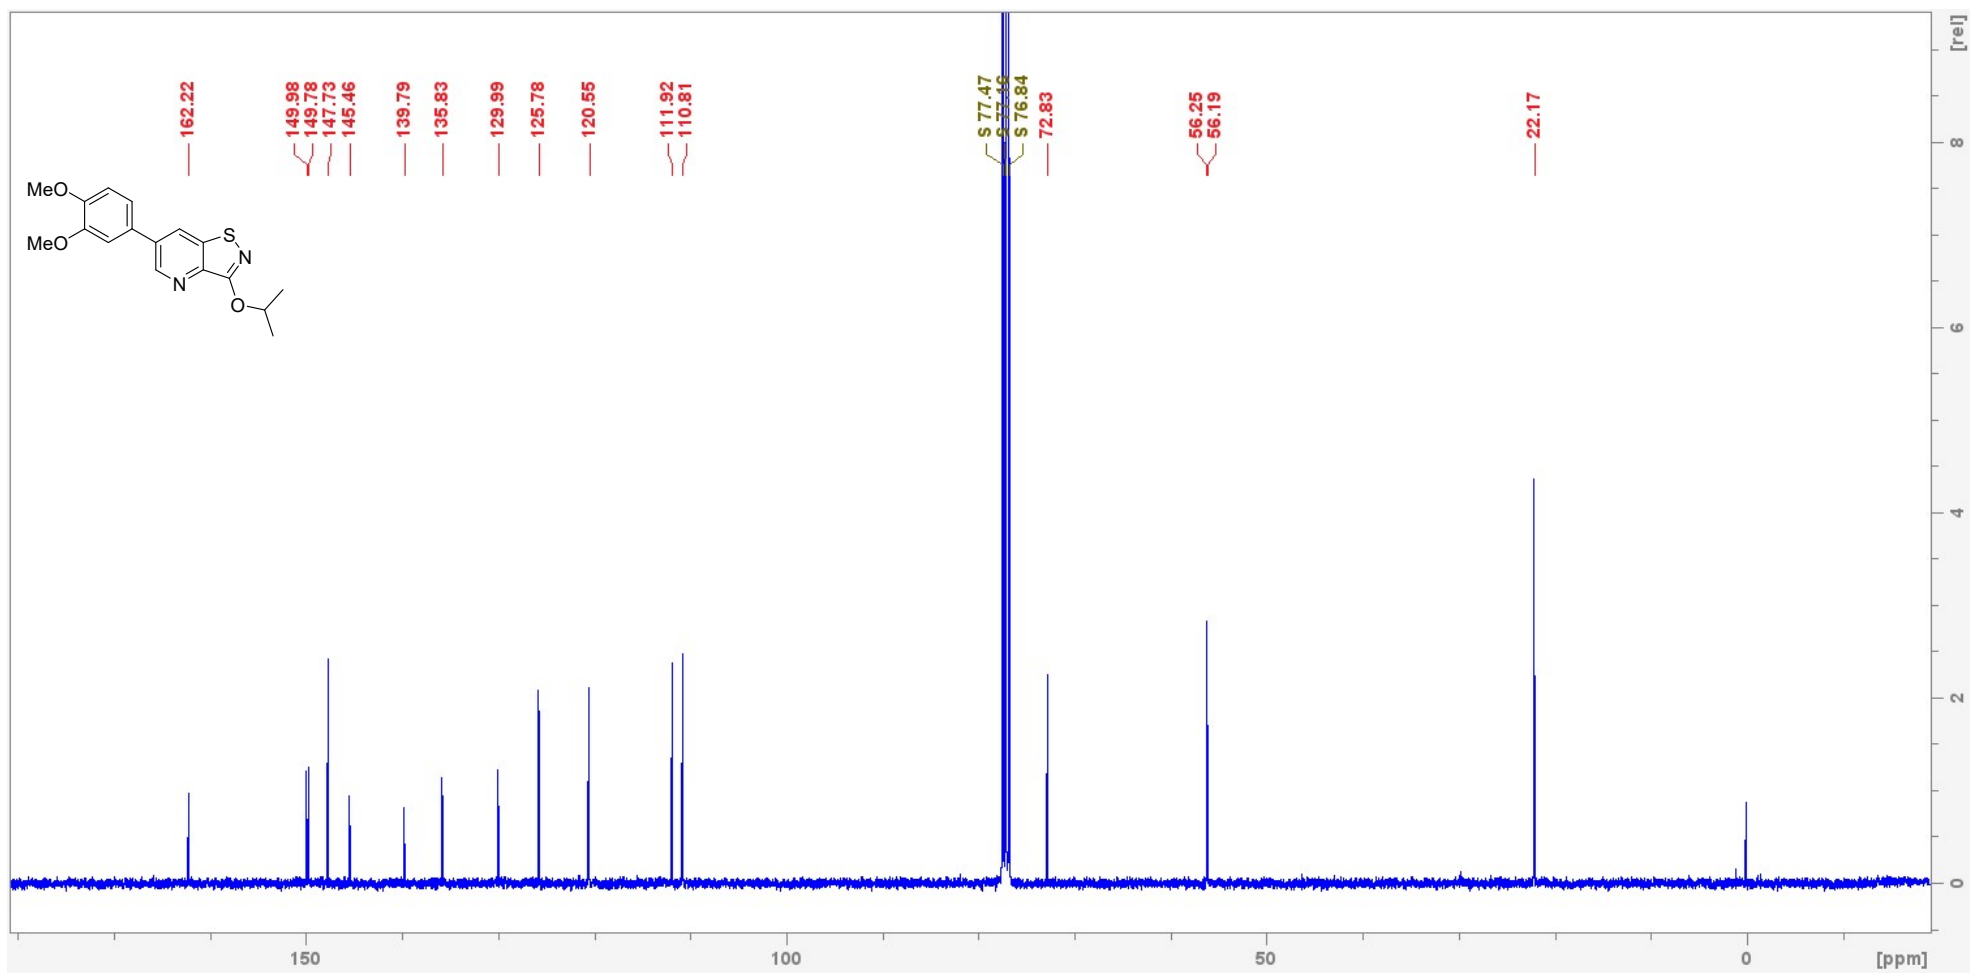

<sup>13</sup>C NMR spectrum (101 MHz, CDCl<sub>3</sub>) of **18f**

6-(3,4-Dimethoxyphenyl)-3-(phenylthio)isothiazolo[4,5-b]pyridine (18g)

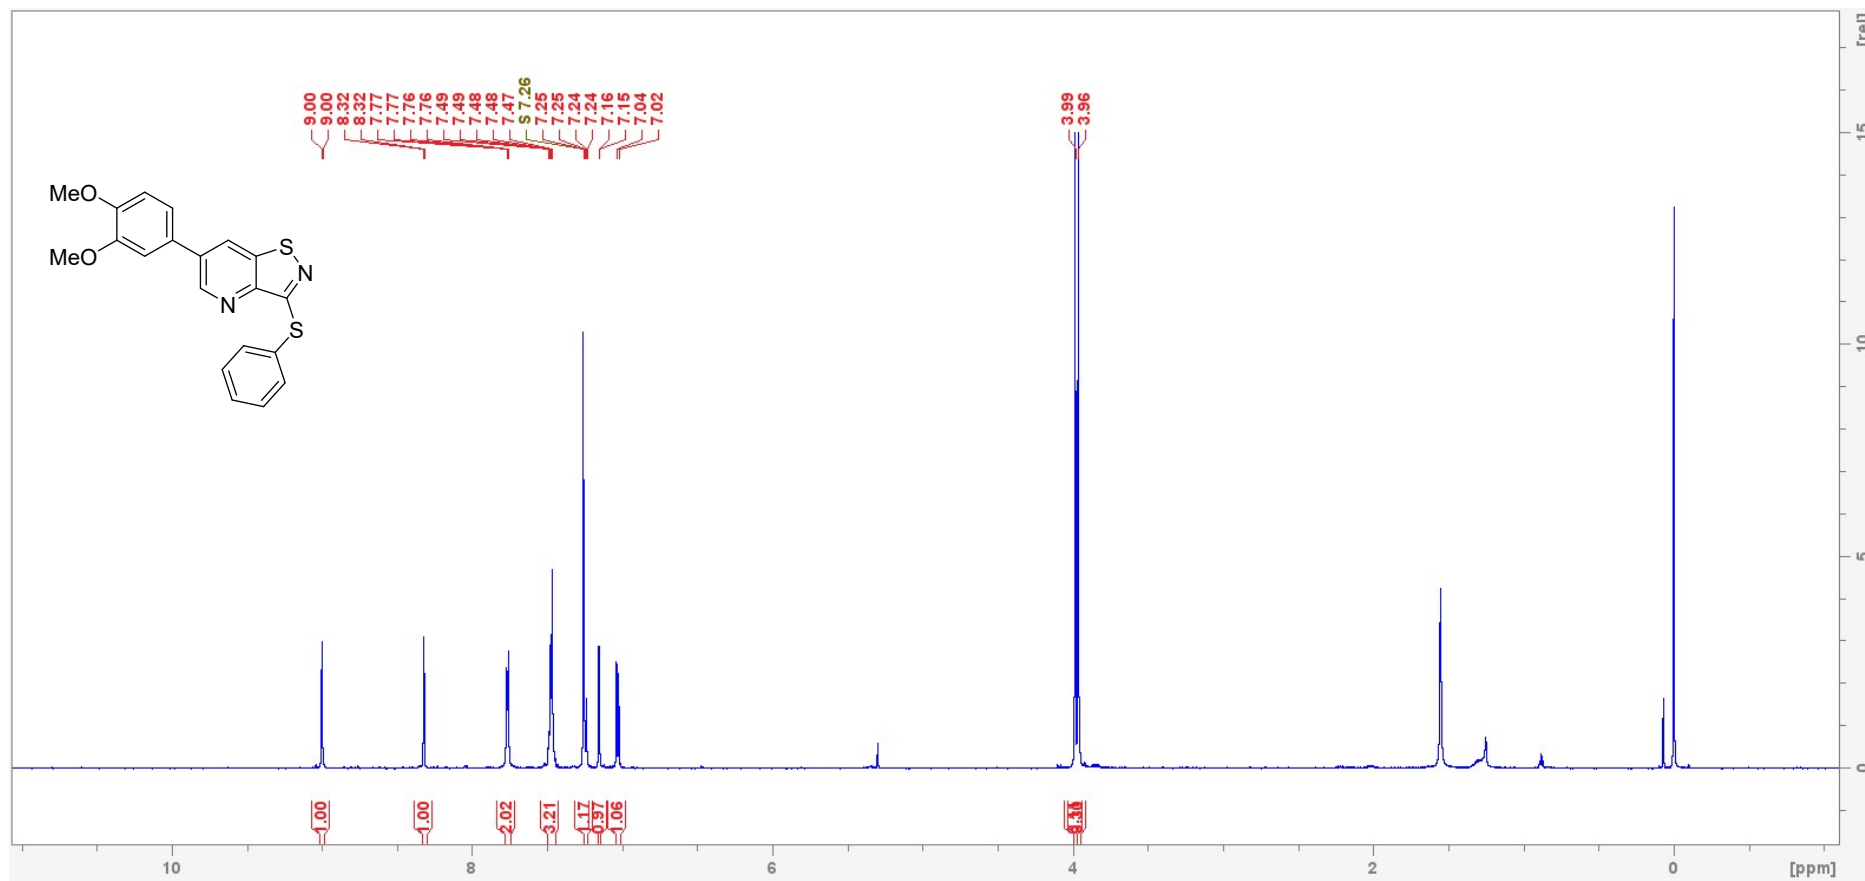

<sup>1</sup>H NMR spectrum (600 MHz, CDCl<sub>3</sub>) of 18g

Zoom-in on the aromatic area:

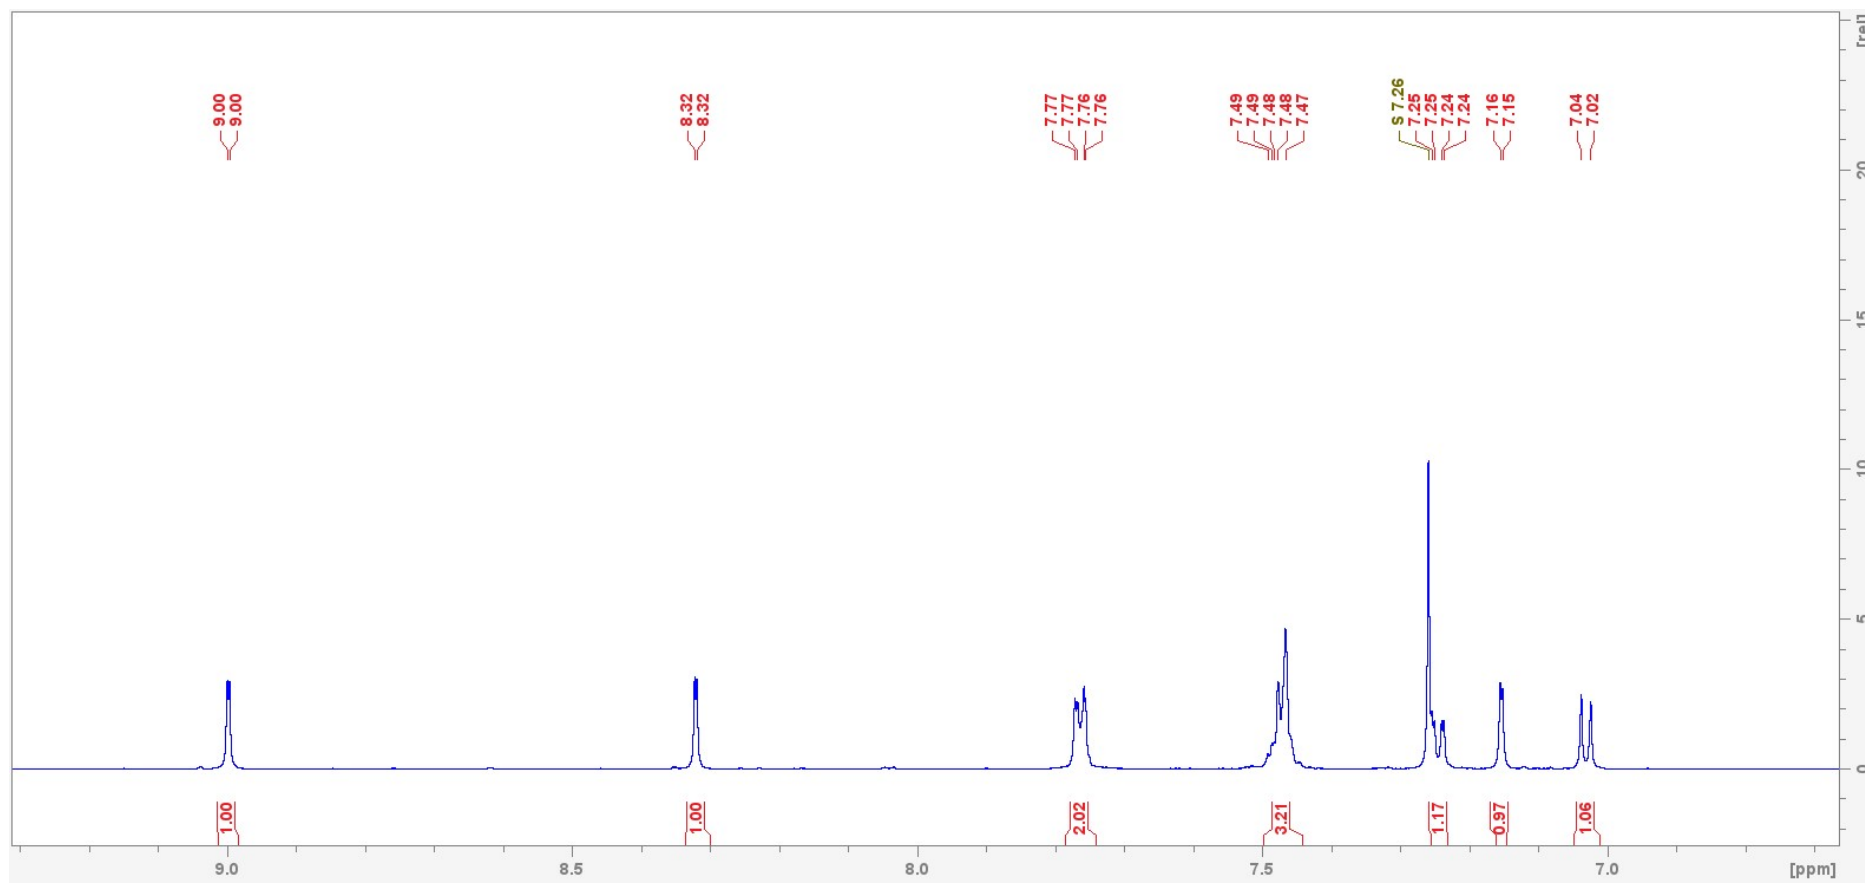

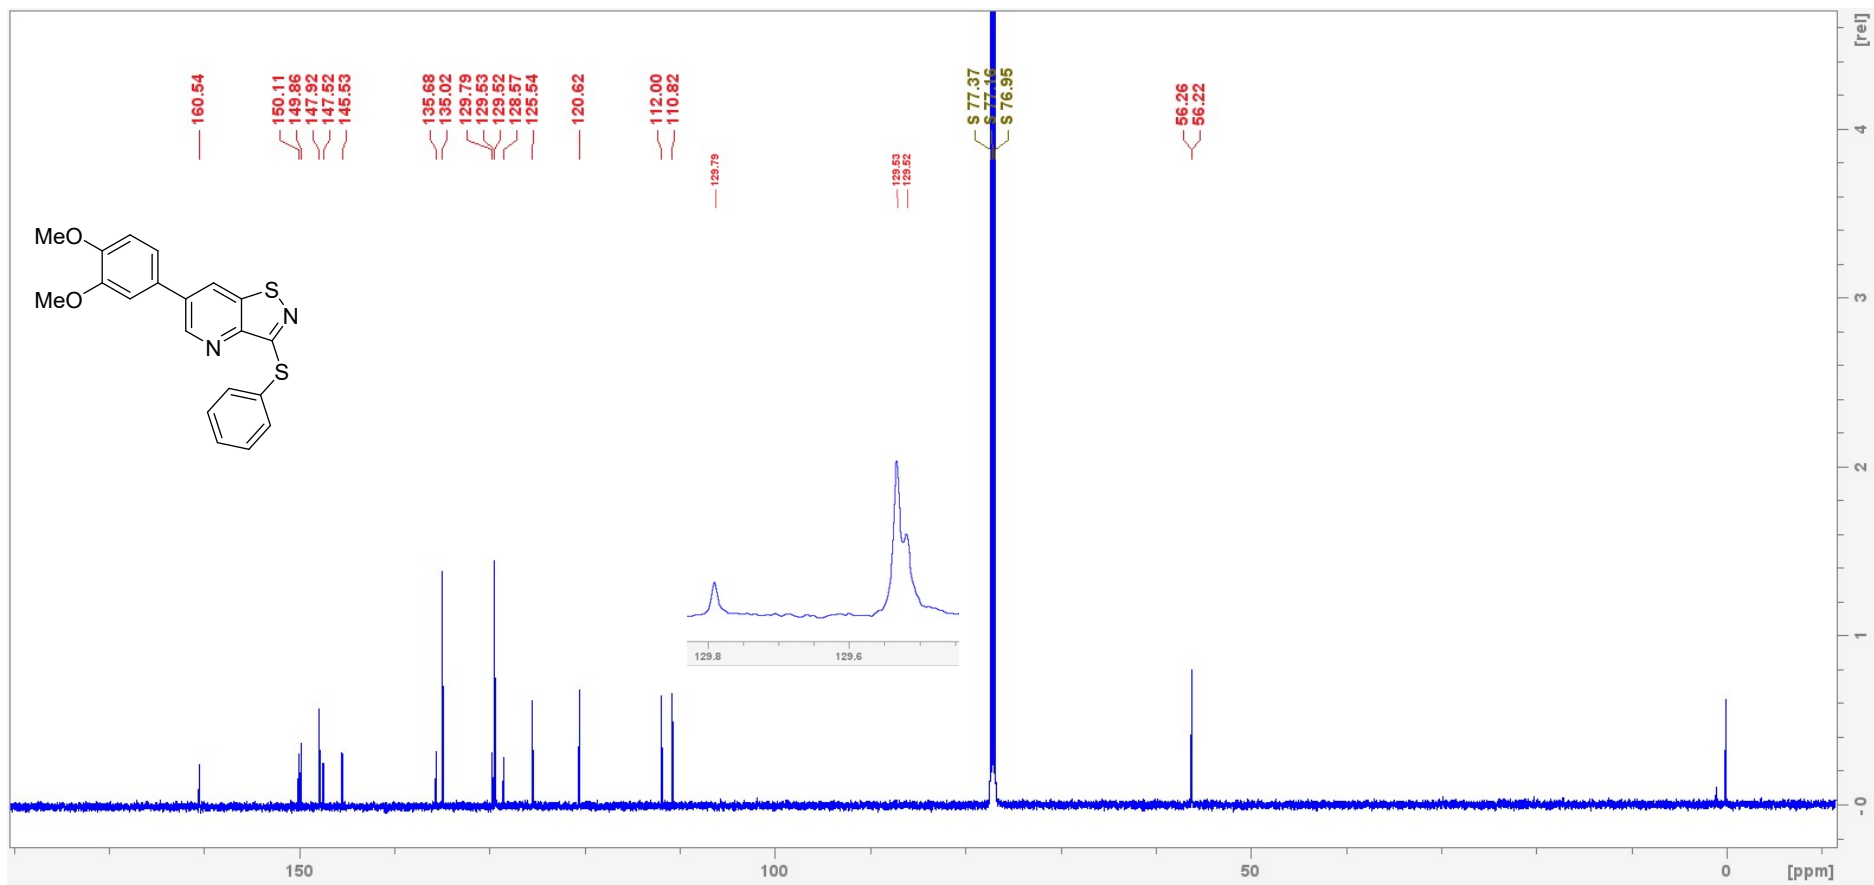

$^{13}\text{C}$  NMR spectrum (151 MHz,  $\text{CDCl}_3$ ) of **18g**



**6-(3,4-Dimethoxyphenyl)-3-(4-(methoxymethyl)-1H-1,2,3-triazol-1-yl)isothiazolo[4,5-b]pyridine (18h)**

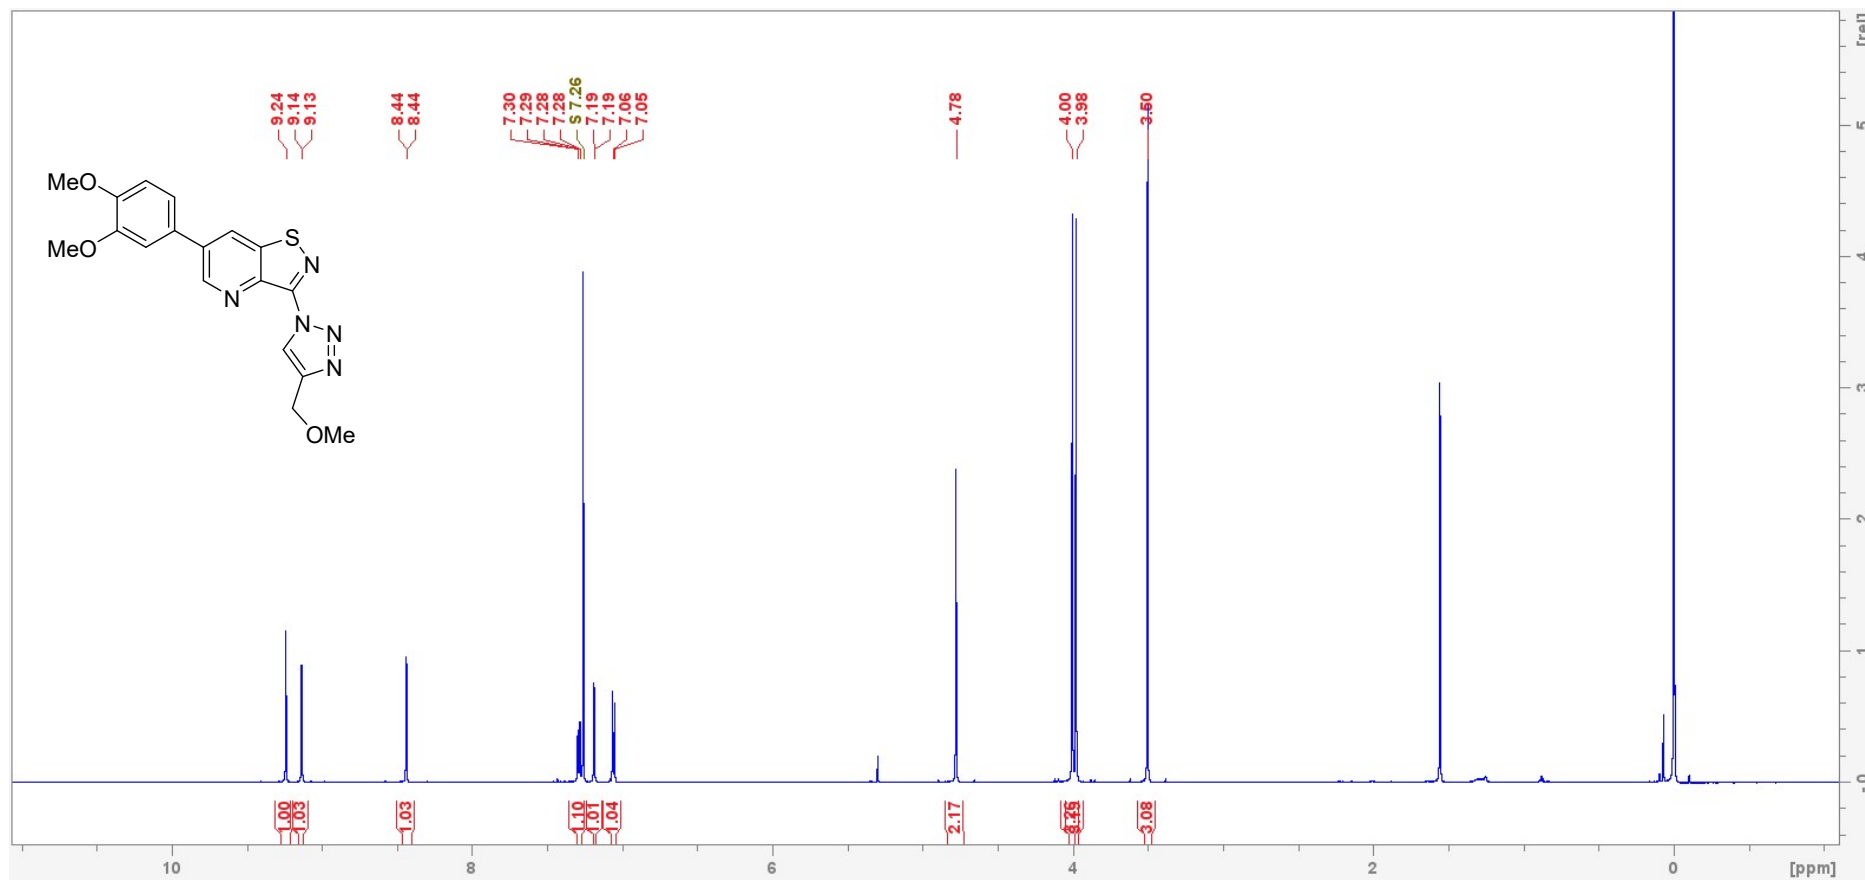

<sup>1</sup>H NMR spectrum (600 MHz, CDCl<sub>3</sub>) of **18h**

Zoom-in on the aromatic area:

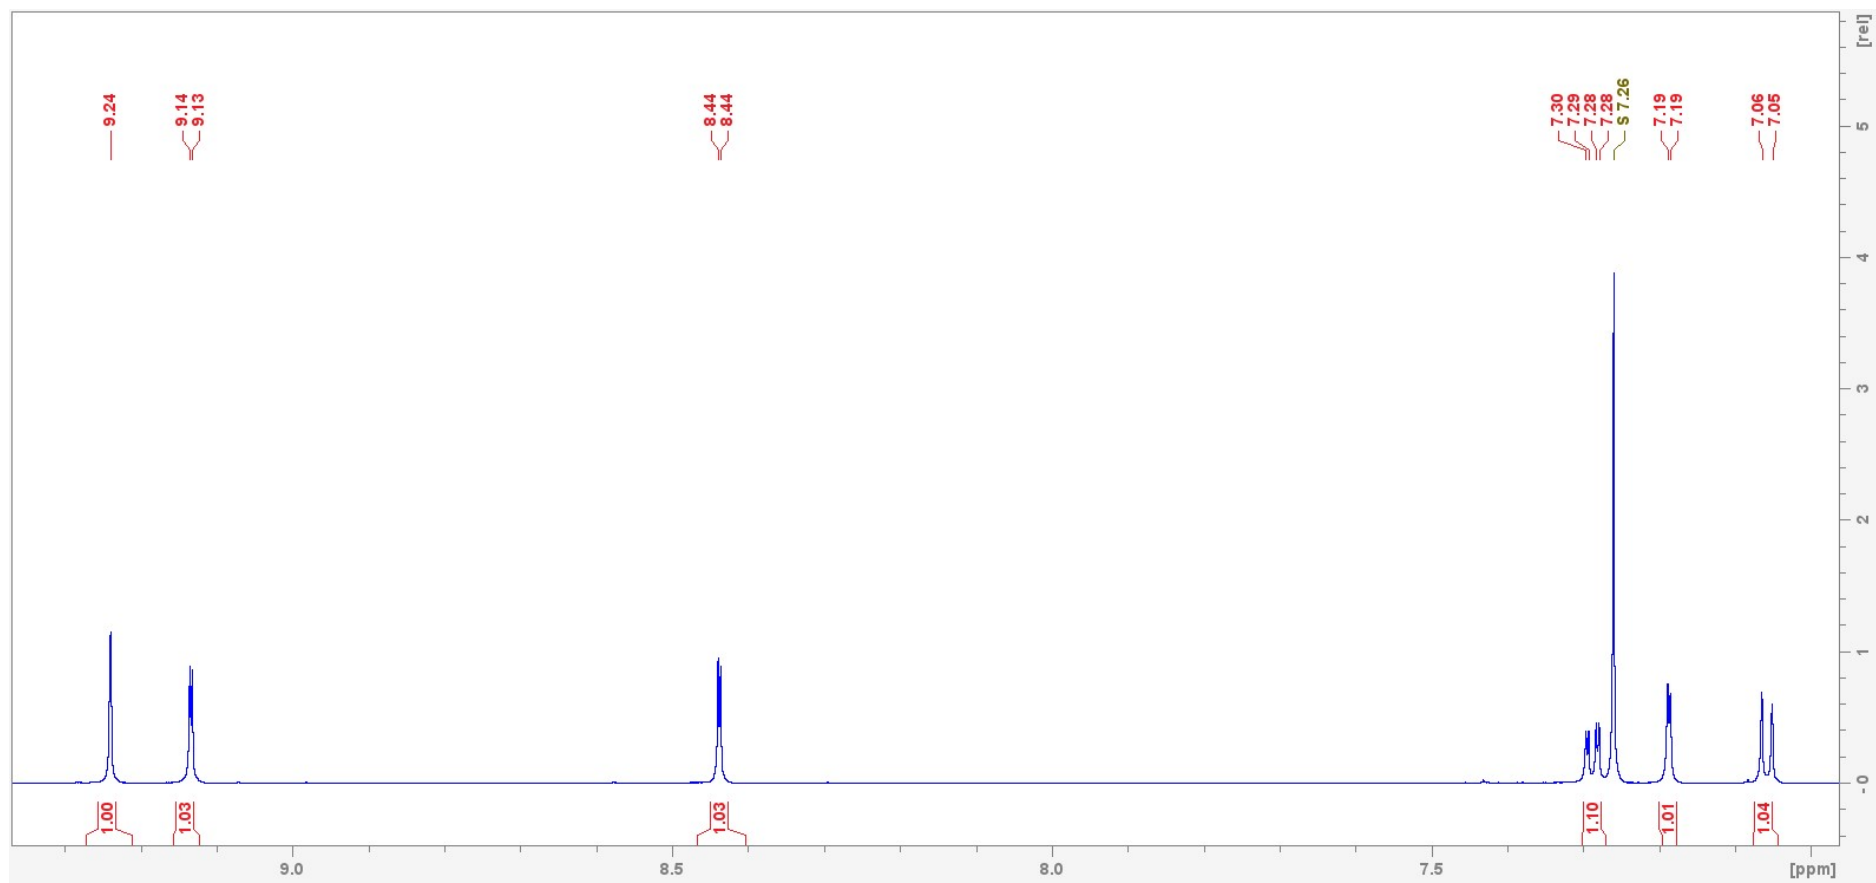

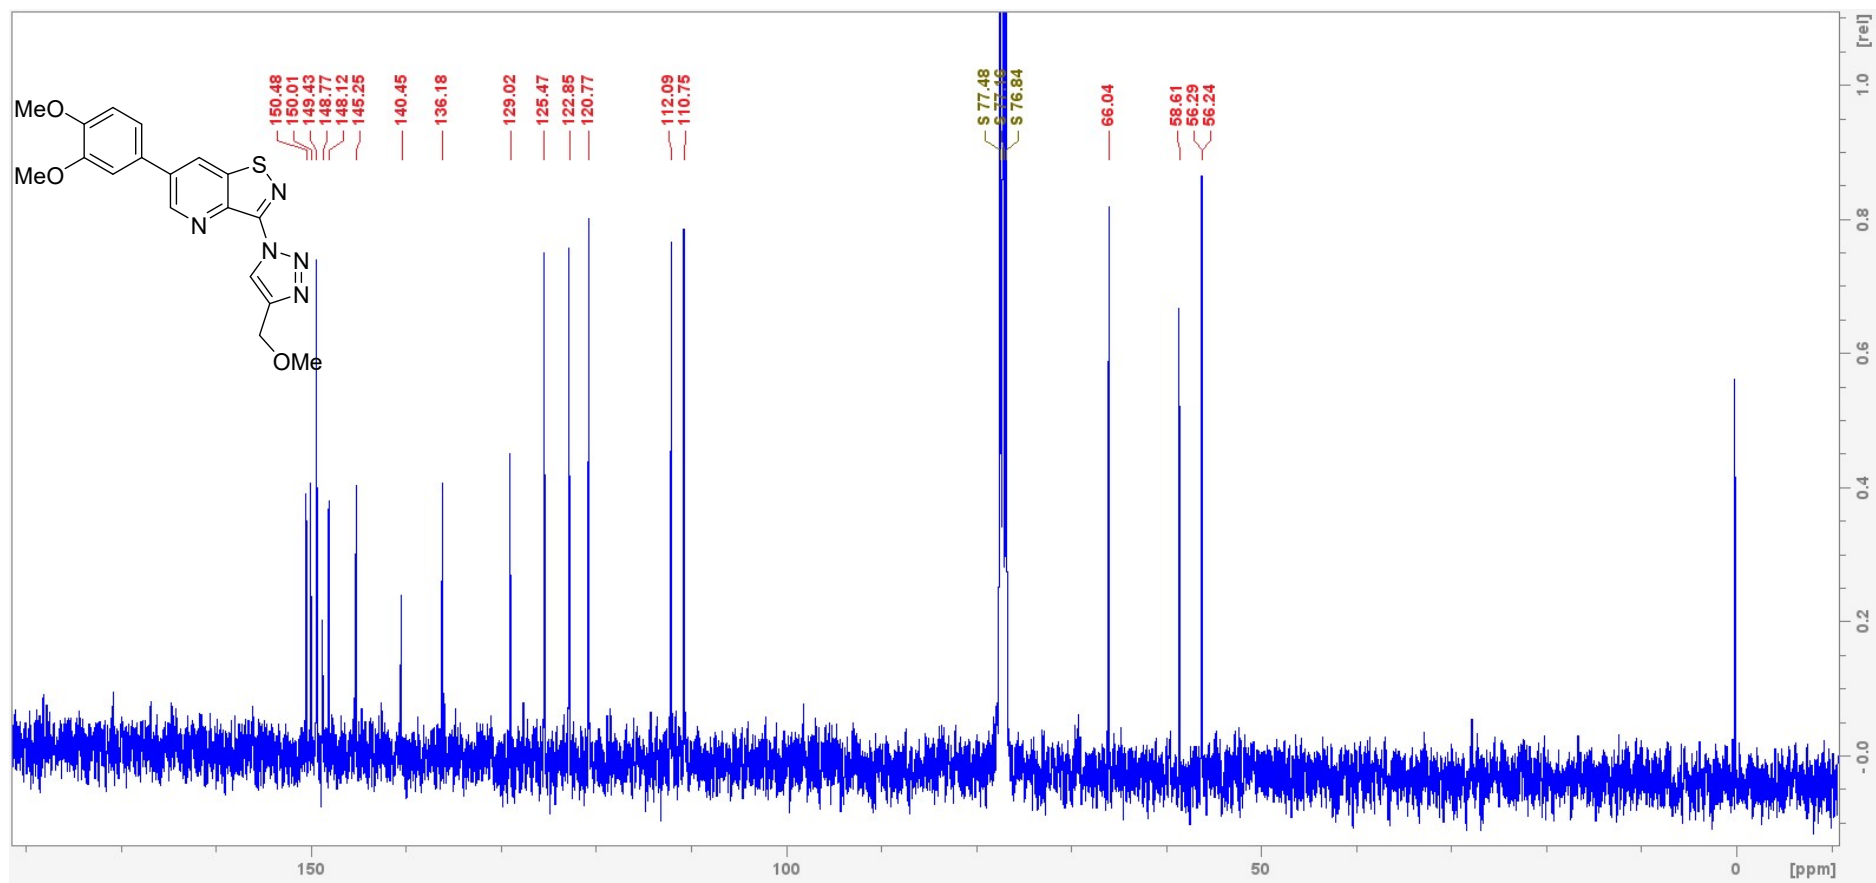

<sup>13</sup>C NMR spectrum (101 MHz, CDCl<sub>3</sub>) of **18h**

Zoom-in on the aromatic area:

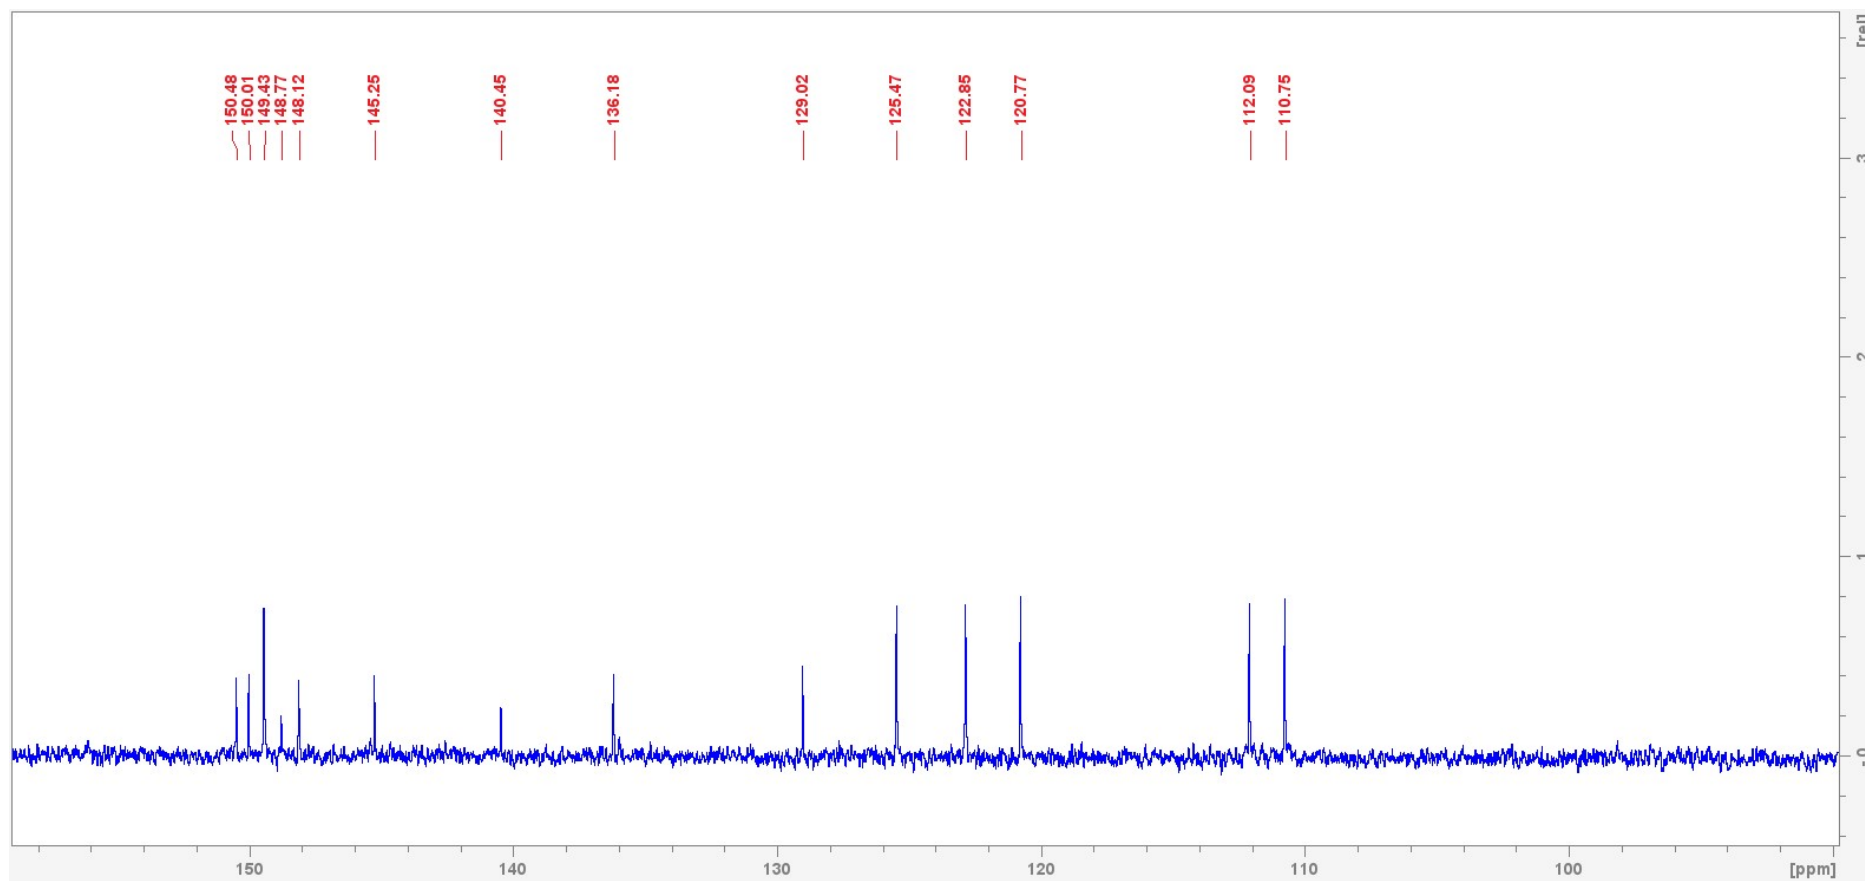

**3,6-Bis(3,4-dimethoxyphenyl)isothiazolo[4,5-*b*]pyridine (18j)**

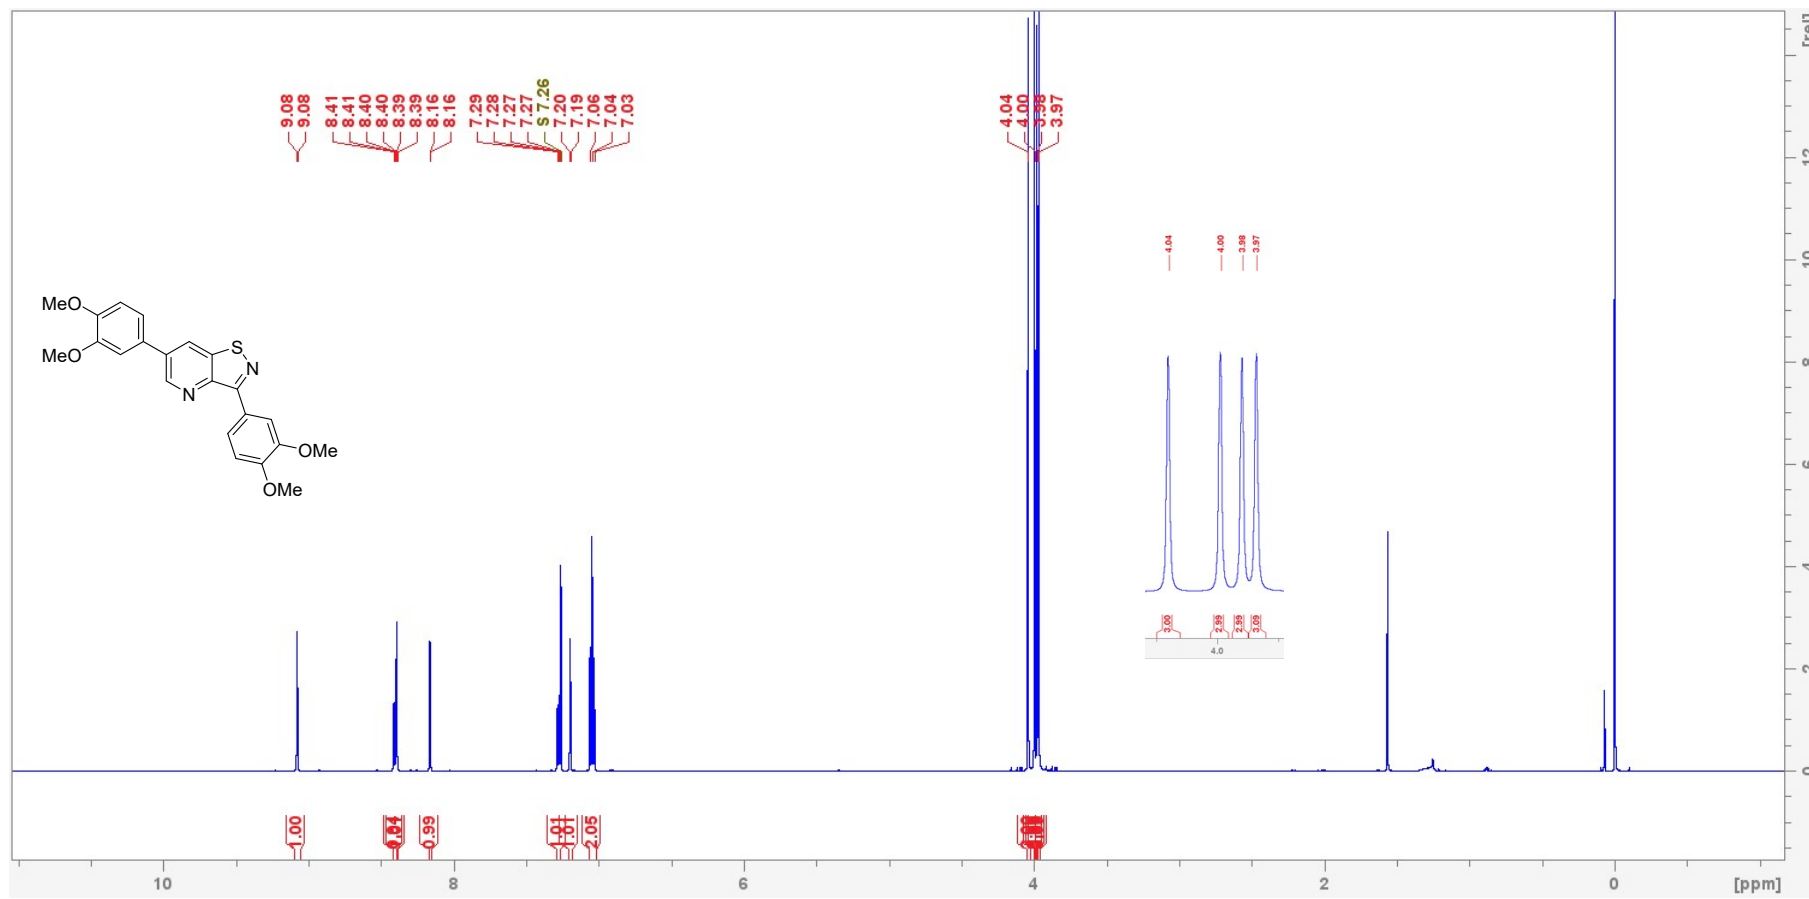

<sup>1</sup>H NMR spectrum (600 MHz, CDCl<sub>3</sub>) of **18j**

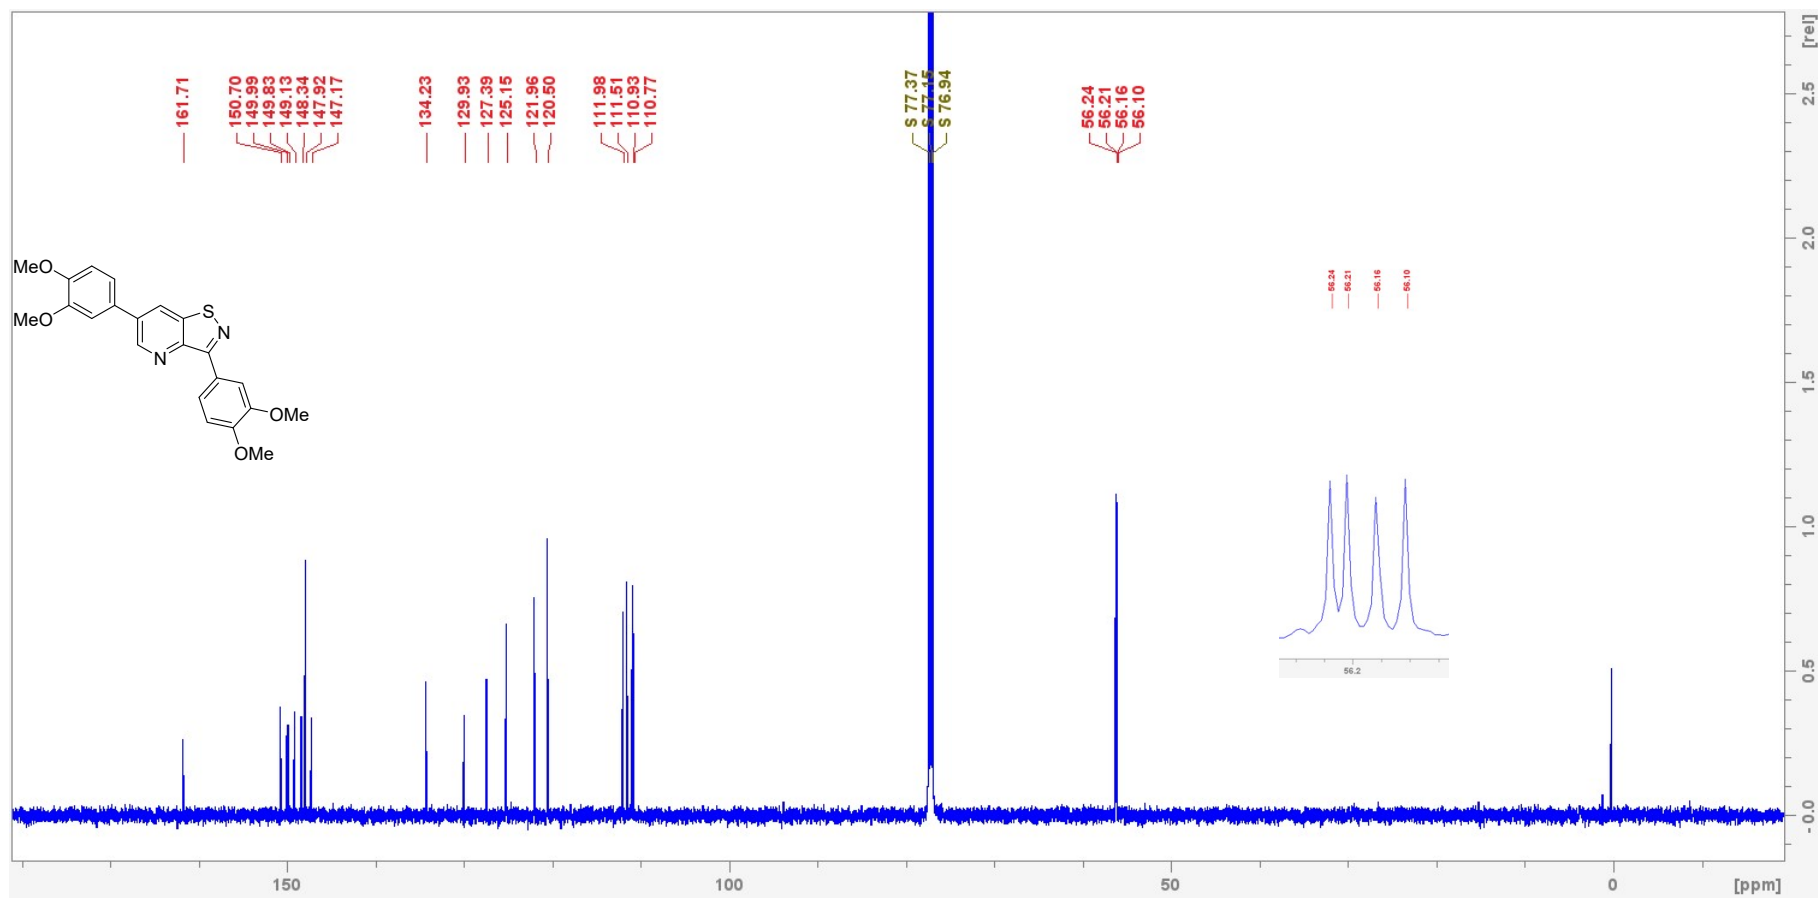

<sup>13</sup>C NMR spectrum (151 MHz, CDCl<sub>3</sub>) of **18j**

4-(6-(4-Fluorophenyl)isothiazolo[4,5-b]pyridin-3-yl)morpholine (18k)

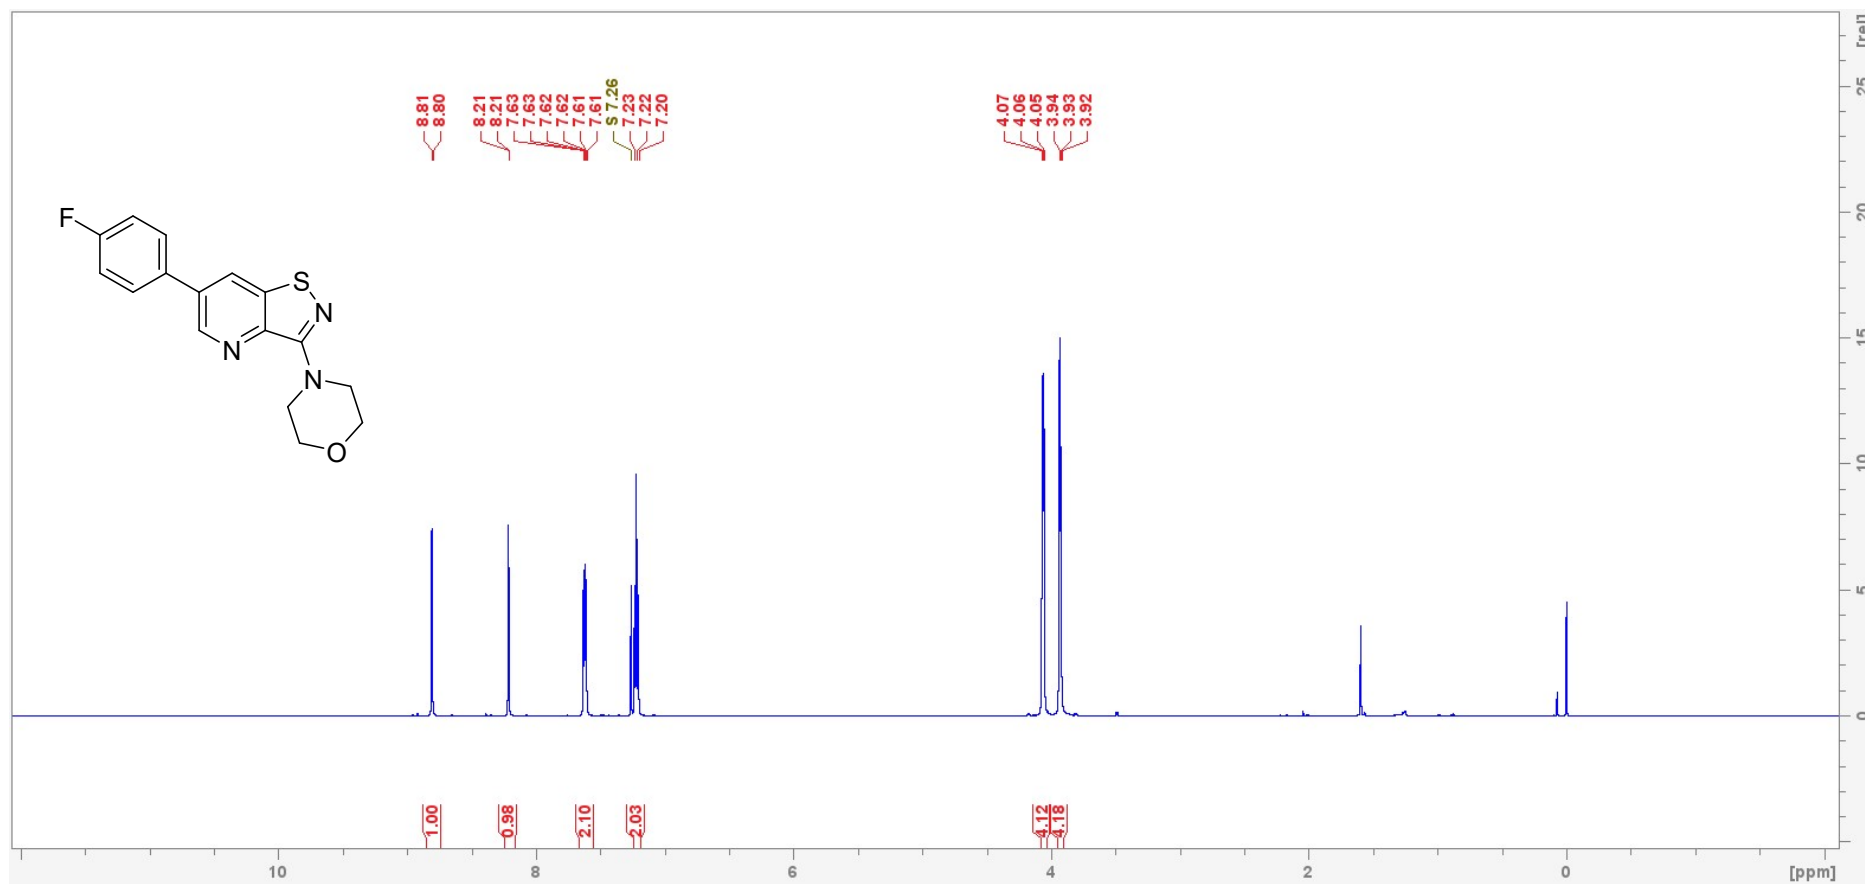

<sup>1</sup>H NMR spectrum (600 MHz, CDCl<sub>3</sub>) of 18k

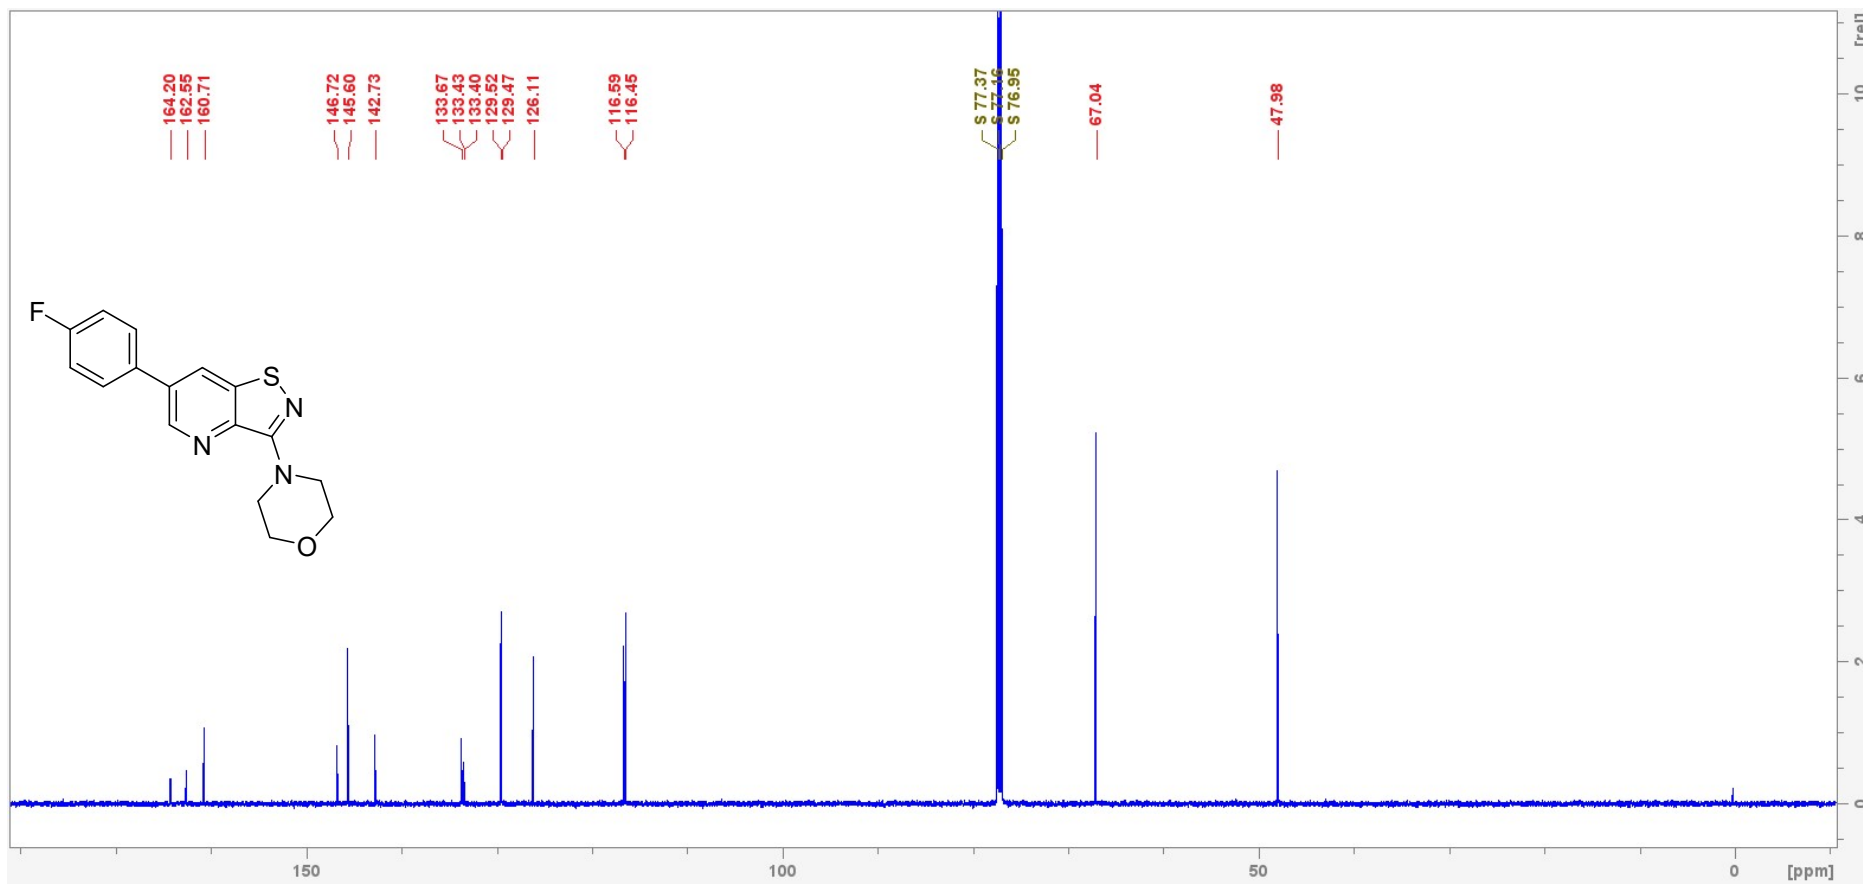

$^{13}\text{C}$  NMR spectrum (151 MHz,  $\text{CDCl}_3$ ) of **18k**



4-(6-(Pyridin-3-ylethynyl)isothiazolo[4,5-b]pyridin-3-yl)morpholine (18I)

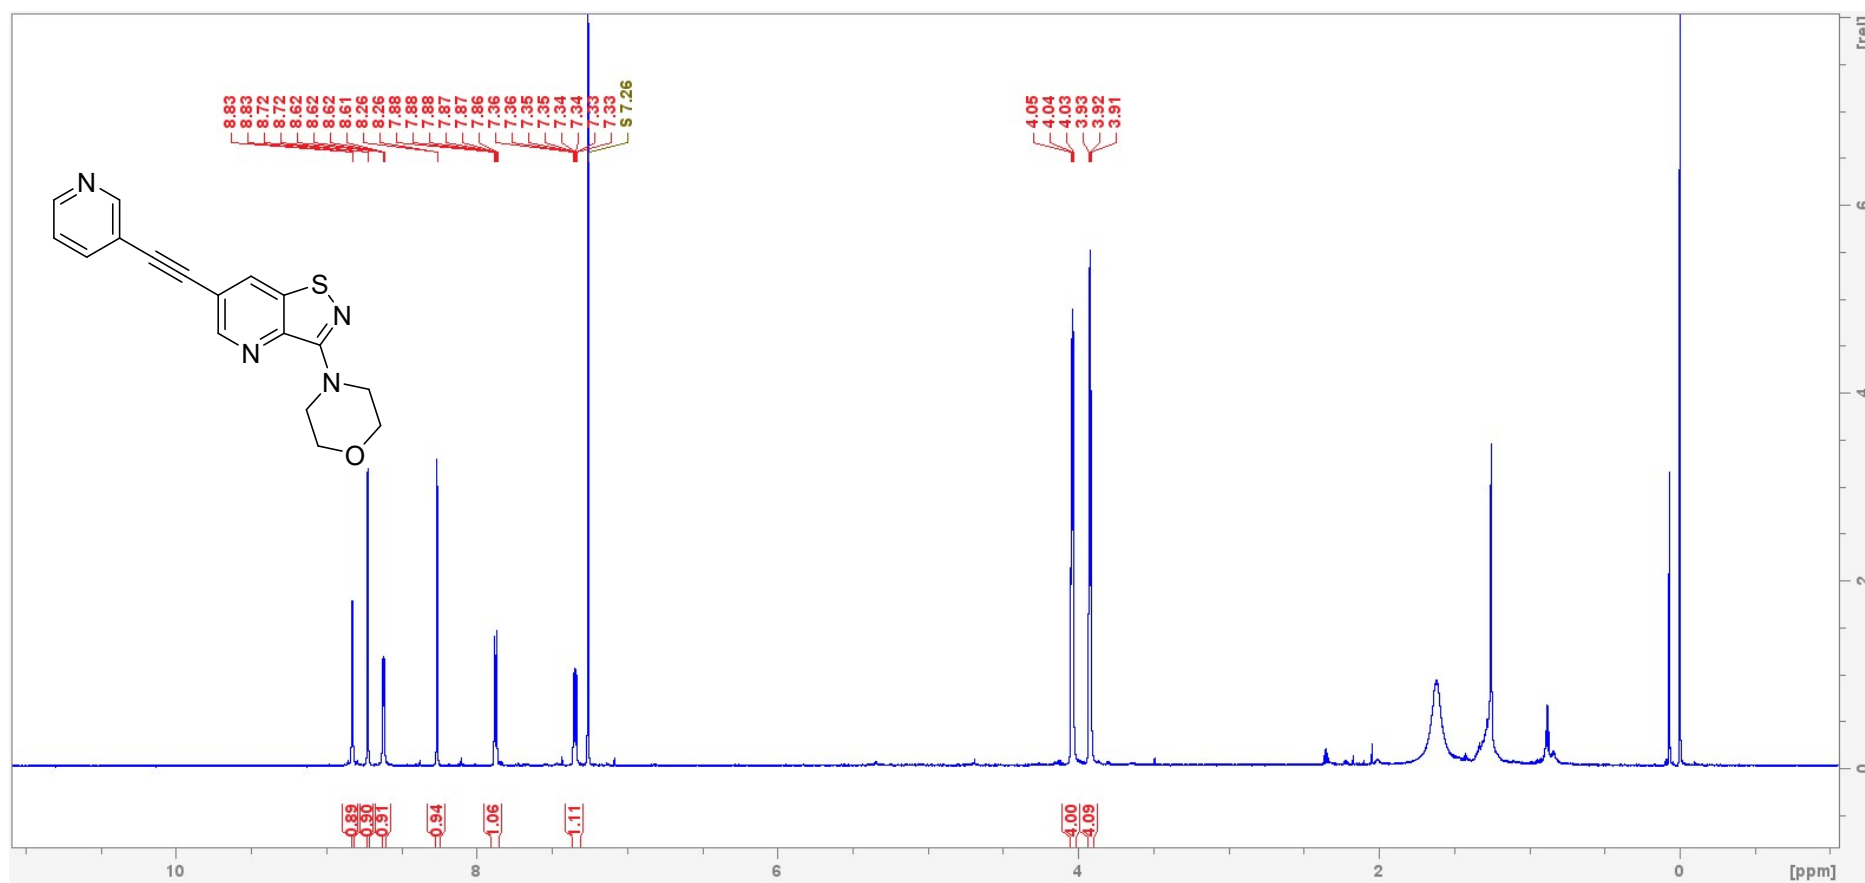

<sup>1</sup>H NMR spectrum (600 MHz, CDCl<sub>3</sub>) of **18I**

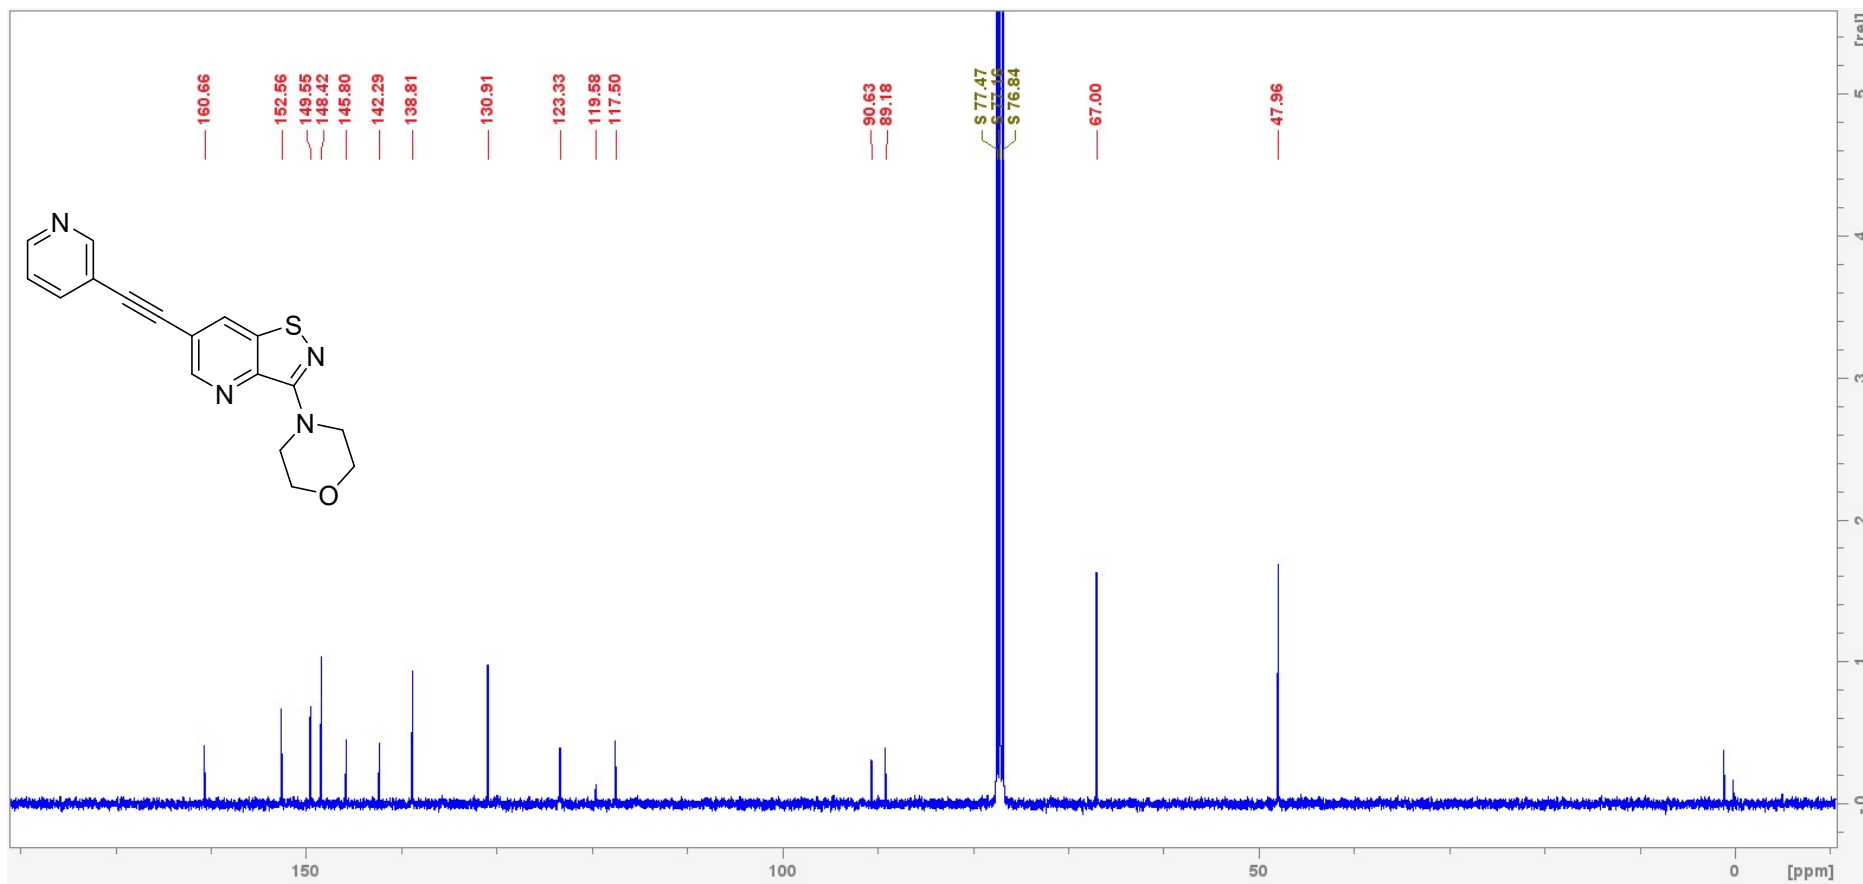

<sup>13</sup>C NMR spectrum (101 MHz, CDCl<sub>3</sub>) of **181**

**6-Chloro-3-((4-methoxybenzyl)thio)picolinonitrile (20)**

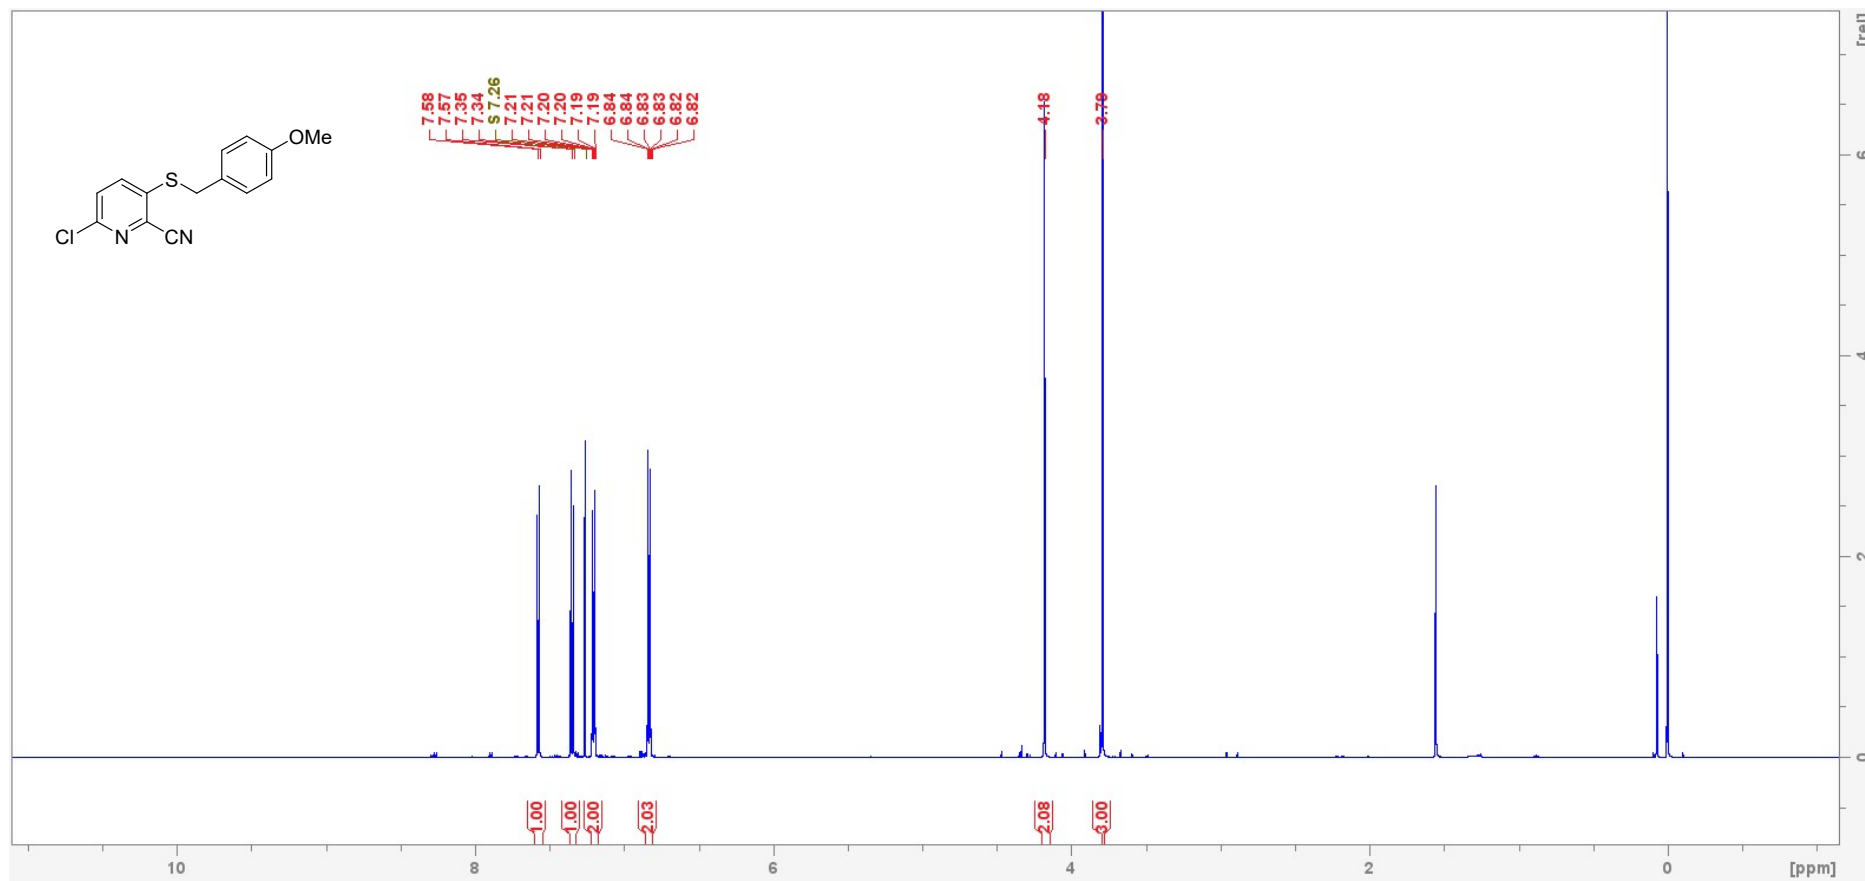

<sup>1</sup>H NMR spectrum (600 MHz, CDCl<sub>3</sub>) of **20**

Zoom-in on the aromatic area:

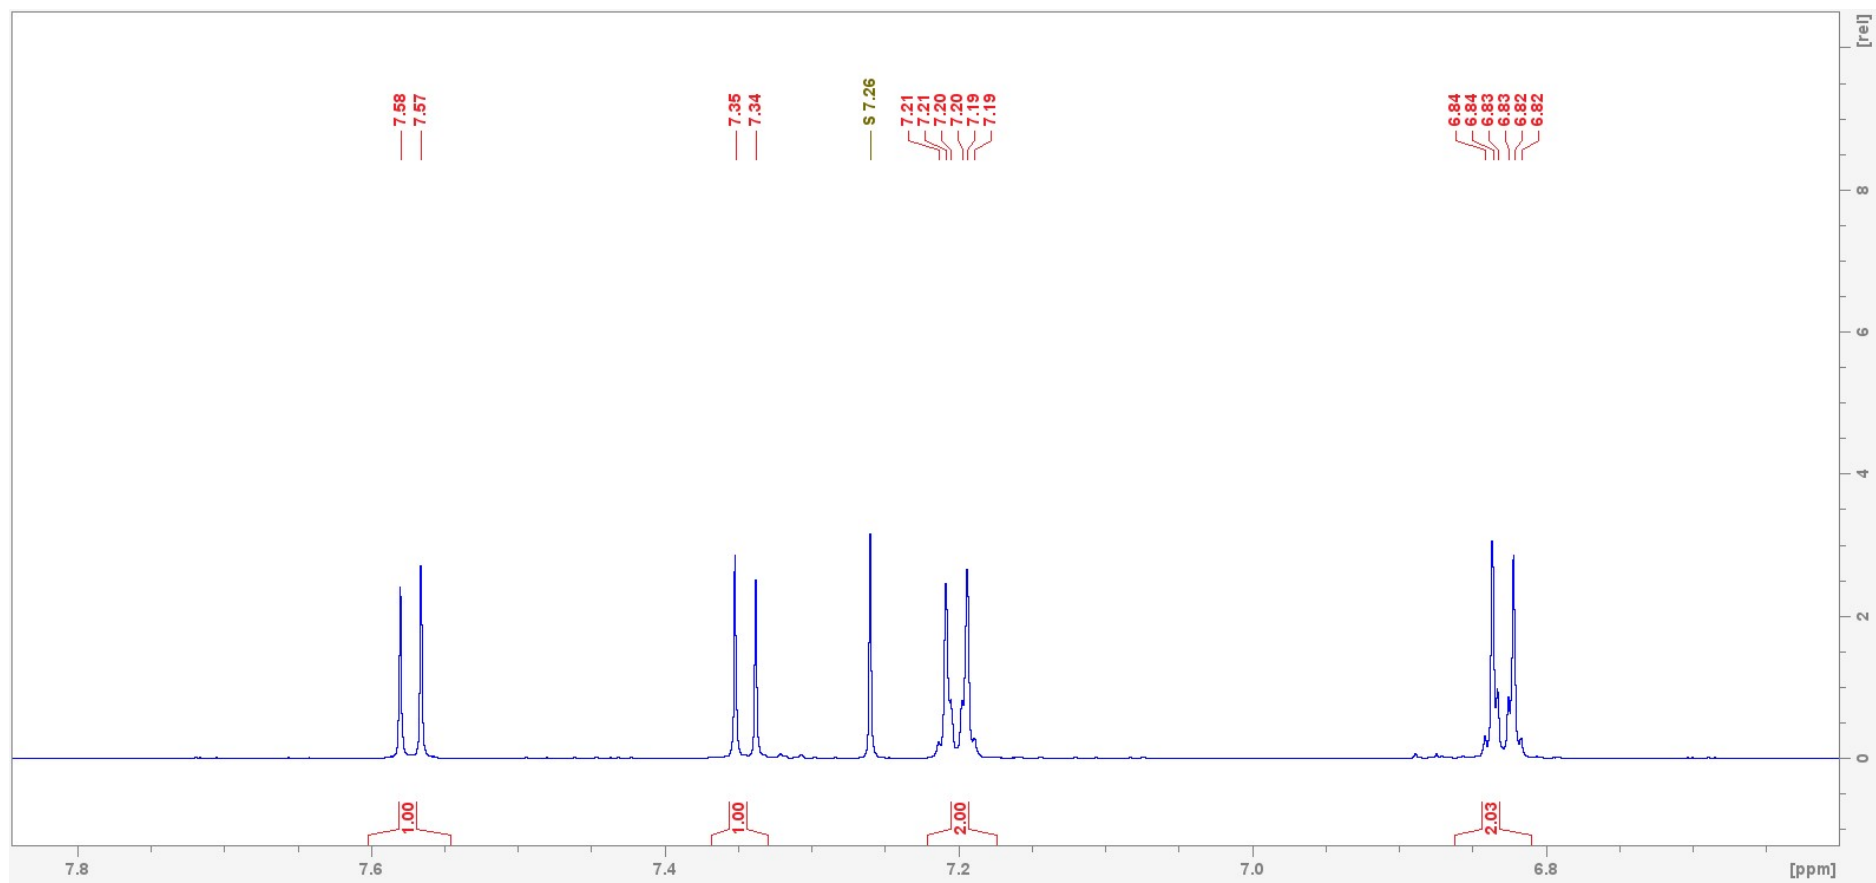

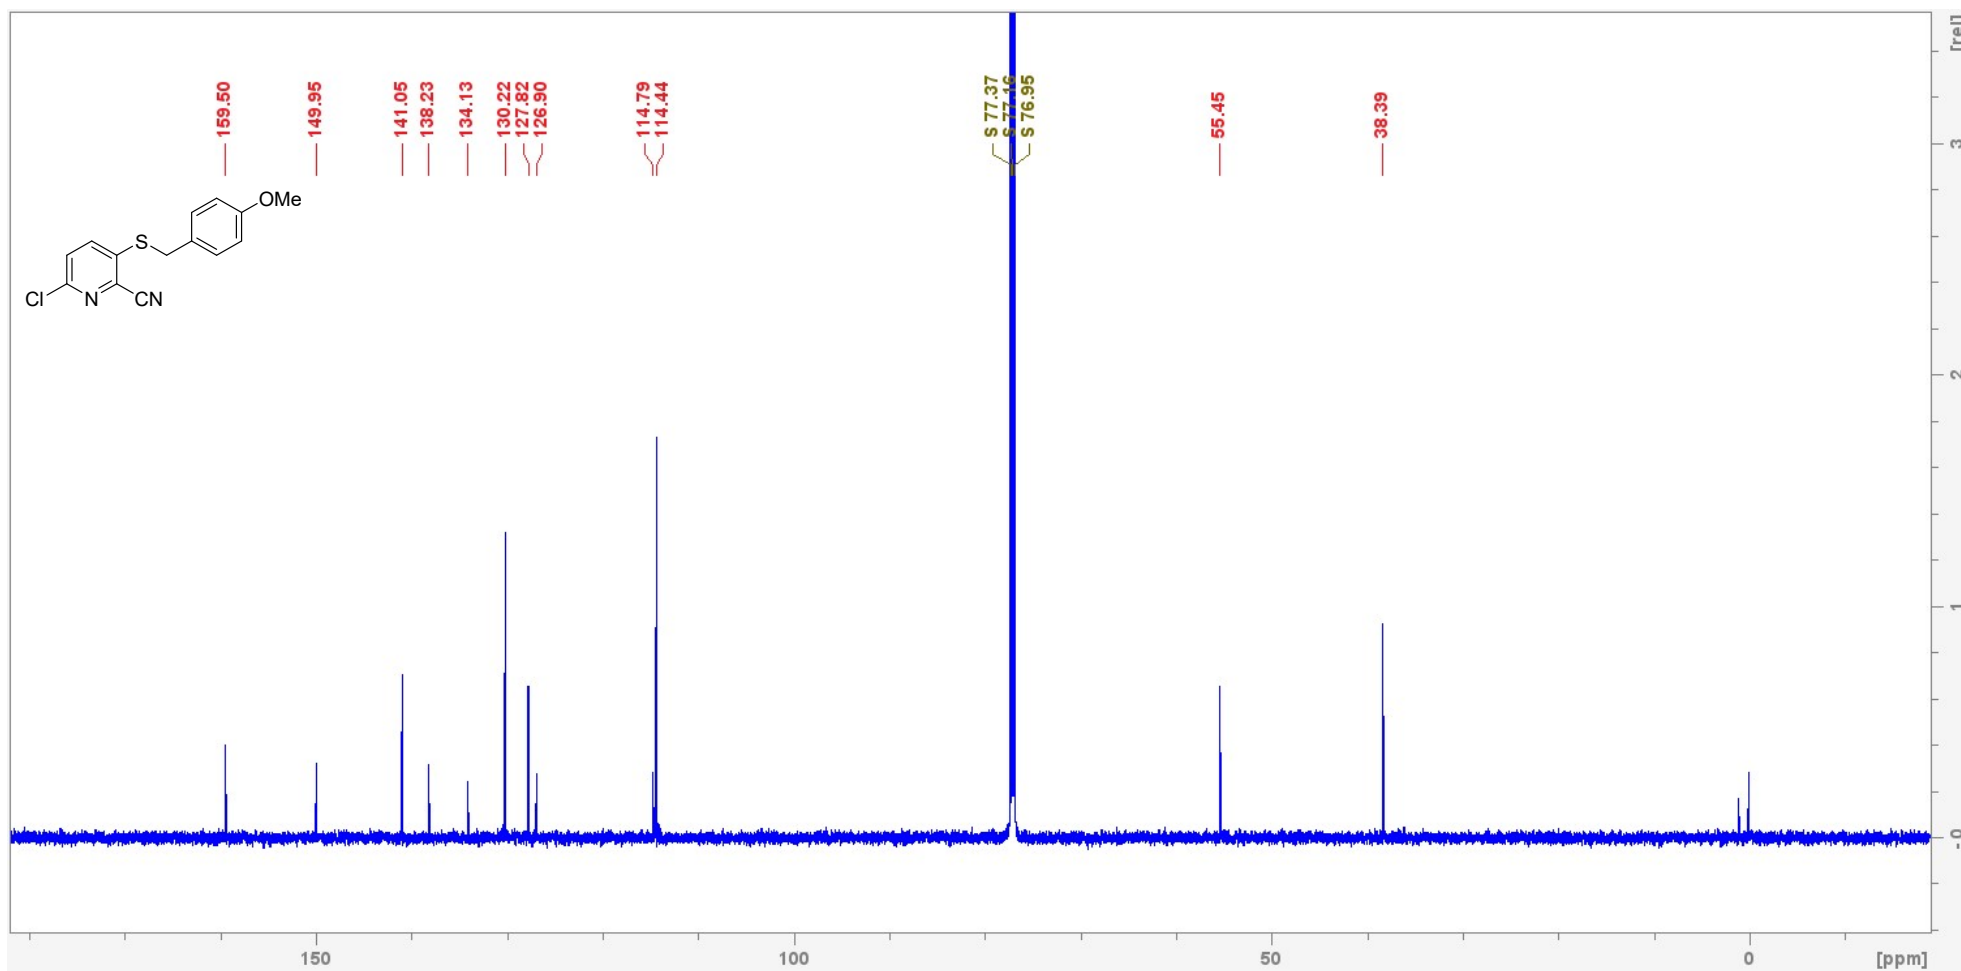

<sup>13</sup>C NMR spectrum (151 MHz, CDCl<sub>3</sub>) of **20**

**3-Bromo-5-chloroisothiazolo[4,5-*b*]pyridine (21)**

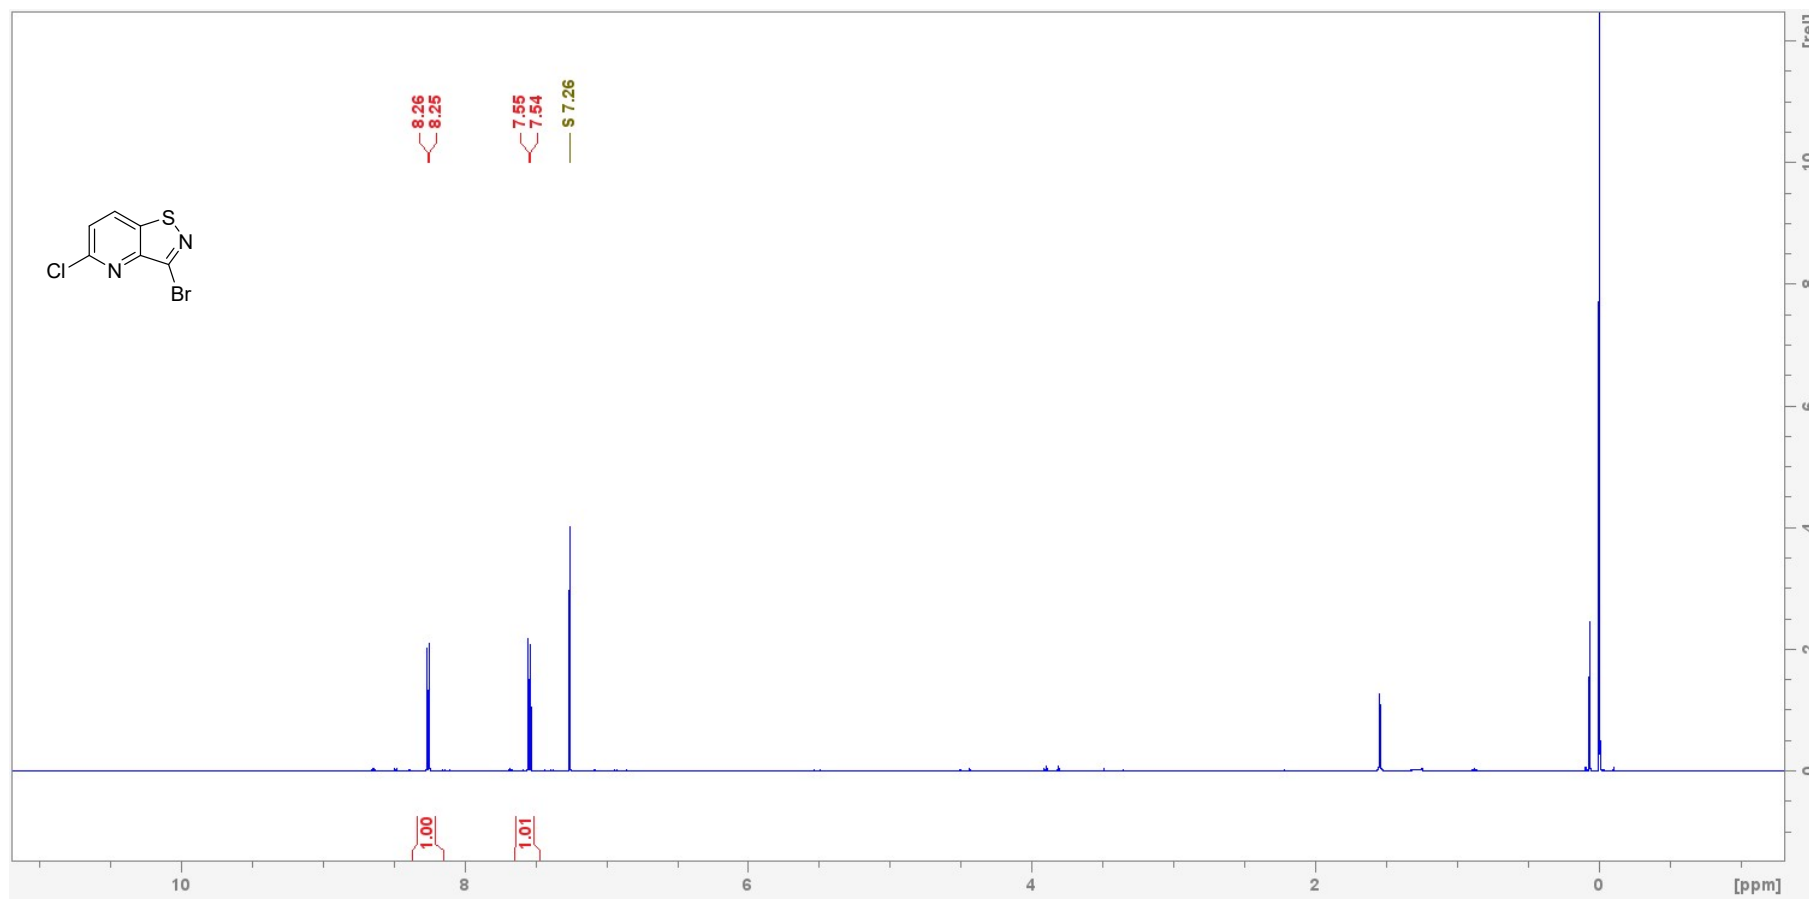

<sup>1</sup>H NMR spectrum (600 MHz, CDCl<sub>3</sub>) of **21**

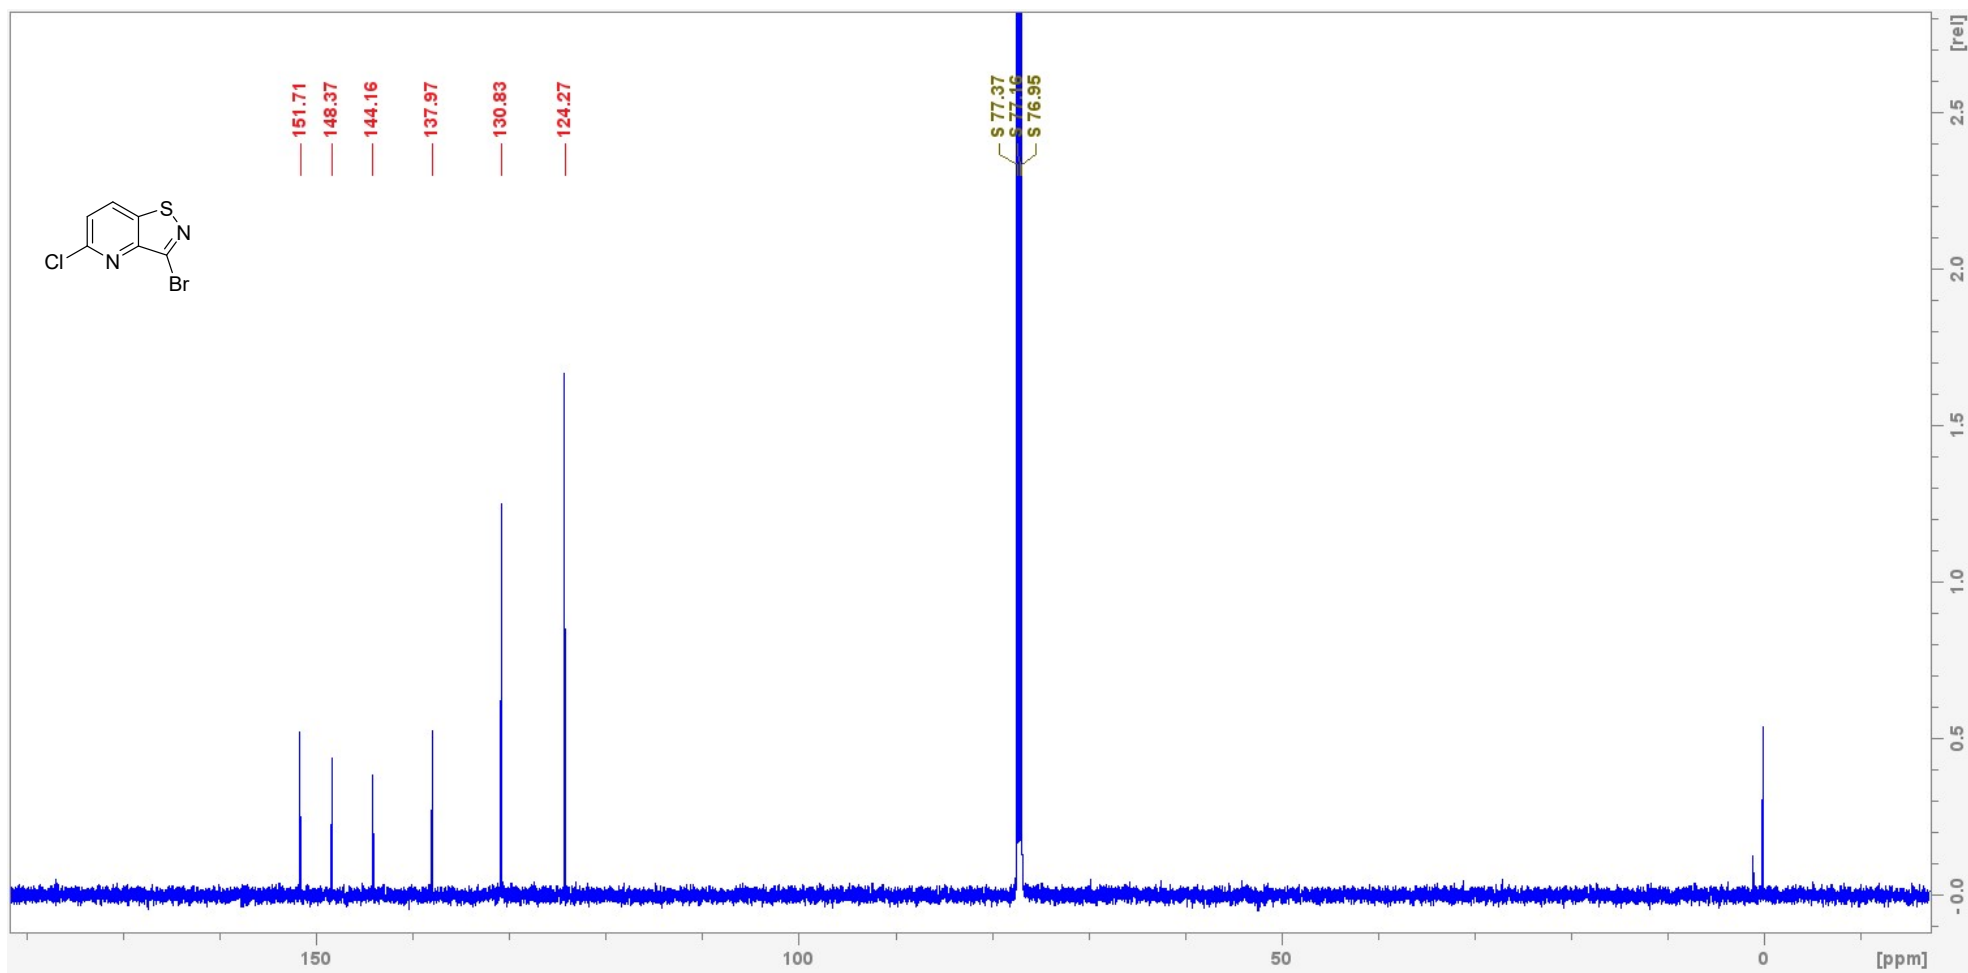

<sup>13</sup>C NMR spectrum (151 MHz, CDCl<sub>3</sub>) of **21**

4-(5-Chloroisothiazolo[4,5-*b*]pyridin-3-yl)morpholine (**22a**)

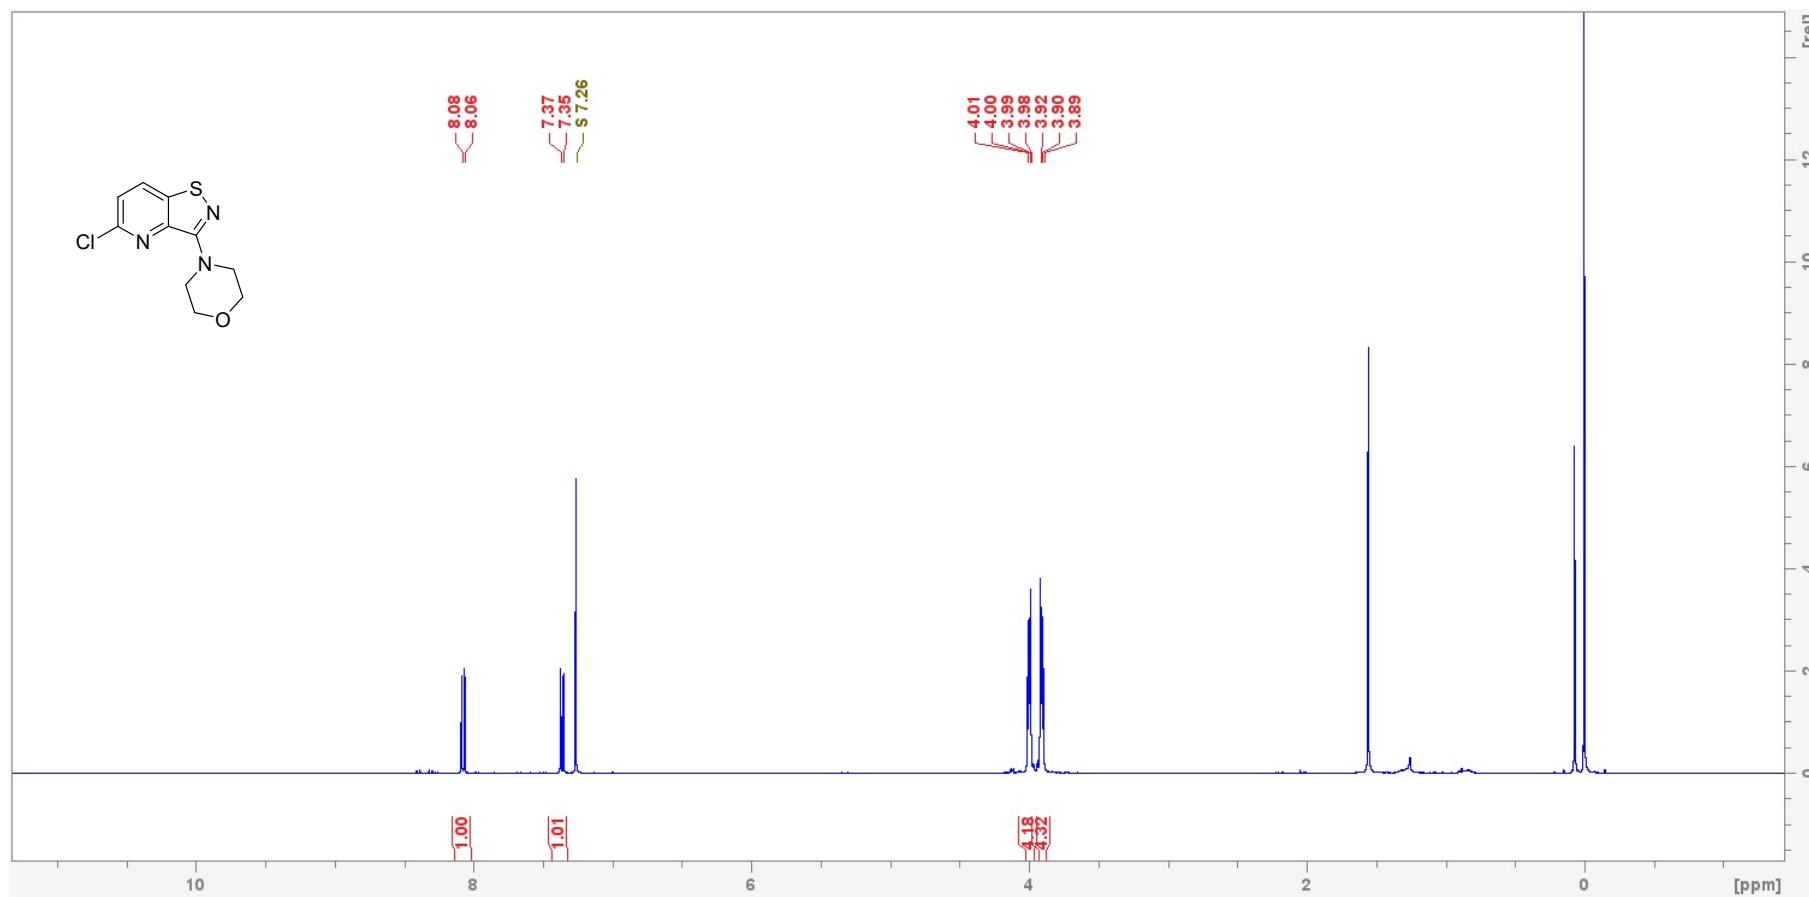

<sup>1</sup>H NMR spectrum (400 MHz, CDCl<sub>3</sub>) of **22a**



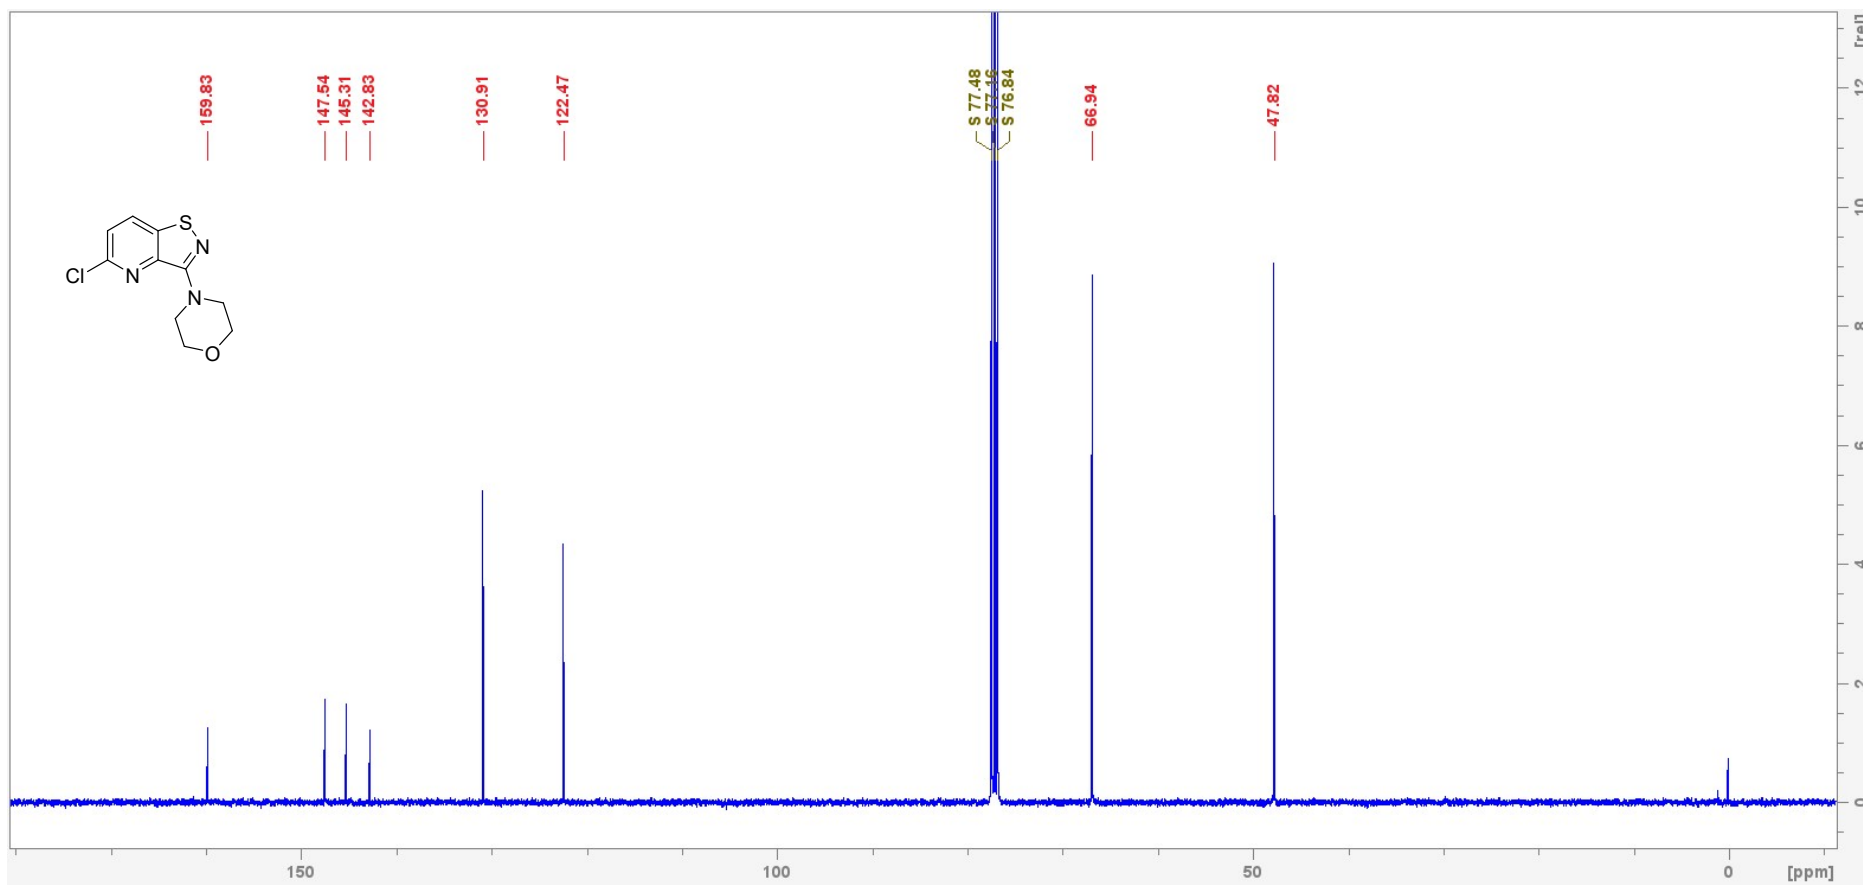

<sup>13</sup>C NMR spectrum (151 MHz, CDCl<sub>3</sub>) of **22a**

**(2S,6R)-4-(5-Chloroisothiazolo[4,5-b]pyridin-3-yl)-2,6-dimethylmorpholine (22b)**

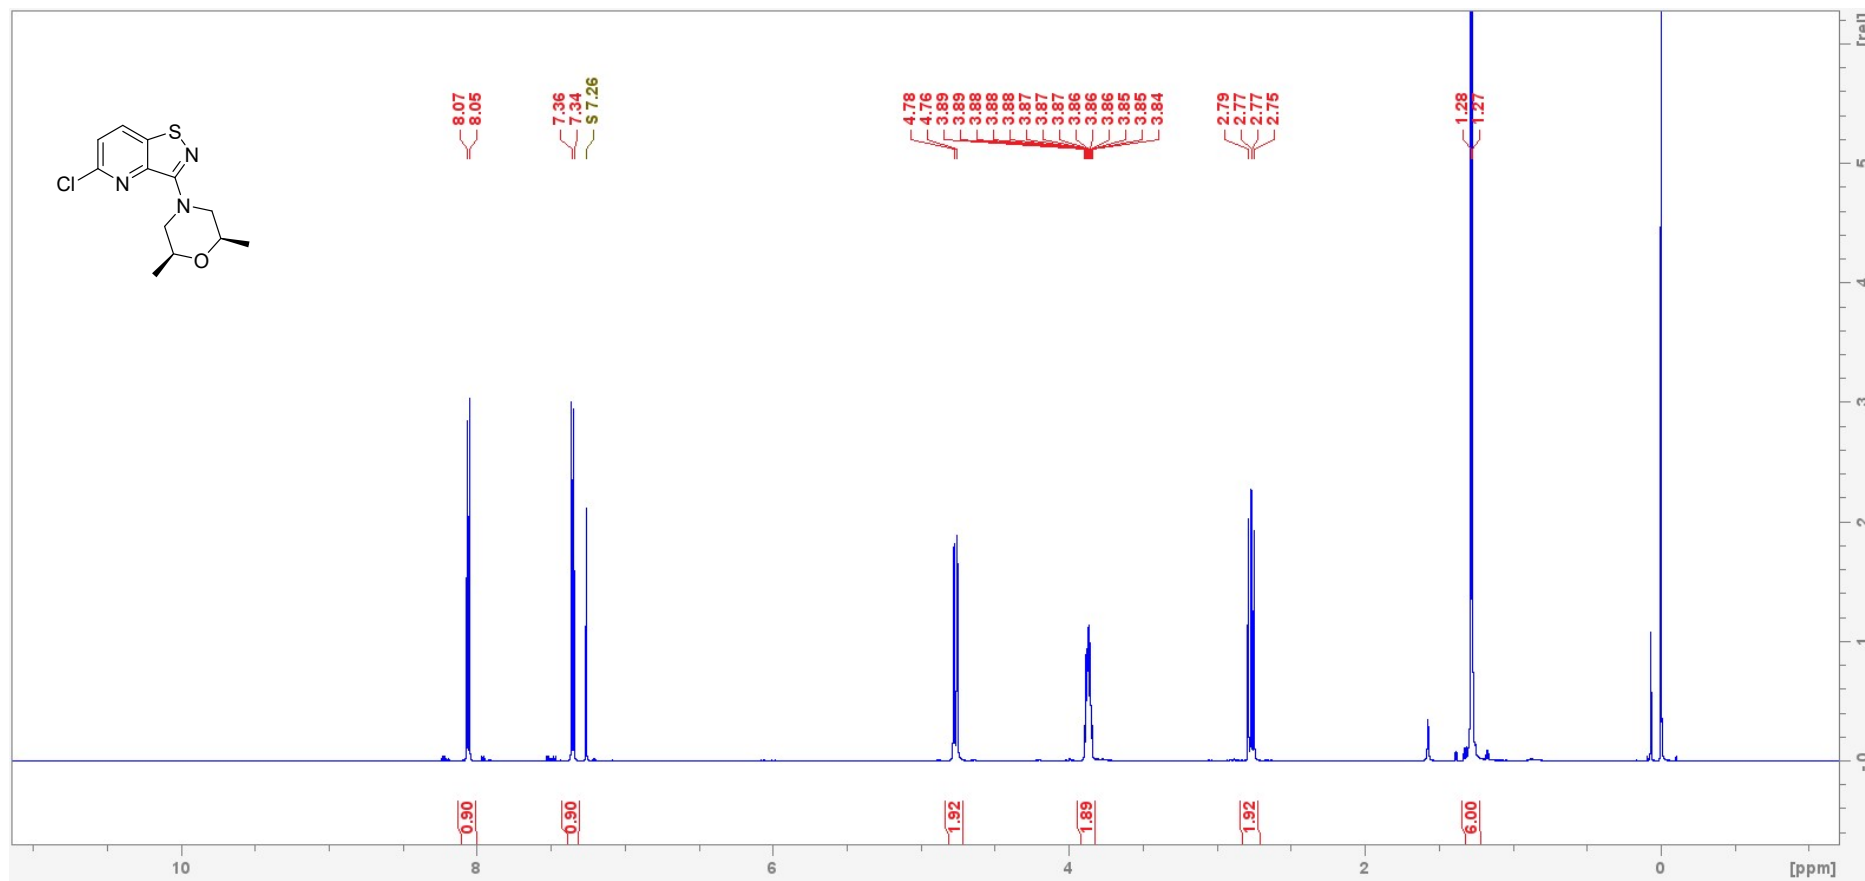

<sup>1</sup>H NMR spectrum (600 MHz, CDCl<sub>3</sub>) of **22b**

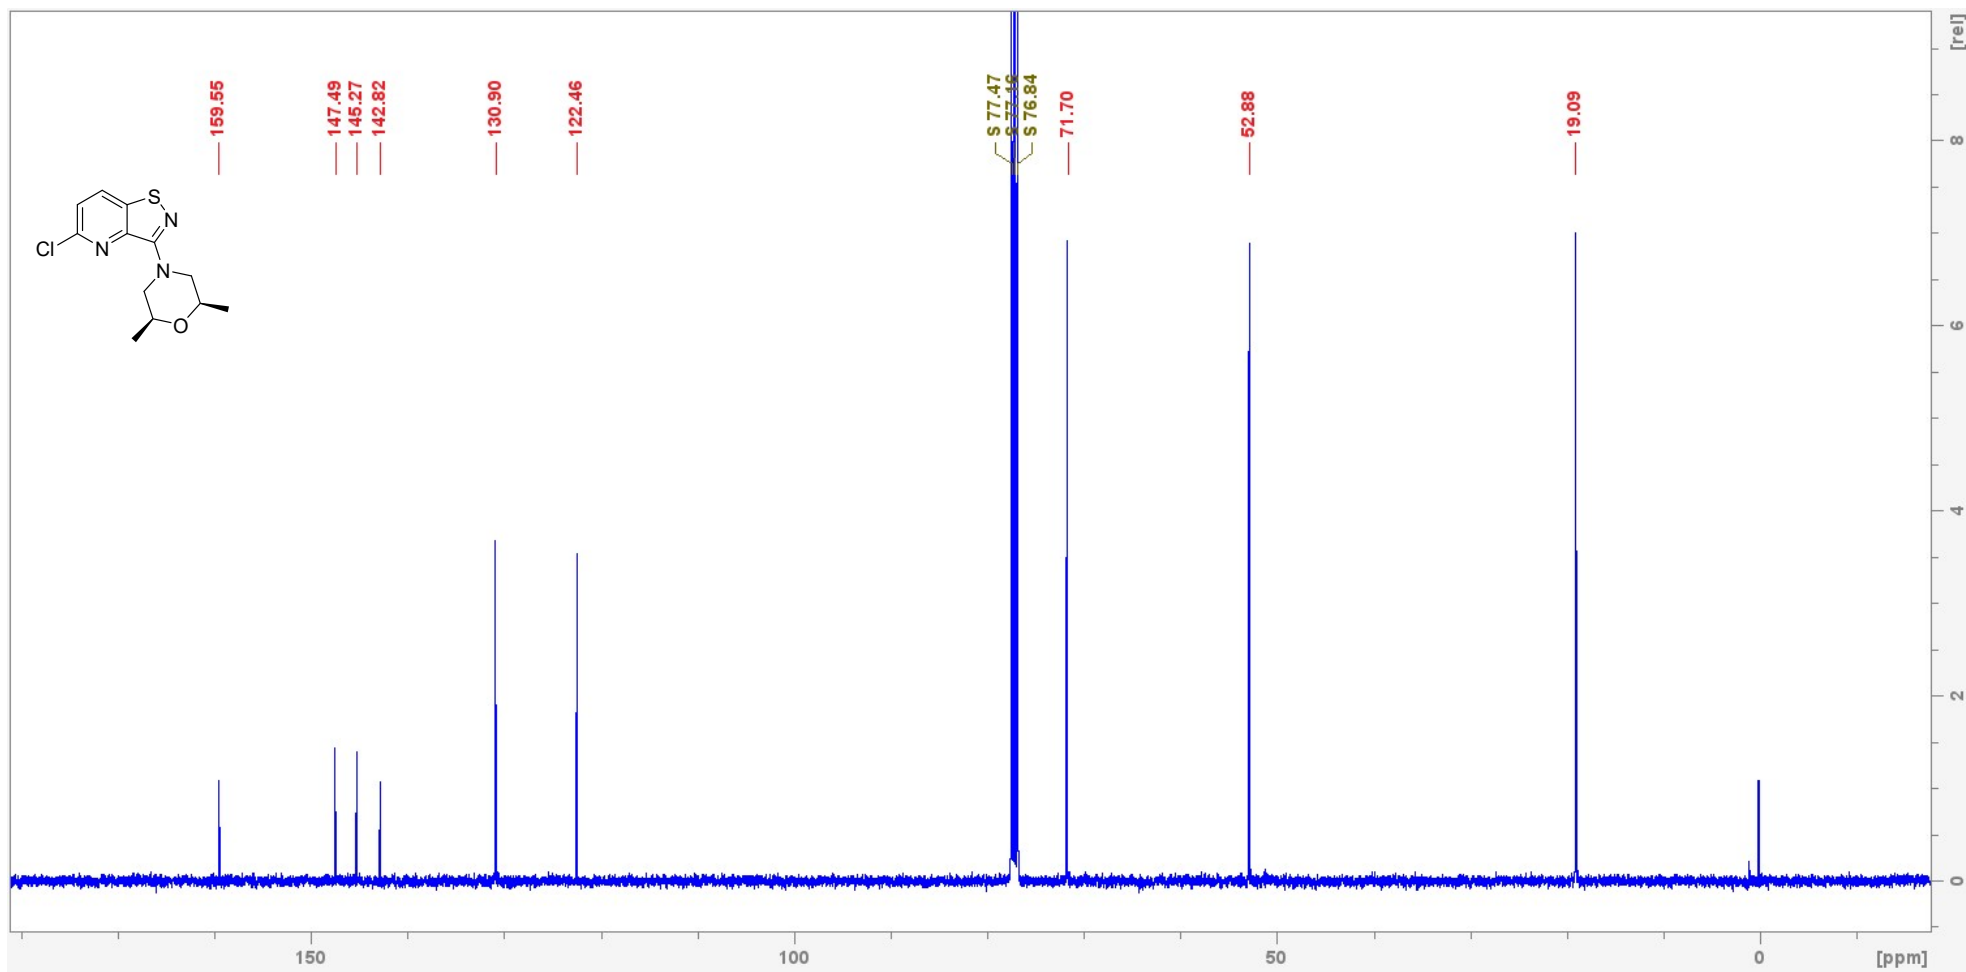

<sup>13</sup>C NMR spectrum (101 MHz, CDCl<sub>3</sub>) of **22b**

4-(5-(3,4-Dimethoxyphenyl)isothiazolo[4,5-b]pyridin-3-yl)morpholine (23a)

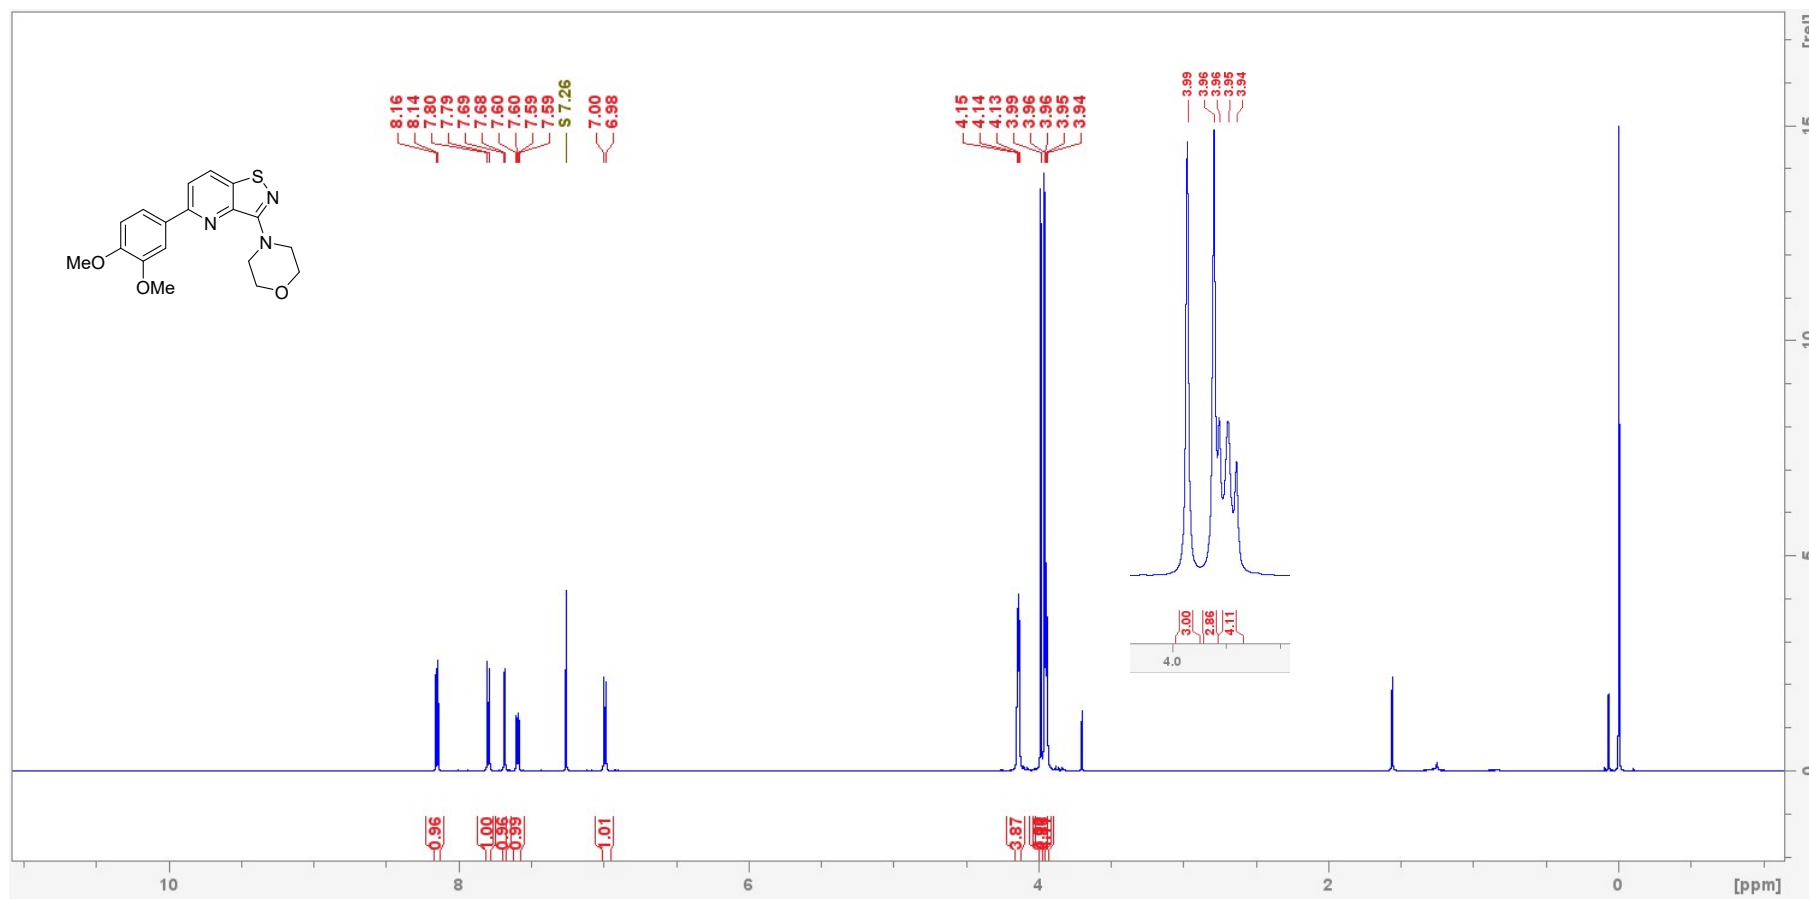

<sup>1</sup>H NMR spectrum (600 MHz, CDCl<sub>3</sub>) of **23a**

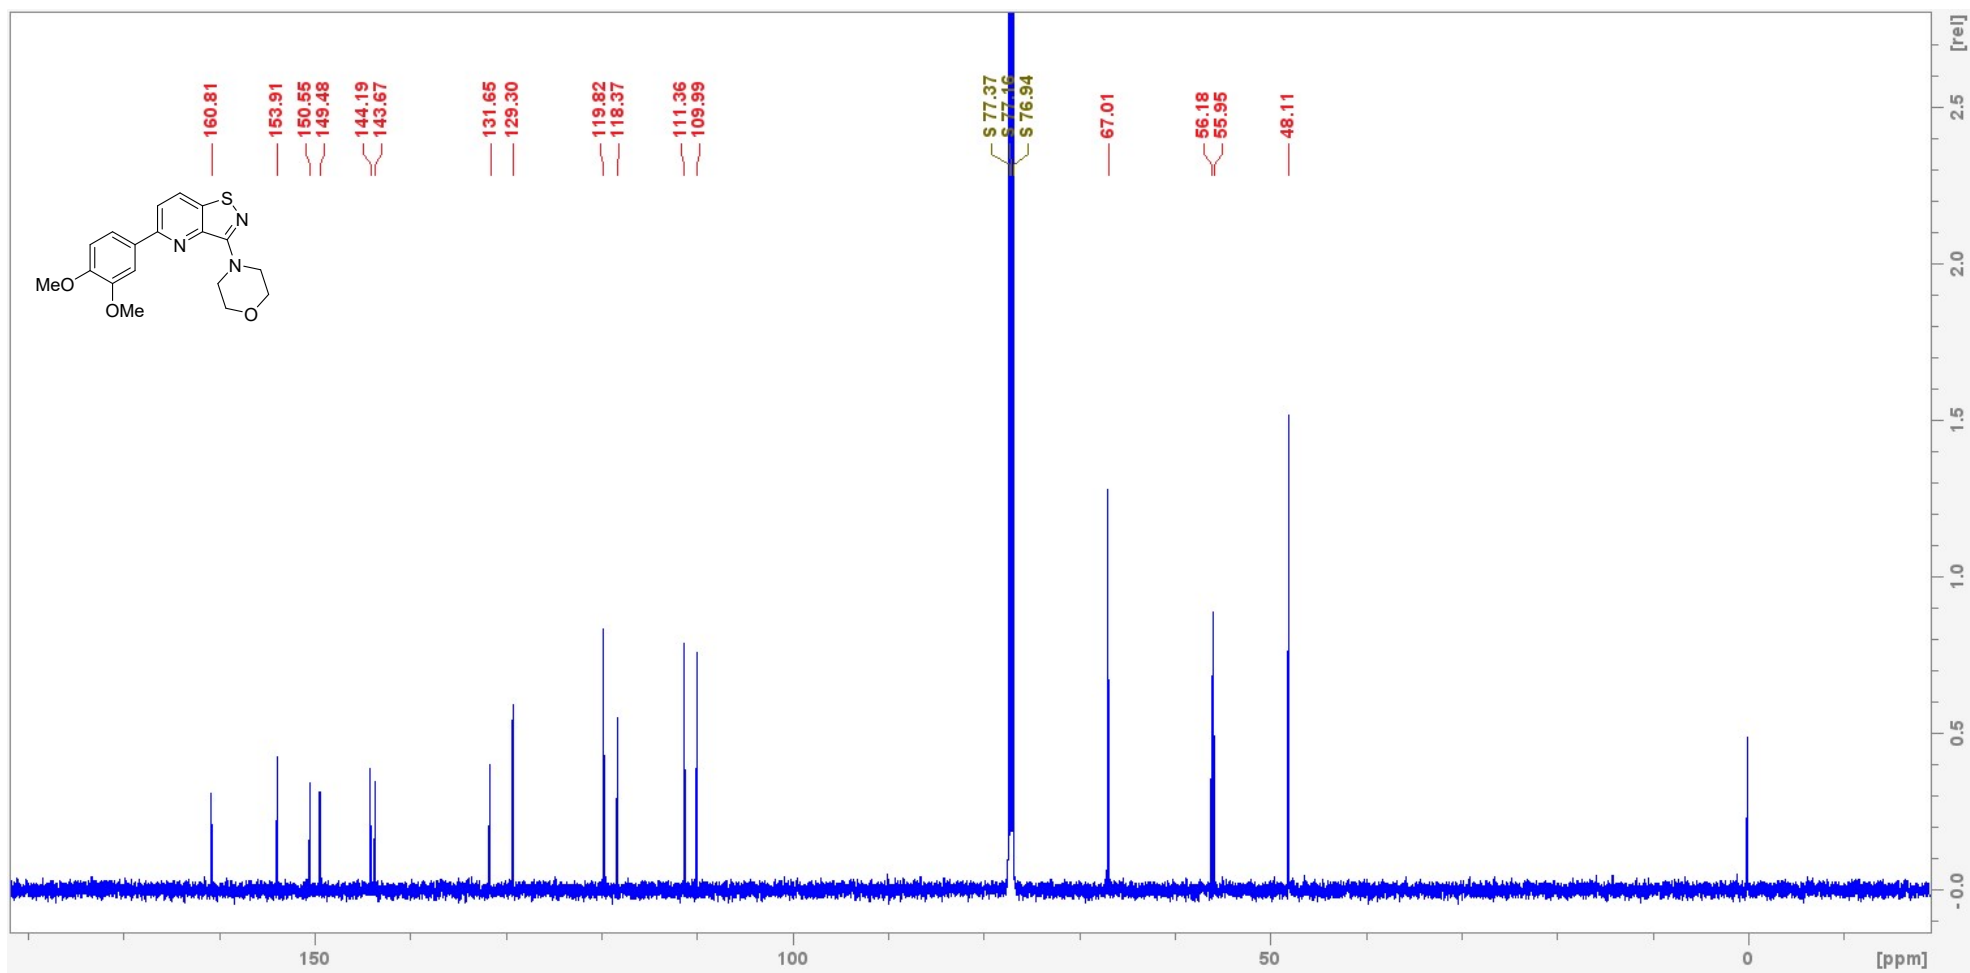

<sup>13</sup>C NMR spectrum (151 MHz, CDCl<sub>3</sub>) of 23a

**(2S,6R)-4-(5-(3,4-Dimethoxyphenyl)isothiazolo[4,5-b]pyridin-3-yl)-2,6-dimethylmorpholine (23b)**

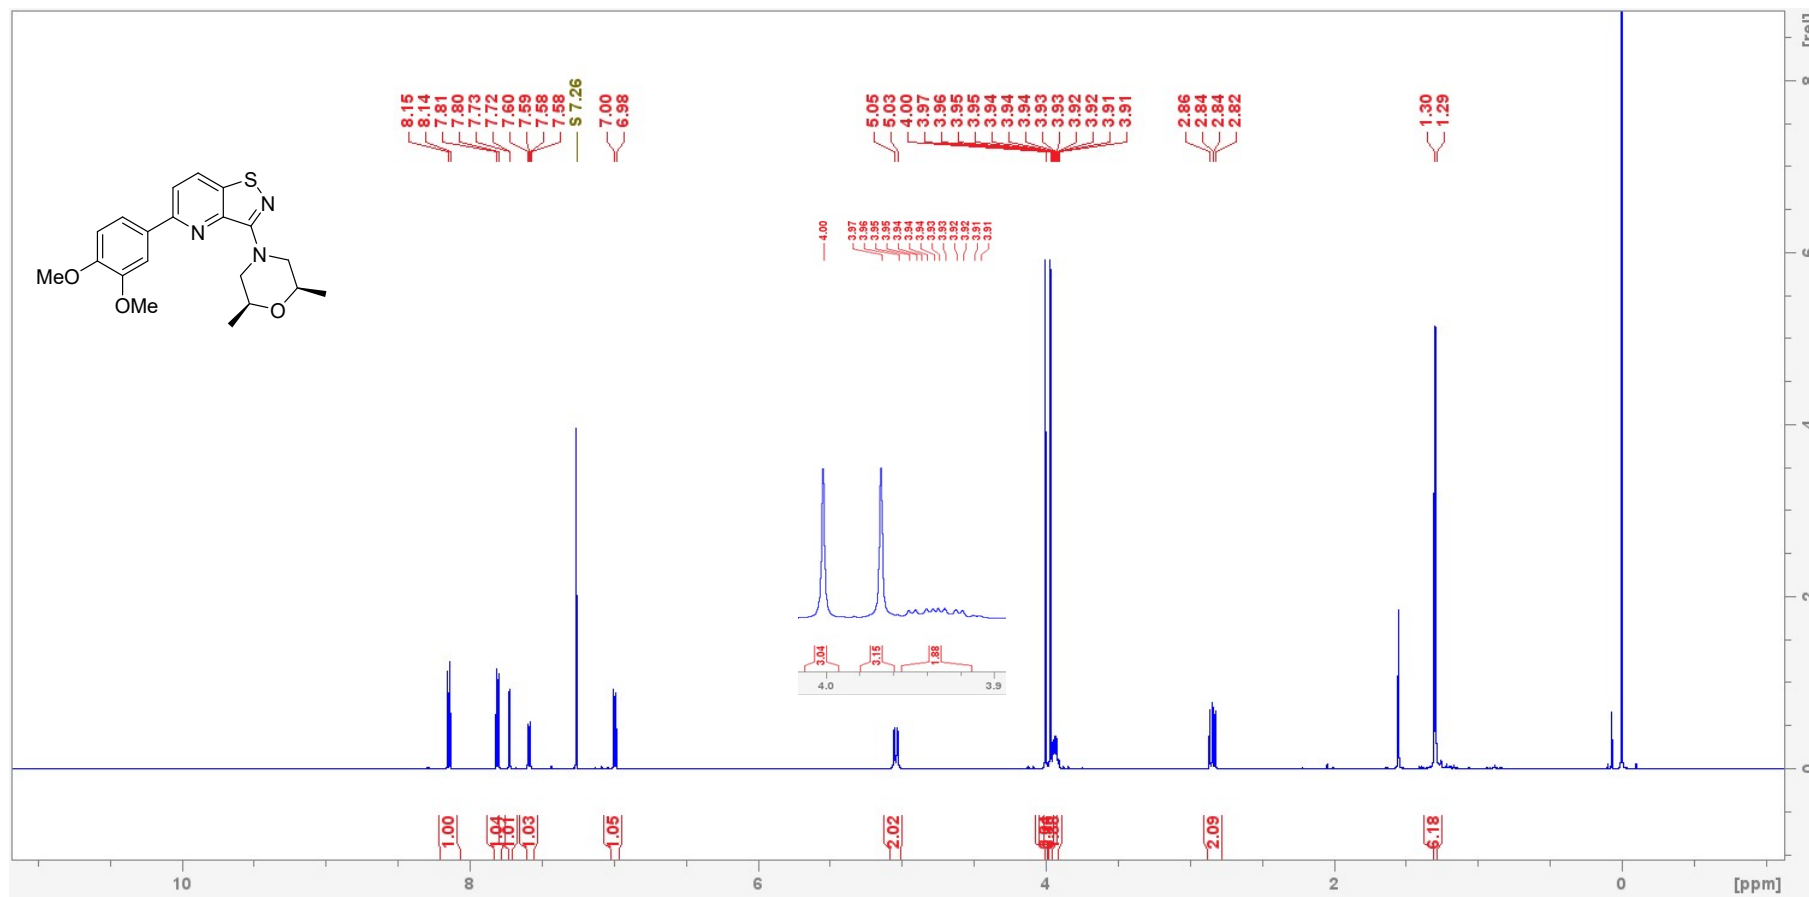

<sup>1</sup>H NMR spectrum (600 MHz, CDCl<sub>3</sub>) of **23b**

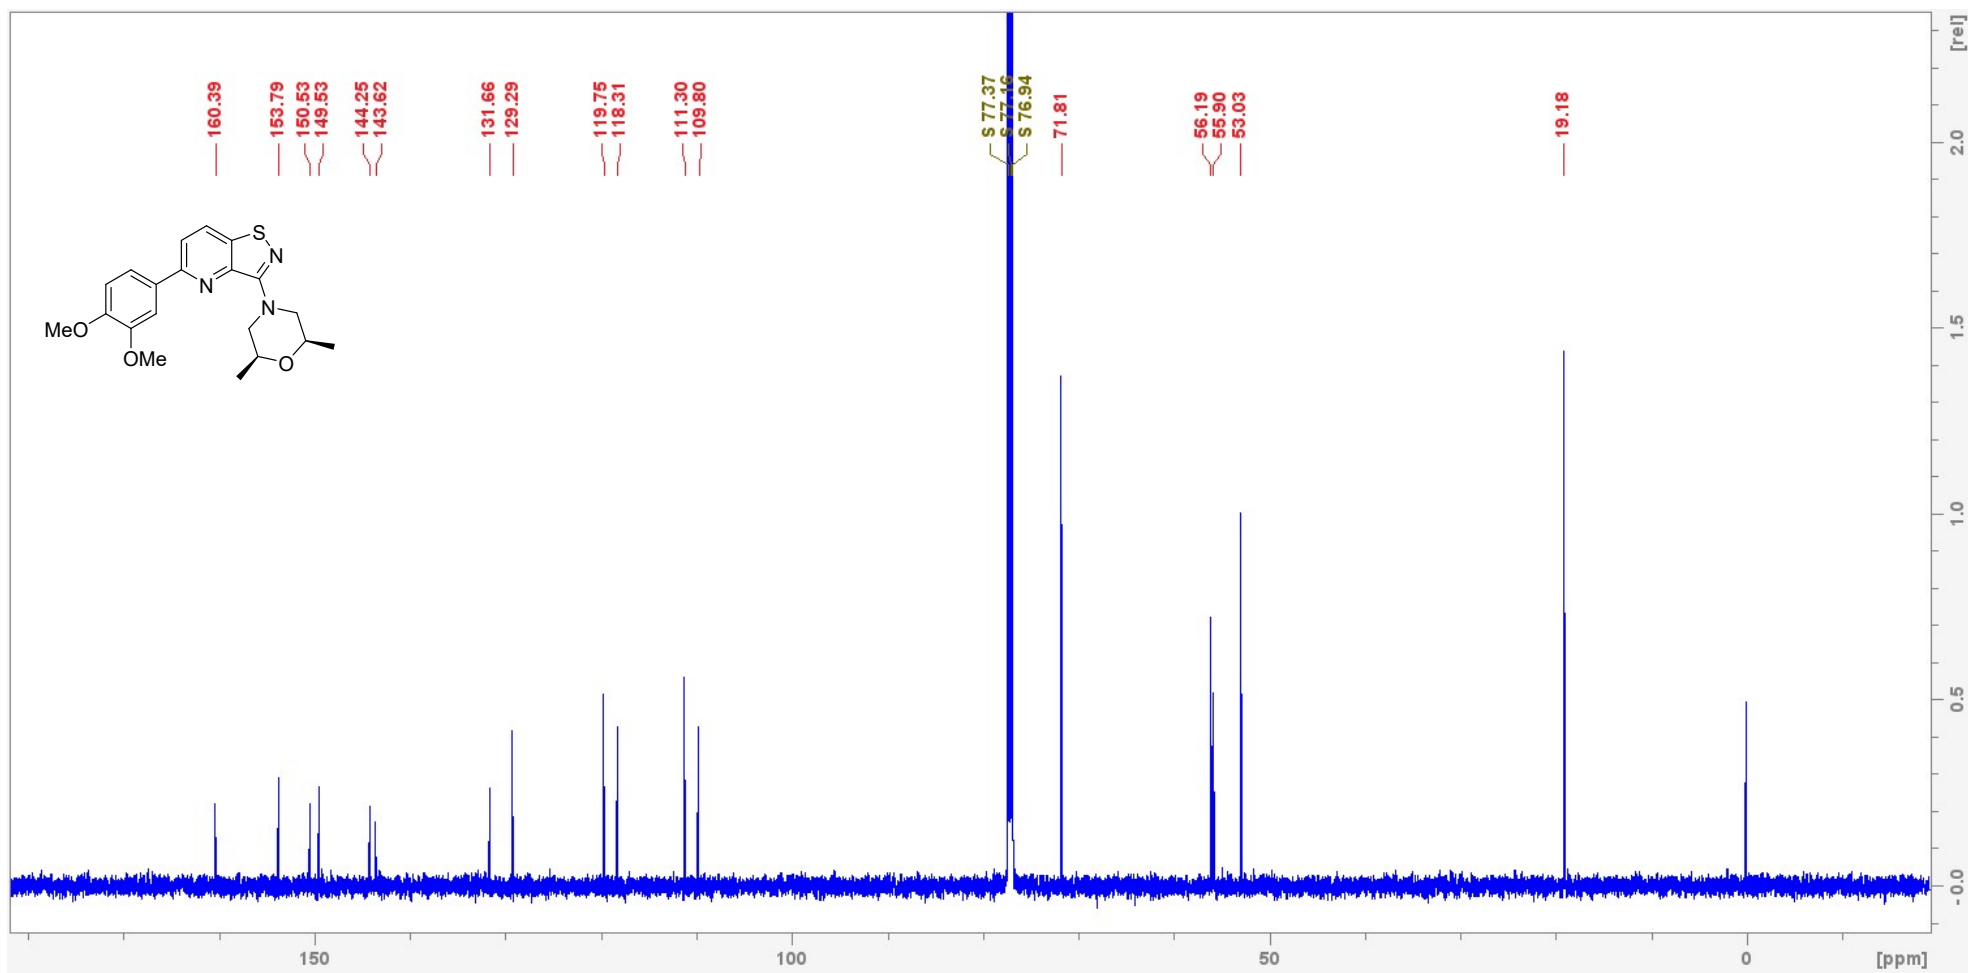

<sup>13</sup>C NMR spectrum (151 MHz, CDCl<sub>3</sub>) of **23b**
